# Supplementary material for: Improving life expectancy: how many years behind has the USA fallen? A cross-national comparison among high-income countries from 1958 to 2007
Source: PubMed Central journal article supplement — BMJ Open. 2013 Jul 5;3(7):e002814. doi: 10.1136/bmjopen-2013-002814 (PMC3703571; doi:10.1136/bmjopen-2013-002814), 2013-07-05
Supplement: bmjopen-2013-002814.draft_revisions.pdf [file bmjopen-2013-002814.draft_revisions.pdf]

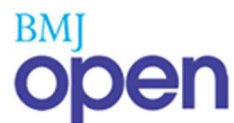

**Improving life expectancy: how many years behind has the US fallen?**

|                                 |                                                                                                                                                         |
|---------------------------------|---------------------------------------------------------------------------------------------------------------------------------------------------------|
| Journal:                        | <i>BMJ Open</i>                                                                                                                                         |
| Manuscript ID:                  | bmjopen-2013-002814                                                                                                                                     |
| Article Type:                   | Research                                                                                                                                                |
| Date Submitted by the Author:   | 01-Mar-2013                                                                                                                                             |
| Complete List of Authors:       | Verguet, Stephane; University of Washington, Global Health<br>Jamison, Dean; University of Washington, Global Health                                    |
| <b>Primary Subject Heading</b>: | Public health                                                                                                                                           |
| Secondary Subject Heading:      | Public health, Health services research                                                                                                                 |
| Keywords:                       | PUBLIC HEALTH, International health services < HEALTH SERVICES ADMINISTRATION & MANAGEMENT, Health policy < HEALTH SERVICES ADMINISTRATION & MANAGEMENT |
|                                 |                                                                                                                                                         |

SCHOLARONE™  
Manuscripts

**Title**

Improving life expectancy: how many years behind has the US fallen?

**Authors**

Stéphane Verguet, Dean T Jamison

**Affiliation**

Department of Global Health, University of Washington, Seattle, WA, USA

**Correspondence to**

Stéphane Verguet, Department of Global Health, University of Washington, 325, 9<sup>th</sup> Avenue, Box 359931, Seattle, WA, 98104. Ph: +1-206-685-6845. Fax: +1-206-744-3694. Email: verguet@uw.edu.

**Keywords**

Life expectancy; population health; high-income countries; US; years behind.

## Abstract

*Objective:* many studies have documented higher mortality levels in the United States compared to other high-income nations. We add to this discussion by quantifying how many years behind comparison countries the US has fallen and by identifying when US mortality rates began to diverge.

*Design:* We use full life tables, for males and females, for seventeen high-income countries including the US. We extract the life expectancy at birth and compute the mortality rates for each five-year age group from birth up to age 80. Using the metric of how many “years behind” a country has fallen, we compare US mortality levels with those in the other high-income countries (“comparators”).

*Results:* We report life expectancy for seventeen high-income countries, for the period 1958-2007. Up to 1980, US men closely tracked comparators in life expectancy. In the late 1970s the US began to diverge from comparators so that the lower US male life expectancy in 2007 corresponded to that of the comparators’ average 15 years earlier. Female life expectancy followed a similar pattern. The largest mortality gap was in the 15-49 age group, for both males and females, where the US had fallen about 40 years behind the comparators by 2007.

*Conclusions:* Some causes proposed for high relative US mortality today – racial differences, lack of universal health insurance – changed little while the mortality gap emerged and grew. Quantification of how many years behind the US has fallen can help provide clues about where to look for potential causes and remedies.

## Article summary

### *Article focus*

- Many studies have documented higher mortality levels in the US compared to other high-income nations of Europe and Australasia.
- This study quantifies how many years behind comparison countries the US has fallen and explores whether there was a particular time when US mortality rates began to diverge from comparators.

### *Key messages*

- Since 1980, US life expectancy has fallen behind that of other high-income nations. The US male life expectancy in 2007 corresponded to that of the comparators' average 15 years earlier. Female life expectancy followed a similar pattern.
- The largest mortality gap was in the 15-49 age group, for both males and females, where by 2007 the US had fallen about 40 years behind the comparators.
- Identification of when US mortality rates began to diverge from comparators provides clues about where to look for potential causes and remedies.

### *Strengths and limitations of this study*

- The strength of this study is that it uses full life tables, for males and females, for seventeen high-income countries for an extended time series. The detailed results allow for tracking the magnitude and timing of US divergence. This provides a specific criterion for assessing the explanatory power of causes proposed for poor performance, and narrows the range of potentially important determinants.

- 1  
2  
3  
4  
5  
6  
7  
8  
9  
10  
11  
12  
13  
14  
15  
16  
17  
18  
19  
20  
21  
22  
23  
24  
25  
26  
27  
28  
29  
30  
31  
32  
33  
34  
35  
36  
37  
38  
39  
40  
41  
42  
43  
44  
45  
46  
47  
48  
49  
50  
51  
52  
53  
54  
55  
56  
57  
58  
59  
60
- The main limitation of this study is that it does not propose explanations for high relative US mortality today and why the mortality gap emerged and grew, as it is instead a tool for others making those assessments. Concern for the poor US performance on mortality prompted major investigations by the US National Academy of Sciences into its causes, and it was not our purpose to reiterate the conclusions of the US National Academies' assessments.

## Introduction

Much has been said and debated about the differences in health outcomes among high-income countries. Using different measures of health, mortality and disability, many studies have documented that the population of the United States is less healthy than those of the high-income nations in Europe and Australasia. This finding of poorer US health outcomes relative to other nations plays a significant part in public debate over improving US health outcomes.<sup>1</sup> This paper adds to the previous discussion by quantifying how many years behind its comparators the US has fallen and by exploring whether there was a particular time when US mortality rates began to diverge from the others. Identification of such a time would provide clues about where to look for potential causes and remedies.

The metric used to assess performance must be able to capture variation across countries and over time. In this paper we apply a long-established approach to performance measurement that lends itself readily to graphic depiction: the assessment of how many “years behind” a country has fallen, relative to other countries.<sup>2,3</sup> We compare the life expectancy (and age-specific mortality rates) for men and women in the US with the best country life expectancy (“leader”) and figures from sixteen other high-income countries in the Organisation for Economic Co-operation and Development (OECD) (“comparators”), from 1958-2007, using data primarily from the Human Mortality Database.<sup>4</sup> This dynamic depiction also captures the magnitude of the effort needed to catch-up with other participants. Evolution over time of years behind enables sensitive identification of divergent and convergent trends, and the ability to flag rapid changes on the path to improvement in life expectancy. This capacity underpins an important purpose

1  
2  
3 of this paper, which is to identify whether there is a point in time marking the beginning  
4  
5 of US deterioration relative to its comparators.  
6  
7  
8

## 9 10 **Design**

### 11 12 13 *Data*

14  
15 We use full life tables encompassing the years 1850 through 2007,<sup>4</sup> for males and  
16  
17 females, for the following seventeen countries: Australia, Austria, Canada, Denmark,  
18  
19 Finland, France, Germany (West Germany), Italy, Japan, Netherlands, Norway, Portugal,  
20  
21 Spain, Sweden, Switzerland, the United Kingdom, and the United States. This set of  
22  
23 countries is a subset of high-income OECD countries chosen for best comparability to the  
24  
25 US. The selection criteria were sufficient population size to ensure stability of estimates,  
26  
27 high development achieved for a long time period, data quality and availability, and were  
28  
29 described elsewhere.<sup>5</sup> We extract the life expectancy at birth for males and females, and  
30  
31 the mortality rates for each five-year age group from birth up to age 80 (0-4, 5-9, 10-  
32  
33 14,..., 70-74, 75-79), and additionally for the specific age ranges 0-14 and 15-49.  
34  
35  
36  
37  
38  
39  
40  
41  
42

### 43 44 *Approach*

45  
46 We report life expectancy at birth for males and females for all seventeen countries, for  
47  
48 the period 1958-2007.<sup>a</sup> In keeping with published methodology, for each year we identify  
49  
50 the highest recorded life expectancy i.e. the leader.<sup>1,6,7</sup> These point estimates define a  
51  
52 ‘maximum frontier.’ We also estimate the average life expectancy recorded for the  
53  
54

---

55  
56  
57 <sup>a</sup> The latest year available for the United States was 2007. The earliest available year for West Germany  
58 was 1956. We retained the years 1958 to 2007 in order to have five 10-year periods.  
59  
60

1  
2  
3 sixteen countries (arithmetic average), besides the US, i.e. the comparators. Finally, we  
4  
5 compare the US life expectancy to both the leader and the comparators. We do this by  
6  
7 calculating how many years behind the leader the US and the comparators fall in a given  
8  
9 year. For instance, if in 2007 the US had a life expectancy which was closest to the life  
10  
11 expectancy of the leader in 1986, then the US is said to have been 21 years behind the  
12  
13 leader in 2007.  
14  
15

16  
17 In order to investigate to what extent the health gap varies across different age  
18  
19 groups, we analyze mortality rates for males and females for the age groups described  
20  
21 above, for the period 1958-2007. Similarly, we identify the leader of the lowest recorded  
22  
23 mortality rates in a given year, which define a 'minimum frontier,' and compute the  
24  
25 comparators' average observed mortality rates per age group. Note that this leader is not  
26  
27 necessarily the same as the leader in life expectancy. Finally, we calculate how many  
28  
29 years behind the US and the comparators are for each age group and each year of the  
30  
31 period 1958-2007.  
32  
33  
34  
35  
36  
37

## 38 **Results**

### 39 *Years behind for life expectancy*

40  
41  
42  
43 Figure 1.a shows, over the period 1958-2007, for male and female life expectancy, the  
44  
45 evolution of the leader, the US and the comparators. In any given year, the leader, the US  
46  
47 and the comparators had higher life expectancies for females than for males. The US life  
48  
49 expectancy for males was lower than the comparators' life expectancy for males; the  
50  
51 differential of life expectancy between the US and the leader diminished from the late  
52  
53 1950s to the late 1970s, and then stayed about the same after the late 1970s. For females,  
54  
55  
56  
57  
58  
59  
60



1  
2  
3 the US life expectancy was about the same as the comparators from the late 1950s to the  
4  
5 late 1970s, and both converged slightly toward the leader. Notably, after the late 1970s,  
6  
7 the life expectancy for US females started to diverge substantially from both the leader  
8  
9 and the comparators; the US presented a rate of increase of about 1 year per decade, far  
10  
11 below the 2-3 years per decade of the leader. Tables A.1 and A.2 in the Supplementary  
12  
13 Appendix show, for males and females, the life expectancy across countries for each  
14  
15 decade from 1958.  
16  
17  
18  
19  
20  
21

22 FIGURE 1 AROUND HERE  
23  
24  
25  
26

27 The number of years behind the leader, for male and female life expectancy, for  
28  
29 the US and the comparators, is presented in figure 1.b. Over the period 1958-2007, the  
30  
31 US fell between 15 and 35 years behind the leader for male life expectancy, and was also  
32  
33 always behind the comparators. Up to about the late 1970s, both the US and the  
34  
35 comparators presented a similar trend in increasing years behind the leader. Then, over  
36  
37 the course of only a few years, the comparators narrowed the distance from 25 to 10  
38  
39 years behind, followed by a slightly decreasing trend until 2007 where it was about 5  
40  
41 years behind the leader. In contrast, the US narrowed the distance with the leader  
42  
43 abruptly in the late 1980s (slightly delayed relative to the comparators), and then  
44  
45 remained at about the same level of 20 years behind the leader through 2007 leading to  
46  
47 substantial divergence from the comparators. In the first two decades (1958-67 and 1968-  
48  
49 77), Sweden was the leader (with mean life expectancy of 71.6 and 72.1 years), but its  
50  
51 advance on Japan diminished (14<sup>th</sup> and 6<sup>th</sup> positions with mean life expectancy of 66.7  
52  
53 and 70.7 years) (Supplementary Appendix, table A.1). Japanese male life expectancy  
54  
55  
56  
57  
58  
59  
60

1  
2  
3 increased dramatically from 1958-67 to 1978-87, at about 4 years per decade, about 4  
4  
5 times Sweden's rate of increase. Japan has been the leader for the last three decades,  
6  
7 although, Sweden and a few other countries kept very close pace behind. Australia and  
8  
9 Italy have substantially closed the gap in recent decades, moving from 8<sup>th</sup> and 9<sup>th</sup>  
10  
11 positions behind Japan in 1978-87, to 2<sup>nd</sup> and 5<sup>th</sup> in 1998-07, respectively.  
12  
13

14  
15 Over the period 1958-2007, the life expectancy for US females was between 10  
16  
17 and 20 years behind the leader, which was better than US male life expectancy but hid a  
18  
19 disturbing trend (figure 1.b). Up to about the late 1970s, US females and the comparators  
20  
21 presented similar trajectories: starting around 10 years behind the leader, they trailed to  
22  
23 around 20, but made a comeback to where they were, again, about 10 years behind the  
24  
25 leader. Then, the US substantially diverged from the comparators, falling further and  
26  
27 further behind at a steady pace (figure 1.b). In 1998-07, the US was about 19 years  
28  
29 behind the leader, with a life expectancy of 79.9 years (Supplementary Appendix, table  
30  
31 A.2). Over the last three decades, Japan has been the leader, and its distance ahead of the  
32  
33 comparators has increased. In 1978-87 the 2<sup>nd</sup> best country (Switzerland) had life  
34  
35 expectancy of 0.2 years less than Japan's, whereas in 1998-07 the 2<sup>nd</sup> (France) had life  
36  
37 expectancy of 1.8 years less than Japan's. Japanese female life expectancy increased  
38  
39 dramatically from 1958-67 to 1978-87: Japanese were 16<sup>th</sup> behind the leader (Norway) in  
40  
41 1958-67 with a life expectancy of 71.7 years, before taking the lead in 1978-87 with a life  
42  
43 expectancy of 79.8 years, a rate of increase of 4 years per decade. Norway and Denmark  
44  
45 lost ground from 1968-77 onward. Norway led in 1968-77 but ranked 9<sup>th</sup> in 1998-07, a  
46  
47 rate of increase of only 1.5 years per decade. Denmark was 8<sup>th</sup> in 1968-77 but fell to last  
48  
49 in 1998-07, with a rate of increase of only 1 year per decade.  
50  
51  
52  
53  
54  
55  
56  
57  
58  
59  
60

*Years behind in age-specific mortality rates.*

Figure 2 shows the number of years behind the leader the US and the comparators were for 5-year age groups, for males and females and two time periods, the early 1960s (1958-67) and the early 2000s (1998-07). In the early 1960s, the US and the comparators presented similar age distributions for the number of years behind the leader, for males and females. Males presented a larger number of years behind than females across almost all age groups; females in both the US and the comparators presented almost identical age distributions for years behind the leader. The situation in the early 2000s was very different for the US. For females, the comparators presented a pattern similar to the early 1960s, between 10 and 20 years behind the leader across all age groups; the US presented a larger number of years behind the leader but most significantly the number of years behind the leader had increased substantially between age 15 and age 50. For males, the comparators had substantially reduced the number of years behind the leader beyond age 45, but increased the number of years behind the leader from age 15 to age 40; the US had also substantially reduced the number of years behind the leader after age 45, and like the comparators, had increased the number of years behind the leader between age 10 and age 45.

FIGURE 2 AROUND HERE

Figure 3.a shows time trends in the probability of dying between age birth and age 15 (15q0) for the leader, the US and the comparators. Tables A.3 and A.4 in the Supplementary Appendix show values for 15q0 across countries. In a given year, the leader, the US and the comparators had higher mortality rates for males than for females.

1  
2  
3 For both males and females, the differential of 15q0 between the US and the leader  
4 stayed somewhat similar from the early 1960s to the early 2000s. The US 15q0 started  
5 lower than the comparators' 15q0 for both males and females; in the 1970s, the leader,  
6 the US and the comparators crossed. For both males and females, the comparators' 15q0  
7 was converging toward the leader throughout the entire time period.  
8  
9  
10  
11  
12  
13

14  
15  
16  
17 FIGURE 3 AROUND HERE; FIGURE 4 AROUND HERE  
18  
19  
20  
21

22 Figure 4.a shows time trends for the probability of dying between age 15 and age  
23 50 (35q15) for the leader, the US and the comparators. Tables A.5 and A.6 in the  
24 Supplementary Appendix show values for 35q15 across countries. In a given year, the  
25 leader, the US and the comparators had substantially higher mortality rates for males than  
26 for females. For both males and females, the US 35q15 was always higher than the  
27 comparators' 35q15; the differential of 35q15 between the US and the leader stayed  
28 about the same from 1958 to 2007, for males. However, for females, the US was slightly  
29 diverging from the leader from 1980 onward.  
30  
31  
32  
33  
34  
35  
36  
37  
38  
39

40 Figures 3.b and 4.b show the number of years behind the leader the US and the  
41 comparators were for the 0-14 and 15-49 age groups, for males and females, over the  
42 1958-2007 period. For the 0-14 age group, up to the late 1970s, the US and the  
43 comparators showed similar trajectories, between 10 and 20 years behind the leader (both  
44 males and females); on average, the US was slightly ahead of the comparators then.  
45 Afterwards, while the comparators consistently kept pace about 10 years behind the  
46 leader, the US saw an increase up to between 20 and 30 years behind the leader through  
47 2007 (both males and females). For the 15-49 age group, the US was always behind the  
48  
49  
50  
51  
52  
53  
54  
55  
56  
57  
58  
59  
60

1  
2  
3 comparators over the whole period; the US consistently diverged from the leader. The  
4  
5 male trajectory, for the US and the comparators, was similar until the early 1990s, when  
6  
7 the comparators started converging on the leader, dropping from about 40 to 15 years  
8  
9 behind the leader in 2007; meanwhile, the US kept diverging with years behind the leader  
10  
11 increasing from about 45 years in 1990 to about 55 years in 2007. The female trajectory,  
12  
13 for the US and the comparators, was somewhat similar until the mid-1970s (20-25 years  
14  
15 behind the leader then), when the comparators kept the distance behind the leader below  
16  
17 20 years behind the leader (below 10 years behind the leader in 2007), while the US  
18  
19 continued diverging, being about 50 years behind the leader in 2007.  
20  
21  
22  
23  
24  
25  
26

## 27 **Discussion**

28  
29 This paper applies a sensitive measure of national performance – years behind – to  
30  
31 comparison of US mortality rates with those of other high-income countries. As has been  
32  
33 well documented,<sup>1,8</sup> US life expectancy is lower and mortality rates are higher than in  
34  
35 other high-income or comparator countries. Most strikingly, for both males and females,  
36  
37 the typical high-income country had achieved, by the 1970s, a mortality rate in the age  
38  
39 group 15-49 that the US failed to achieve until about 2007: i.e., the US, in 2007 fell about  
40  
41 40 years behind the average (and 50 years behind the leader). A similar if less  
42  
43 pronounced pattern appears for life expectancy and for mortality under age 15.  
44  
45  
46  
47

48 The US now lies far behind other high-income countries, but this was not always  
49  
50 so. The detailed results of this paper allow for tracking the magnitude of US divergence  
51  
52 and for (approximate) timing of when it began. Although our results contain noise a key  
53  
54 result emerges: sometime in the late 1970s the US stopped tracking its comparators and  
55  
56  
57  
58  
59  
60

1  
2  
3 began to fall behind (table 1). At different rates for different indicators the US fell further  
4  
5 and further behind over subsequent three decades.  
6  
7  
8  
9

10 TABLE 1 AROUND HERE  
11  
12  
13

14  
15 Concern for the poor US performance on mortality prompted major investigations  
16  
17 by the US National Academy of Sciences<sup>1,8</sup> into its nature (in terms of age groups and  
18  
19 conditions) and its causes. Major potential causes that have been explored include cross-  
20  
21 country differences in the level and equality of income, in level of education, in social  
22  
23 cohesion, in a broad range of specific risk factors, and in the level and quality of  
24  
25 expenditures on the health care system. It is not our purpose to reiterate the conclusions  
26  
27 of the National Academies' assessments. Rather our conclusions point to an additional  
28  
29 and quite specific criterion for judging the explanatory power of potential explanations  
30  
31 for poor performance in the US. Since we conclude divergence to have begun in the late  
32  
33 1970s, potential explanations like racial diversity, lack of health insurance and high  
34  
35 income inequality in the US become less plausible. Racial diversity and income  
36  
37 inequality were high, and insurance coverage low in the US in the 1970s when the US  
38  
39 was performing well on health. Establishing a time for the beginning of the US  
40  
41 divergence helps in identifying the effects of the broader social policy arena on health,<sup>9</sup>  
42  
43 and in narrowing the range of potentially important determinants, and remedies.  
44  
45  
46  
47  
48  
49  
50  
51

## 52 **Acknowledgements** 53

54  
55 The authors gratefully acknowledge funding from the Bill & Melinda Gates Foundation  
56  
57 through the Disease Control Priorities Network grant to the University of Washington  
58  
59  
60

1  
2  
3 and from the National Research Council of the United States National Academies. The  
4  
5 authors received valuable comments from Laudy Aron.  
6  
7  
8  
9

### 10 **Contributors**

11  
12 SV and DTJ designed the study, conducted the analysis, interpreted the data and drafted  
13  
14 the original manuscript. Both authors fulfill the ICMJE guidelines for authorship.  
15  
16  
17  
18  
19

### 20 **Funding**

21  
22 This work was supported by the Bill & Melinda Gates Foundation through the Disease  
23  
24 Control Priorities Network grant to the University of Washington, and by the National  
25  
26 Research Council of the United States National Academies.  
27  
28  
29  
30

### 31 **Competing interests**

32  
33 None declared  
34  
35  
36  
37

### 38 **Data sharing statement**

39  
40 There is no additional data available.  
41  
42  
43  
44  
45  
46  
47  
48  
49  
50  
51  
52  
53  
54  
55  
56  
57  
58  
59  
60

## References

1. Crimmins EM, Preston SH, Cohen B, editors. *Explaining divergent levels of longevity in high-income countries*. Washington, DC: National Academies Press, 2011.
2. Sicherl P. Time-distance as a dynamic measure of disparities in social and economic development. *Kyklos* 1973; 26(3):559-575.
3. Kulkarni SC, Levin-Rector A, Ezzati M, Murray CJL. Falling behind: life expectancy in US counties from 2000 to 2007 in an international context. *Population Health Metrics* 2011; 9(1):16.
4. Human Mortality database. <http://www.mortality.org/> (accessed 30 Aug 2011).
5. Ho JH, Preston SH. US mortality in an international context: age variations. *Population and Development Review* 2010; 36(4):749-773.
6. Oeppen J, Vaupel JW. Broken limits to life expectancy. *Science* 2002; 296:1029-31.
7. Vallin J, Meslé F. The segmented trend line of highest life expectancies, *Population and Development Review* 2009; 35(1):159-187.
8. Woolf S, Aron L, editors. *US health in international perspectives: shorter lives, poorer health*. Washington, DC: National Academies Press, 2013.
9. Dow WH, Rehkopf DH. Socioeconomic gradients in health in international and historical context. *Annals of the New York Academy of Sciences* 2010; 1186:24-36.



**Figure 1.** Evolution of life expectancy and years behind the leader for the leader, the US, and the average of sixteen comparator high-income countries, males and females, 1958-2007

(a) Life expectancy

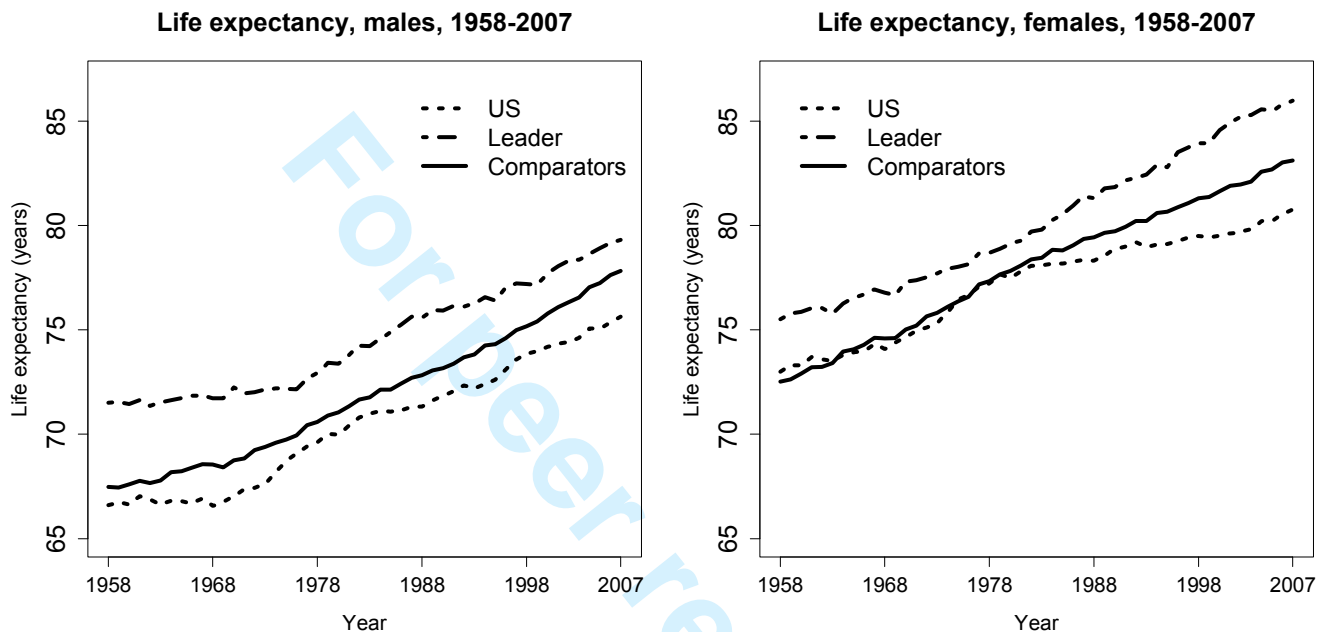

(b) Years behind the leader

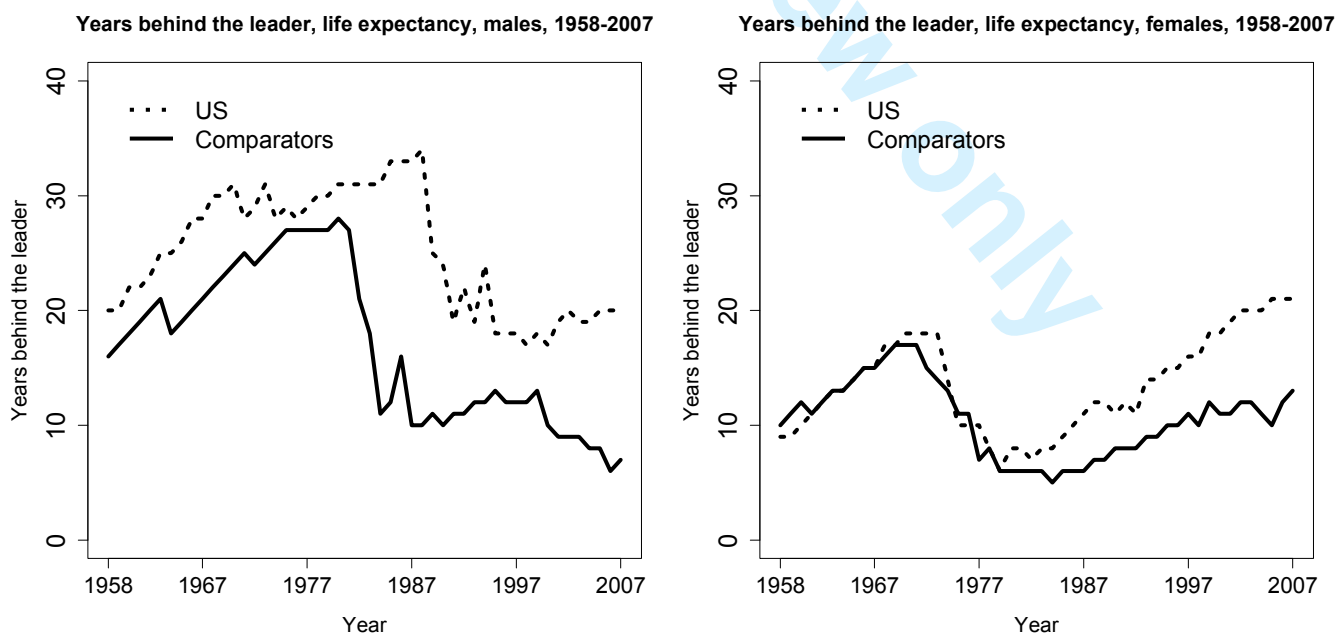

**Figure 2.** Number of years behind the leader for mortality rates across age groups, for the US and the average of sixteen comparator high-income countries, males and females, early 1960s and early 2000s

(a) Males

Years behind the leader, mortality rates, males, early 1960s

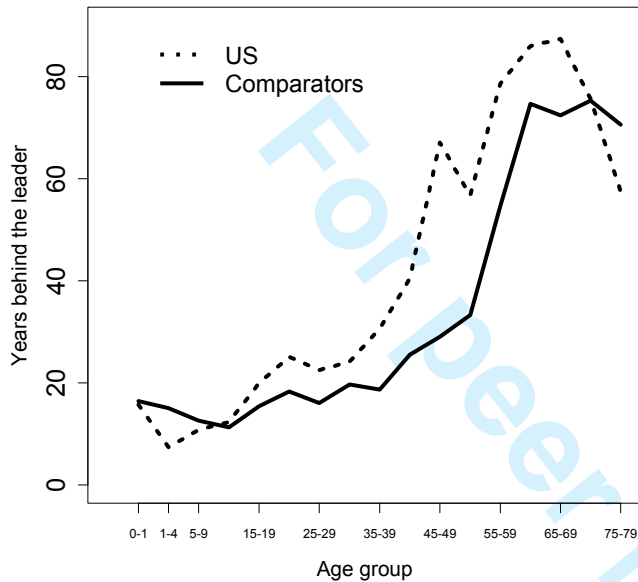

Years behind the leader, mortality rates, males, early 2000s

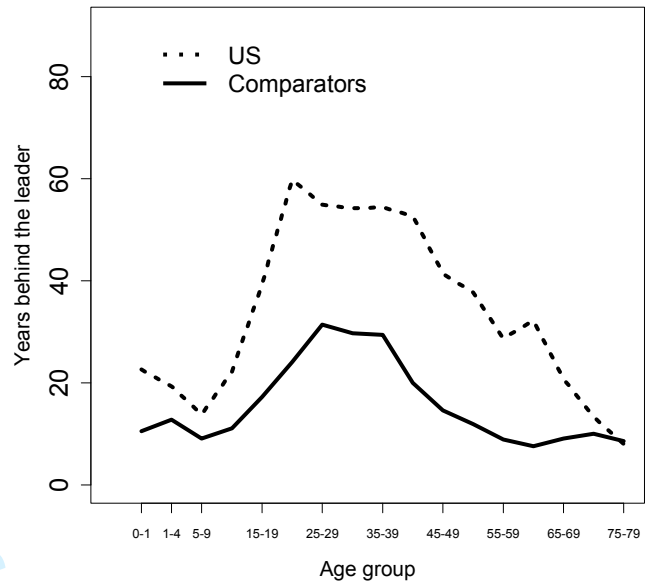

(b) Females

Years behind the leader, mortality rates, females, early 1960s

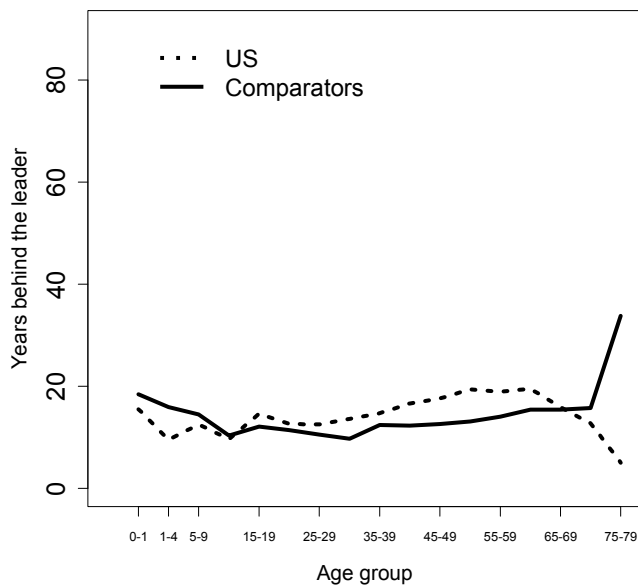

Years behind the leader, mortality rates, females, early 2000s

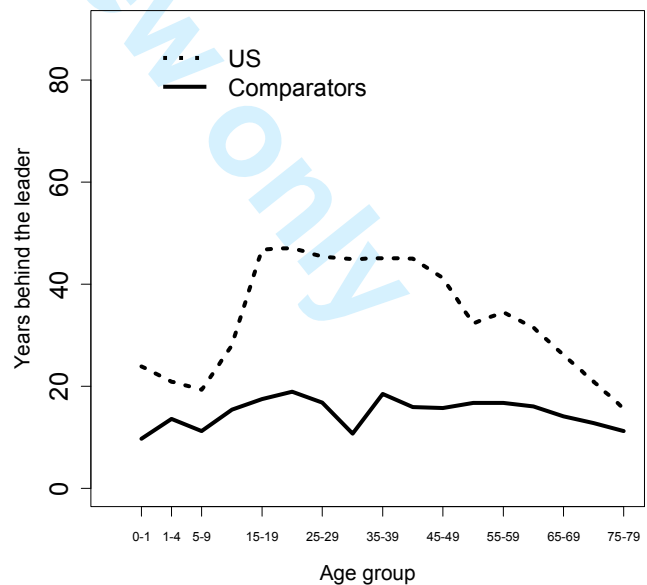

Note: Early 1960s refers to the period 1958-67 and early 2000s refers to 1998-2007.

**Figure 3.** Evolution of mortality rates and years behind the leader in the 0-14 age group, for the leader, the US, and the average of sixteen comparator high-income countries, males and females, 1958-2007

(a) Mortality rates

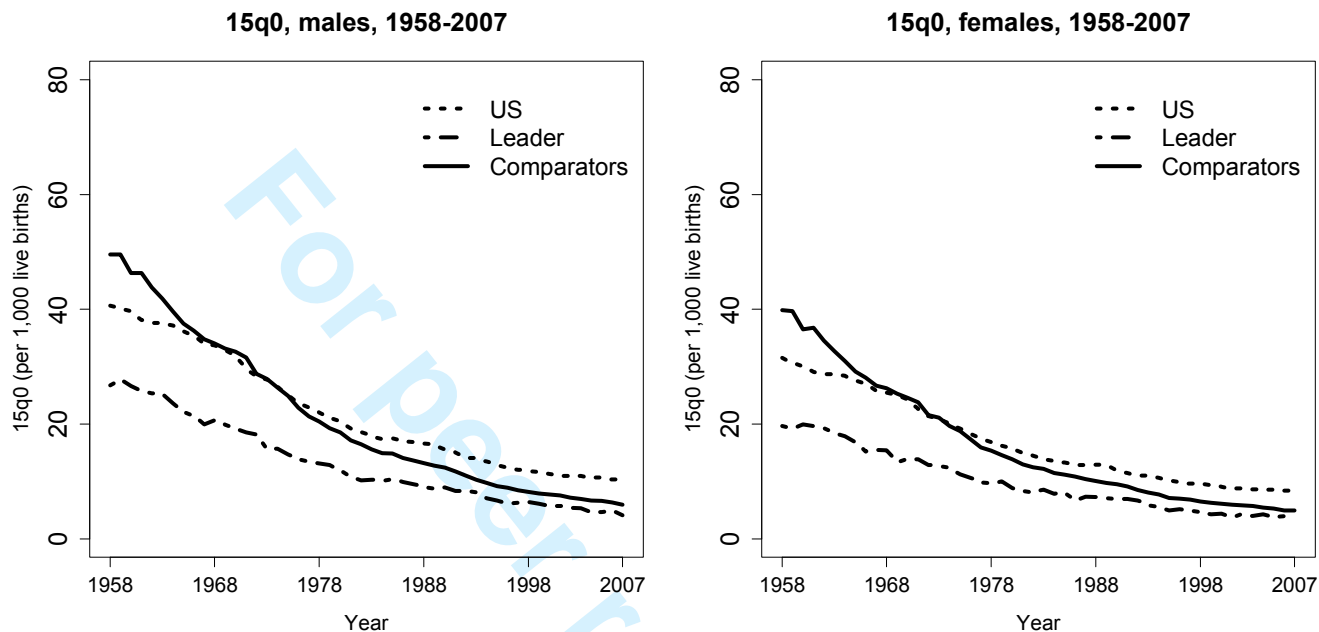

(b) Years behind the leader

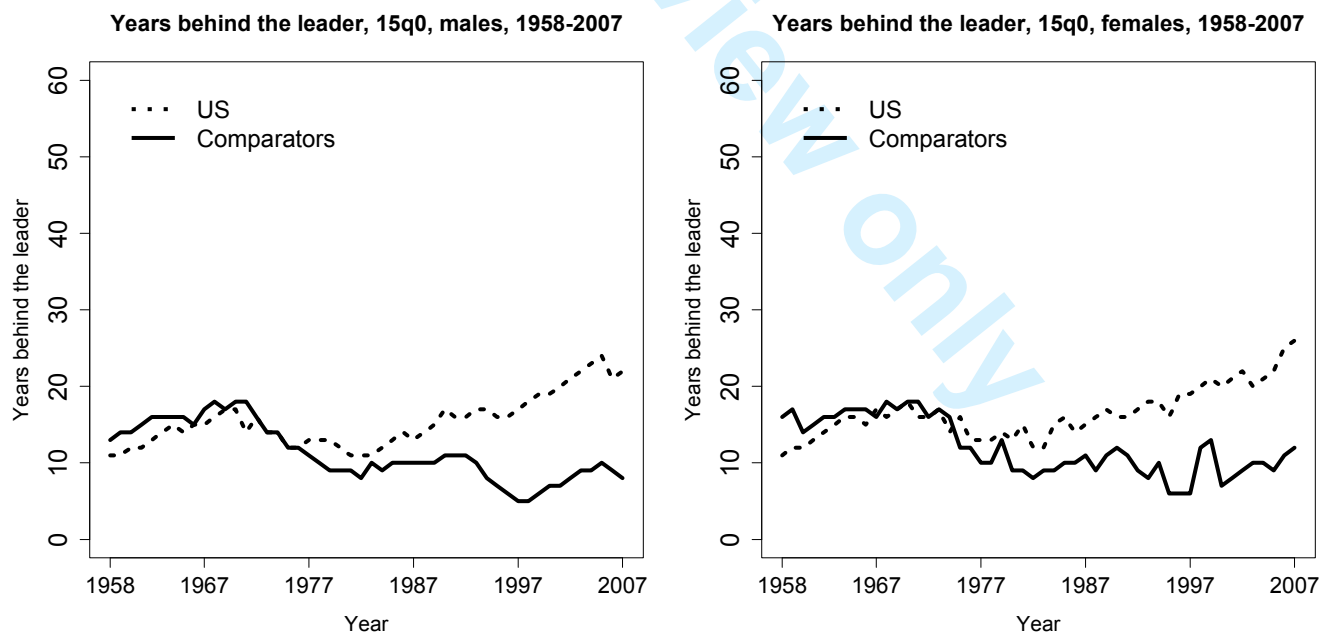

Note: 15q0 is defined as the probability of dying from birth through age 14 at then prevailing age-specific mortality rates.

**Figure 4.** Evolution of mortality rates and years behind the leader in the 15-49 age group, for the leader, the US, and the average of sixteen comparator high-income countries, males and females, 1958-2007

(a) Mortality rates

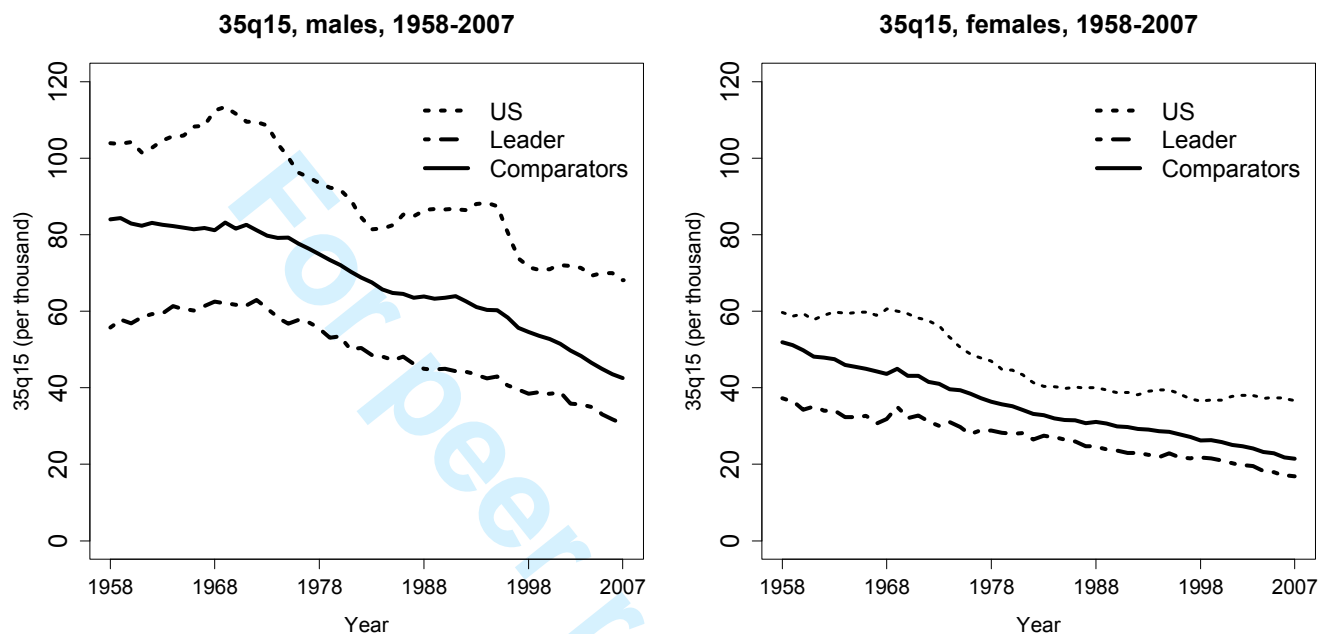

(b) Years behind the leader

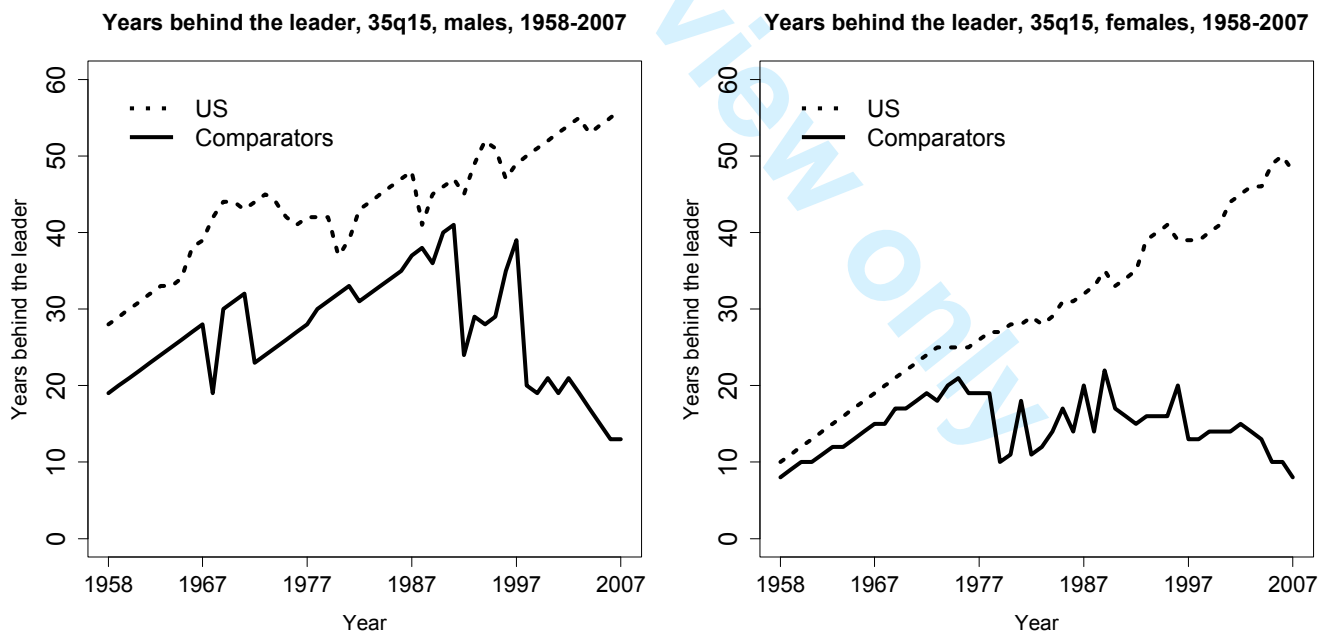

Note: 35q15 is defined as the probability of dying from age 15 through age 49 at then prevailing age-specific mortality rates.

**Table 1.** Timing of US divergence from the average of sixteen comparator high-income countries, for life expectancy, 15q0, and 35q15, males and females, 1958-2007

| Indicator       | Males                                                                         | Females                                                             |
|-----------------|-------------------------------------------------------------------------------|---------------------------------------------------------------------|
| Life expectancy | Late 1970s<br>(temporary reconvergence late '80s to late '90s)                | Late 1970s                                                          |
| 15q0            | Late 1970s<br>(US had lower mortality than comparators before 1965)           | Late 1970s<br>(US had lower mortality than comparators before 1965) |
| 35q15           | About 1990<br>(US already substantially behind comparators before divergence) | Late 1970s<br>(more rapid divergence after about 1990)              |

Note: 15q0 is defined as the probability of dying from birth through age 14 at then prevailing age-specific mortality rates; 35q15 is defined as the probability of dying from age 15 through age 49 at then prevailing age-specific mortality rates.

### Supplementary Appendix

**Table A.1.** Evolution of male life expectancy for the US, and sixteen other high-income countries, 1958-67 to 1998-2007

**Table A.2.** Evolution of female life expectancy for the US, and sixteen other high-income countries, 1958-67 to 1998-2007

**Table A.3.** Evolution of male 15q0 for the US, and sixteen other high-income countries, 1958-67 to 1998-2007

**Table A.4.** Evolution of female 15q0 for the US, and sixteen other high-income countries, 1958-67 to 1998-2007

**Table A.5.** Evolution of male 35q15 for the US, and sixteen other high-income countries, 1958-67 to 1998-2007

**Table A.6.** Evolution of female 35q15 for the US, and sixteen other high-income countries, 1958-67 to 1998-2007

**Table A.1.** Evolution of male life expectancy for the US, and sixteen other high-income countries, 1958-67 to 1998-2007

| Life expectancy (years) | 1958-67                                                                                                                                                             | 1966-77                                                                                                                                 | 1978-87                                                                                                                                                                                         | 1988-97                                                                                                                                                                                                                     | 1998-07                                                                                                                                                                                         |
|-------------------------|---------------------------------------------------------------------------------------------------------------------------------------------------------------------|-----------------------------------------------------------------------------------------------------------------------------------------|-------------------------------------------------------------------------------------------------------------------------------------------------------------------------------------------------|-----------------------------------------------------------------------------------------------------------------------------------------------------------------------------------------------------------------------------|-------------------------------------------------------------------------------------------------------------------------------------------------------------------------------------------------|
| Above 80                |                                                                                                                                                                     |                                                                                                                                         |                                                                                                                                                                                                 |                                                                                                                                                                                                                             |                                                                                                                                                                                                 |
| 75 to 80                |                                                                                                                                                                     |                                                                                                                                         |                                                                                                                                                                                                 | JPN (76.3)                                                                                                                                                                                                                  | JPN (78.2)<br>AUS (77.9)<br>SWE (77.9)<br>CHE (77.9)<br>ITA (77.3)<br>CAN (77.2)<br>NOR (76.8)<br>ESP (76.4)<br>NLD (76.4)<br>UK (76.1)<br>FRA (76.0)<br>DEU (76.0)<br>AUT (75.9)<br>DNK (75.0) |
| 70 to 75                | SWE (71.6)<br>NLD (71.2)<br>NOR (71.2)<br>DNK (70.4)                                                                                                                | SWE (72.1)<br>NOR (71.4)<br>NLD (71.3)<br>DNK (71.0)<br>CHE (70.8)<br>JPN (70.7)                                                        | JPN (74.2)<br>SWE (73.4)<br>CHE (72.9)<br>NLD (72.8)<br>ESP (72.7)<br>NOR (72.5)<br>CAN (72.4)<br>AUS (71.8)<br>ITA (71.6)<br>DNK (71.5)<br>UK (71.1)<br>FRA (70.8)<br>DEU (70.7)<br>USA (70.7) | SWE (75.5)<br>CHE (74.8)<br>AUS (74.6)<br>CAN (74.6)<br>NLD (74.2)<br>NOR (74.2)<br>ITA (74.2)<br>ESP (74.0)<br>UK (73.5)<br>FRA (73.3)<br>DEU (73.2)<br>AUT (72.8)<br>DNK (72.6)<br>USA (72.3)<br>FIN (72.0)<br>PRT (71.3) | FIN (74.8)<br>USA (74.7)<br>PRT (74.1)                                                                                                                                                          |
| 65 to 70                | CHE (68.9)<br>CAN (68.4)<br>UK (68.1)<br>AUS (67.8)<br>ESP (67.4)<br>FRA (67.3)<br>ITA (67.2)<br>DEU (67.2)<br>USA (66.8)<br>JPN (66.7)<br>AUT (66.2)<br>FIN (65.5) | ESP (69.8)<br>CAN (69.7)<br>ITA (69.1)<br>UK (69.1)<br>FRA (68.6)<br>AUS (68.5)<br>DEU (67.9)<br>USA (67.8)<br>AUT (67.3)<br>FIN (66.7) | FIN (69.9)<br>AUT (69.7)<br>PRT (69.0)                                                                                                                                                          |                                                                                                                                                                                                                             |                                                                                                                                                                                                 |
| Below 65                | PRT (61.6)                                                                                                                                                          | PRT (64.9)                                                                                                                              |                                                                                                                                                                                                 |                                                                                                                                                                                                                             |                                                                                                                                                                                                 |

AUS = Australia, AUT = Austria, CAN = Canada, CHE = Switzerland, DEU = West Germany, DNK = Denmark, ESP = Spain, FIN = Finland, FRA = France, ITA = Italy, JPN = Japan, NLD = Netherlands, NOR = Norway, PRT = Portugal, SWE = Sweden, UK = United Kingdom, USA = United States.

Source: Human Mortality Database.

**Table A.2.** Evolution of female life expectancy for the US, and sixteen other high-income countries, 1958-67 to 1998-2007

| Life expectancy (years) | 1958-67    | 1968-77    | 1978-87    | 1988-97    | 1998-07    |
|-------------------------|------------|------------|------------|------------|------------|
| Above 80                |            |            |            | JPN (82.5) | JPN (85.1) |
|                         |            |            |            | FRA (81.4) | FRA (83.3) |
|                         |            |            |            | CHE (81.4) | CHE (83.2) |
|                         |            |            |            | ESP (81.2) | ESP (83.2) |
|                         |            |            |            | SWE (80.9) | ITA (83.1) |
|                         |            |            |            | CAN (80.8) | AUS (82.9) |
|                         |            |            |            | ITA (80.8) | SWE (82.4) |
|                         |            |            |            | AUS (80.6) | CAN (82.2) |
|                         |            |            |            | NLD (80.2) | NOR (81.9) |
|                         |            |            |            | NOR (80.2) | FIN (81.8) |
|                         |            |            |            |            | AUT (81.7) |
|                         |            |            |            |            | DEU (81.6) |
|                         |            |            |            |            | NLD (81.1) |
|                         |            |            |            |            | PRT (80.9) |
|                         |            |            |            |            | UK (80.7)  |
| 75 to 80                | NOR (76.1) | NOR (77.6) | JPN (79.8) | DEU (79.6) | USA (79.9) |
|                         | NLD (75.8) | SWE (77.5) | CHE (79.6) | FIN (79.6) | DNK (79.7) |
|                         | SWE (75.6) | NLD (77.2) | SWE (79.4) | AUT (79.4) |            |
|                         |            | CHE (77.0) | NLD (79.4) | USA (79.0) |            |
|                         |            | CAN (76.8) | CAN (79.3) | UK (78.9)  |            |
|                         |            | DNK (76.4) | NOR (79.2) | PRT (78.5) |            |
|                         |            | FRA (76.3) | ESP (79.0) | DNK (77.9) |            |
|                         |            | JPN (75.9) | FRA (79.0) |            |            |
|                         |            | ESP (75.5) | AUS (78.6) |            |            |
|                         |            | USA (75.5) | FIN (78.3) |            |            |
|                         |            | AUS (75.4) | ITA (78.2) |            |            |
|                         |            | UK (75.3)  | USA (77.9) |            |            |
|                         |            | ITA (75.2) | DNK (77.5) |            |            |
|                         |            | FIN (75.1) | DEU (77.3) |            |            |
|                         |            |            | UK (77.0)  |            |            |
|                         |            |            | AUT (76.7) |            |            |
|                         |            |            | PRT (75.9) |            |            |
| 70 to 75                | CAN (74.6) | DEU (74.3) |            |            |            |
|                         | CHE (74.6) | AUT (74.2) |            |            |            |
|                         | DNK (74.5) | PRT (71.5) |            |            |            |
|                         | FRA (74.2) |            |            |            |            |
|                         | AUS (74.2) |            |            |            |            |
|                         | UK (74.1)  |            |            |            |            |
|                         | USA (73.6) |            |            |            |            |
|                         | DEU (72.8) |            |            |            |            |
|                         | FIN (72.6) |            |            |            |            |
|                         | ITA (72.5) |            |            |            |            |
|                         | AUT (72.5) |            |            |            |            |
|                         | ESP (72.5) |            |            |            |            |
|                         | JPN (71.7) |            |            |            |            |
| 65 to 70                | PRT (67.5) |            |            |            |            |

AUS = Australia, AUT = Austria, CAN = Canada, CHE = Switzerland, DEU = West Germany, DNK = Denmark, ESP = Spain, FIN = Finland, FRA = France, ITA = Italy, JPN = Japan, NLD = Netherlands, NOR = Norway, PRT = Portugal, SWE = Sweden, UK = United Kingdom, USA = United States.

Source: Human Mortality Database.



**Table A.3.** Evolution of male 15q0 for the US, and sixteen other high-income countries, 1958-67 to 1998-2007 (per 1,000 live births)

|  | 1958-67   | 1968-77  | 1978-87  | 1988-97  | 1998-07  |
|--|-----------|----------|----------|----------|----------|
|  | SWE (24)  | SWE (17) | SWE (11) | SWE (8)  | SWE (5)  |
|  | NLD (28)  | NLD (21) | FIN (12) | JPN (8)  | JPN (6)  |
|  | NOR (29)  | NOR (21) | JPN (12) | FIN (9)  | FIN (6)  |
|  | DNK (31)  | FIN (21) | DNK (14) | DEU (10) | NOR (6)  |
|  | AUS (31)  | DNK (21) | CHE (14) | NOR (10) | ITA (6)  |
|  | FIN (32)  | JPN (22) | NOR (14) | CHE (10) | DEU (7)  |
|  | UK (32)   | CHE (23) | NLD (14) | NLD (10) | AUT (7)  |
|  | CHE (33)  | FRA (25) | CAN (16) | CAN (11) | FRA (7)  |
|  | FRA (37)  | UK (26)  | FRA (16) | DNK (11) | ESP (7)  |
|  | USA (38)  | AUS (26) | AUS (17) | AUT (11) | DNK (7)  |
|  | CAN (39)  | CAN (27) | UK (17)  | FRA (11) | CHE (7)  |
|  | JPN (43)  | USA (28) | DEU (18) | AUS (11) | NLD (8)  |
|  | DEU (43)  | DEU (32) | ESP (18) | UK (11)  | AUS (8)  |
|  | AUT (47)  | ESP (34) | USA (19) | ESP (11) | CAN (8)  |
|  | ITA (56)  | AUT (34) | ITA (19) | ITA (11) | UK (8)   |
|  | ESP (59)  | ITA (36) | AUT (20) | USA (14) | PRT (9)  |
|  | PRT (116) | PRT (69) | PRT (33) | PRT (18) | USA (11) |

AUS = Australia, AUT = Austria, CAN = Canada, CHE = Switzerland, DEU = West Germany, DNK = Denmark, ESP = Spain, FIN = Finland, FRA = France, ITA = Italy, JPN = Japan, NLD = Netherlands, NOR = Norway, PRT = Portugal, SWE = Sweden, UK = United Kingdom, USA = United States.

Source: Human Mortality Database.

Note: 15q0 is defined as the probability of dying from birth through age 14 at then prevailing age-specific mortality rates.

**Table A.4.** Evolution of female 15q0 for the US, and sixteen other high-income countries, 1958-67 to 1998-2007 (per 1,000 live births)

|  | 1958-67   | 1968-77  | 1978-87  | 1988-97  | 1998-07 |
|--|-----------|----------|----------|----------|---------|
|  | SWE (18)  | SWE (13) | FIN (9)  | SWE (6)  | SWE (4) |
|  | NLD (21)  | NOR (15) | SWE (9)  | JPN (7)  | FIN (5) |
|  | NOR (21)  | DNK (15) | JPN (9)  | FIN (7)  | JPN (5) |
|  | DNK (22)  | FIN (15) | CHE (10) | NOR (8)  | NOR (5) |
|  | FIN (24)  | NLD (15) | DNK (10) | DEU (8)  | FRA (5) |
|  | AUS (24)  | JPN (16) | NOR (11) | CHE (8)  | ITA (6) |
|  | CHE (24)  | CHE (17) | NLD (11) | NLD (8)  | DEU (6) |
|  | UK (25)   | FRA (19) | FRA (12) | FRA (8)  | AUT (6) |
|  | FRA (29)  | UK (19)  | CAN (12) | DNK (8)  | DNK (6) |
|  | USA (29)  | AUS (20) | AUS (13) | CAN (8)  | CHE (6) |
|  | CAN (30)  | CAN (20) | UK (13)  | AUT (9)  | ESP (6) |
|  | DEU (33)  | USA (21) | DEU (13) | UK (9)   | NLD (6) |
|  | JPN (34)  | DEU (24) | ESP (14) | AUS (9)  | AUS (6) |
|  | AUT (37)  | AUT (25) | USA (14) | ESP (9)  | UK (7)  |
|  | ITA (47)  | ESP (26) | AUT (15) | ITA (9)  | CAN (7) |
|  | ESP (47)  | ITA (28) | ITA (15) | USA (11) | PRT (7) |
|  | PRT (100) | PRT (55) | PRT (25) | PRT (13) | USA (9) |

AUS = Australia, AUT = Austria, CAN = Canada, CHE = Switzerland, DEU = West Germany, DNK = Denmark, ESP = Spain, FIN = Finland, FRA = France, ITA = Italy, JPN = Japan, NLD = Netherlands, NOR = Norway, PRT = Portugal, SWE = Sweden, UK = United Kingdom, USA = United States.

Source: Human Mortality Database.

Note: 15q0 is defined as the probability of dying from birth through age 14 at then prevailing age-specific mortality rates.

**Table A.5.** Evolution of male 35q15 for the US, and sixteen other high-income countries, 1958-67 to 1998-2007 (per 1,000)

| 1958-67   | 1968-77   | 1978-87  | 1988-97  | 1998-07  |
|-----------|-----------|----------|----------|----------|
| NLD (59)  | NLD (60)  | NLD (50) | JPN (44) | SWE (36) |
| SWE (62)  | SWE (66)  | JPN (55) | NLD (44) | NLD (37) |
| DNK (63)  | NOR (66)  | UK (57)  | SWE (47) | JPN (40) |
| NOR (66)  | UK (67)   | SWE (59) | UK (51)  | CHE (41) |
| UK (71)   | DNK (68)  | NOR (61) | NOR (53) | ITA (41) |
| CHE (78)  | CHE (69)  | ITA (61) | AUS (55) | CAN (44) |
| ESP (79)  | ESP (67)  | CHE (62) | CAN (56) | NOR (45) |
| ITA (79)  | JPN (73)  | ESP (64) | ITA (56) | AUS (46) |
| CAN (84)  | ITA (75)  | AUS (66) | CHE (60) | DEU (46) |
| DEU (85)  | CAN (84)  | CAN (66) | DEU (60) | UK (47)  |
| AUS (87)  | AUS (84)  | DNK (69) | DNK (64) | AUT (50) |
| AUT (94)  | DEU (87)  | DEU (73) | AUT (69) | DNK (52) |
| JPN (95)  | AUT (97)  | FIN (85) | ESP (72) | ESP (53) |
| FRA (97)  | FRA (97)  | USA (87) | FRA (79) | FRA (62) |
| USA (105) | PRT (104) | FRA (87) | FIN (81) | FIN (64) |
| PRT (106) | USA (106) | AUT (87) | USA (85) | USA (71) |
| FIN (115) | FIN (113) | PRT (93) | PRT (90) | PRT (76) |

AUS = Australia, AUT = Austria, CAN = Canada, CHE = Switzerland, DEU = West Germany, DNK = Denmark, ESP = Spain, FIN = Finland, FRA = France, ITA = Italy, JPN = Japan, NLD = Netherlands, NOR = Norway, PRT = Portugal, SWE = Sweden, UK = United Kingdom, USA = United States.

Source: Human Mortality Database.

Note: 35q15 is defined as the probability of dying from age 15 through age 49 at then prevailing age-specific mortality rates.

**Table A.6.** Evolution of female 35q15 for the US, and sixteen other high-income countries, 1958-67 to 1998-2007 (per 1,000)

|  | 1958-67  | 1968-77  | 1978-87  | 1988-97  | 1998-07  |
|--|----------|----------|----------|----------|----------|
|  | NOR (34) | NOR (31) | NOR (28) | JPN (23) | ITA (20) |
|  | NLD (37) | CHE (35) | JPN (28) | ITA (25) | JPN (20) |
|  | SWE (39) | NLD (36) | ESP (29) | SWE (26) | SWE (20) |
|  | CHE (41) | SWE (36) | ITA (29) | NOR (27) | CHE (21) |
|  | DNK (45) | ITA (39) | NLD (30) | AUS (27) | ESP (22) |
|  | CAN (46) | ESP (39) | SWE (30) | ESP (27) | AUS (23) |
|  | UK (46)  | FIN (40) | FIN (31) | CAN (28) | AUT (24) |
|  | ITA (48) | JPN (42) | CHE (31) | CHE (28) | NOR (24) |
|  | FIN (50) | UK (42)  | AUS (33) | NLD (28) | DEU (24) |
|  | DEU (51) | CAN (43) | CAN (34) | UK (29)  | CAN (24) |
|  | AUT (51) | DNK (44) | UK (34)  | FIN (30) | NLD (26) |
|  | AUS (51) | AUT (45) | DEU (36) | DEU (31) | UK (26)  |
|  | ESP (51) | FRA (46) | FRA (37) | AUT (31) | FIN (26) |
|  | FRA (51) | AUS (46) | AUT (38) | FRA (32) | FRA (27) |
|  | PRT (59) | DEU (46) | PRT (41) | PRT (36) | DNK (28) |
|  | USA (59) | PRT (50) | DNK (41) | DNK (37) | PRT (29) |
|  | JPN (65) | USA (55) | USA (42) | USA (39) | USA (37) |

AUS = Australia, AUT = Austria, CAN = Canada, CHE = Switzerland, DEU = West Germany, DNK = Denmark, ESP = Spain, FIN = Finland, FRA = France, ITA = Italy, JPN = Japan, NLD = Netherlands, NOR = Norway, PRT = Portugal, SWE = Sweden, UK = United Kingdom, USA = United States.

Source: Human Mortality Database.

Note: 35q15 is defined as the probability of dying from age 15 through age 49 at then prevailing age-specific mortality rates.



**Improving life expectancy: how many years behind has the US fallen? A cross-national comparison among high-income countries, 1958-2007**

|                                 |                                                                                                                                                         |
|---------------------------------|---------------------------------------------------------------------------------------------------------------------------------------------------------|
| Journal:                        | <i>BMJ Open</i>                                                                                                                                         |
| Manuscript ID:                  | bmjopen-2013-002814.R1                                                                                                                                  |
| Article Type:                   | Research                                                                                                                                                |
| Date Submitted by the Author:   | 08-May-2013                                                                                                                                             |
| Complete List of Authors:       | Verguet, Stephane; University of Washington, Global Health<br>Jamison, Dean; University of Washington, Global Health                                    |
| <b>Primary Subject Heading</b>: | Public health                                                                                                                                           |
| Secondary Subject Heading:      | Public health, Health services research                                                                                                                 |
| Keywords:                       | PUBLIC HEALTH, International health services < HEALTH SERVICES ADMINISTRATION & MANAGEMENT, Health policy < HEALTH SERVICES ADMINISTRATION & MANAGEMENT |
|                                 |                                                                                                                                                         |

SCHOLARONE™  
Manuscripts

**Title**

Improving life expectancy: how many years behind has the US fallen? A cross-national comparison among high-income countries, 1958-2007

**Authors**

Stéphane Verguet, Dean T Jamison

**Affiliation**

Department of Global Health, University of Washington, Seattle, WA, USA

**Correspondence to**

Stéphane Verguet, Department of Global Health, University of Washington, 325, 9<sup>th</sup> Avenue, Box 359931, Seattle, WA, 98104. Ph: +1-206-221-2147. Fax: +1-206-744-3694. Email: verguet@uw.edu.

**Keywords**

Life expectancy; population health; high-income countries; US; years behind.

## Abstract

*Objective:* many studies have documented higher mortality levels in the United States compared to other high-income nations. We add to this discussion by quantifying how many years behind comparison countries the US has fallen and by identifying when US mortality rates began to diverge.

*Design:* We use full life tables, for males and females, for seventeen high-income countries including the US. We extract the life expectancy at birth and compute the mortality rates for each five-year age group from birth up to age 80. Using the metric of how many “years behind” a country has fallen, we compare US mortality levels with those in the other high-income countries (“comparators”).

*Results:* We report life expectancy for seventeen high-income countries, for the period 1958-2007. Up to the late 1970s, US men and especially women closely tracked comparators in life expectancy. In the late 1970s the US, most strikingly women, began to diverge from comparators so that the US female life expectancy in 2007 corresponded to that of the comparators’ average 10 years earlier. Mortality rates also began to diverge from the late 1970s, and the largest mortality gap was in the 15-49 age group, for both males and females, where the US had fallen about 40 years behind the comparators by 2007.

*Conclusions:* Some causes proposed for high relative US mortality today – racial differences, lack of universal health insurance, US exceptionalism – changed little while the mortality gap emerged and grew. This suggests that explanations for the growing gap lie elsewhere. Quantification of how many years behind the US has fallen can help provide clues about where to look for potential causes and remedies.

## Article summary

### *Article focus*

- Many studies have documented higher mortality levels in the US compared to other high-income nations of Europe and Australasia.
- This study quantifies how many years behind comparison countries the US has fallen and explores whether there was a particular time when US mortality rates began to diverge from comparators.

### *Key messages*

- Since the late 1970s, the US life expectancy, most strikingly women's, began to diverge from comparators so that the US female life expectancy in 2007 corresponded to that of the comparators' average 10 years earlier.
- Mortality rates also began to diverge from the late 1970s, and the largest mortality gap was in the 15-49 age group, for both males and females, where by 2007 the US had fallen about 40 years behind the comparators.
- Identification of when US mortality rates began to diverge from comparators provides clues about where to look for potential causes and remedies.

### *Strengths and limitations of this study*

- The strength of this study is that it uses full life tables, for males and females, for seventeen high-income countries for an extended time series. The detailed results allow for tracking the magnitude and timing of US divergence. This provides a specific criterion for assessing the explanatory power of causes proposed for poor performance, and narrows the range of potentially important determinants.



- 1  
2  
3  
4  
5  
6  
7  
8  
9  
10  
11  
12  
13  
14  
15  
16  
17  
18  
19  
20  
21  
22  
23  
24  
25  
26  
27  
28  
29  
30  
31  
32  
33  
34  
35  
36  
37  
38  
39  
40  
41  
42  
43  
44  
45  
46  
47  
48  
49  
50  
51  
52  
53  
54  
55  
56  
57  
58  
59  
60
- The main limitation of this study is that it does not propose comprehensive explanations for high relative US mortality today and why the mortality gap emerged and grew, as it is instead a tool for others making those assessments. Concern for the poor US performance on mortality prompted major investigations by the US National Academy of Sciences into its causes, and it is not our purpose to reiterate the conclusions of the US National Academies' assessments.
  - This paper adds to the National Academies' assessments by identifying rapid changes on the path to improvement in life expectancy and a particular point in time marking the US deterioration relative to its comparators.

## Introduction

Much has been said and debated about the differences in health outcomes among high-income countries. Using different measures of health, mortality and disability, many studies have documented that the population of the United States is less healthy than those of the high-income nations in Europe and Australasia. This finding of poorer US health outcomes relative to other nations plays a significant part in public debate over improving US health outcomes.<sup>1</sup> This paper adds to the previous discussion by quantifying how many years behind its comparators the US has fallen and by exploring whether there was a particular time when US mortality rates began to diverge from the others. Identification of such a time would provide clues about where to look for potential causes and remedies.

The metric used to assess performance must be able to capture variation across countries and over time. In this paper we apply a long-established approach to performance measurement that lends itself readily to graphic depiction: the assessment of how many “years behind” a country has fallen, relative to other countries.<sup>2,3</sup> We compare the life expectancy (and age-specific mortality rates) for men and women in the US with the best country life expectancy (“leader”) and figures from sixteen other high-income countries in the Organisation for Economic Co-operation and Development (OECD) (“comparators”), from 1958-2007, using data primarily from the Human Mortality Database.<sup>4</sup> This dynamic depiction also captures the magnitude of the effort needed to catch-up with other participants. Evolution over time of years behind enables sensitive identification of divergent and convergent trends, and the ability to flag rapid changes on the path to improvement in life expectancy. This capacity underpins an important purpose

1  
2  
3 of this paper, which is to identify whether there is a point in time marking the beginning  
4  
5 of US deterioration relative to its comparators.  
6  
7  
8

## 9 10 **Design**

### 11 12 13 *Data*

14  
15 We use full life tables encompassing the years 1850 through 2007,<sup>4</sup> for males and  
16  
17 females, for the following seventeen countries: Australia, Austria, Canada, Denmark,  
18  
19 Finland, France, Germany (West Germany), Italy, Japan, Netherlands, Norway, Portugal,  
20  
21 Spain, Sweden, Switzerland, the United Kingdom, and the United States. This set of  
22  
23 countries is a subset of high-income OECD countries chosen for best comparability to the  
24  
25 US. The selection criteria were of sufficient population size to ensure stability of  
26  
27 estimates, high development achieved for a long time period, data quality and  
28  
29 availability, and were described elsewhere.<sup>5</sup> We extract the life expectancy at birth for  
30  
31 males and females, and the mortality rates for each five-year age group from birth up to  
32  
33 age 80 (0-4, 5-9, 10-14,..., 70-74, 75-79), and additionally for the specific age ranges 0-  
34  
35 14 and 15-49.  
36  
37  
38  
39  
40  
41  
42  
43  
44  
45

### 46 *Approach*

47  
48 We report life expectancy at birth for males and females for all seventeen countries, for  
49  
50 the period 1958-2007.<sup>a</sup> In keeping with published methodology, for each year we identify  
51  
52 the highest recorded life expectancy i.e. the leader.<sup>1,6,7</sup> These point estimates define a  
53  
54  
55

---

56  
57 <sup>a</sup> The latest year available for the United States was 2007. The earliest available year for West Germany  
58 was 1956. We retained the years 1958 to 2007 in order to have five 10-year periods.  
59  
60

1  
2  
3 “maximum frontier.” We also estimate the average life expectancy recorded for the  
4  
5 sixteen countries (arithmetic average), besides the US, i.e. the comparators. Finally, we  
6  
7 compare the US life expectancy to both the leader and the comparators. We do this by  
8  
9 calculating how many years behind the leader the US and the comparators fall in a given  
10  
11 year. For instance, if in 2007 the US had a life expectancy which was closest to the life  
12  
13 expectancy of the leader in 1986, then the US is said to have been 21 years behind the  
14  
15 leader in 2007.  
16  
17

18  
19 In order to investigate to what extent the health gap varies across different age  
20  
21 groups, we analyze mortality rates for males and females for the age groups described  
22  
23 above, for the period 1958-2007. Similarly, we identify the country with the lowest  
24  
25 recorded mortality rates in a given year (leader), which defines a “minimum frontier,”  
26  
27 and we compute the comparators’ average observed mortality rates per age group. Note  
28  
29 that this leader is not necessarily the same as the leader in life expectancy. Finally, we  
30  
31 calculate how many years behind the US and the comparators are for each age group and  
32  
33 each year of the period 1958-2007.  
34  
35  
36  
37  
38  
39

## 40 41 **Results**

### 42 43 44 45 *Years behind for life expectancy*

46  
47 Figure 1.a shows, over the period 1958-2007, for male and female life expectancy, the  
48  
49 evolution of the leader, the US and the comparators. In any given year, the leader, the US  
50  
51 and the comparators had higher life expectancies for females than for males. The US life  
52  
53 expectancy for males was lower than the comparators’ life expectancy for males; the  
54  
55 differential of life expectancy between the US and the leader diminished from the late  
56  
57  
58  
59  
60

1  
2  
3 1950s to the late 1970s, and then stayed about the same after the late 1970s, while the  
4  
5 differential of life expectancy between the US and the comparators slightly increased  
6  
7 after the late 1970s. For females, the US life expectancy was about the same as the  
8  
9 comparators from the late 1950s to the late 1970s, and both converged slightly toward the  
10  
11 leader. Notably, after the late 1970s, the life expectancy for US females started to diverge  
12  
13 substantially from both the comparators and the leader; the US presented a rate of  
14  
15 increase of about 1 year per decade, far below the 2-3 years per decade of the leader.  
16  
17 Tables A.1 and A.2 in the Supplementary Appendix show, for males and females, the life  
18  
19 expectancy across countries for each decade from 1958.  
20  
21  
22  
23  
24  
25  
26

27 FIGURE 1 AROUND HERE  
28  
29  
30

31 The number of years behind the leader, for male and female life expectancy, for  
32  
33 the US and the comparators, is presented in figure 1.b. In addition, the number of years  
34  
35 behind the comparators for the US is also presented in figure A.1 (Supplementary  
36  
37 Appendix). Because the same quantity of years behind may correspond to different  
38  
39 absolute gaps in life expectancy depending on the trends in the comparator countries,  
40  
41 figure A.5 (Supplementary Appendix) also reports, for males and females, the gap in life  
42  
43 expectancy between the US and the comparators, and between the US and the leader.  
44  
45 Over the period 1958-2007, for male life expectancy, the US always fell behind the  
46  
47 comparators, up to 25 years behind the comparators (figure A.1), and fell between 15 and  
48  
49 35 years behind the leader. Up to about the late 1970s, both the US and the comparators  
50  
51 presented a similar trend in increasing years behind the leader. Then, over the course of  
52  
53 only a few years, the comparators narrowed the distance from 25 to 10 years behind,  
54  
55  
56  
57  
58  
59  
60

1  
2  
3 followed by a slightly decreasing trend until 2007 where it was about 5 years behind the  
4  
5 leader. In contrast, the US narrowed the distance with the leader abruptly in the late  
6  
7 1980s (slightly delayed relative to the comparators), and then remained at about the same  
8  
9 level of 20 years behind the leader through 2007 leading to substantial divergence from  
10  
11 the comparators (about 15 years behind the comparators in 2007).  
12  
13

14  
15 Over the period 1958-2007, the life expectancy for US females was up to 10 years  
16  
17 behind the comparators and between 10 and 20 years behind the leader, which was better  
18  
19 than US male life expectancy but hid a disturbing trend (figure 1.b). Up to about the late  
20  
21 1970s, US females and the comparators presented similar trajectories: starting around 10  
22  
23 years behind the leader, they trailed to around 20, but made a comeback to where they  
24  
25 were, again, about 10 years behind the leader. Then, the US substantially diverged from  
26  
27 the comparators, falling further and further behind at a steady pace (figure 1.b; figure  
28  
29 A.1). In 1998-07, the US was about 10 years behind the comparators and about 20 years  
30  
31 behind the leader, with a life expectancy of 79.9 years (Supplementary Appendix, table  
32  
33 A.2).  
34  
35  
36  
37  
38  
39  
40

#### 41 *Years behind in age-specific mortality rates*

42  
43 Figure 2 shows the number of years behind the leader the US and the comparators were  
44  
45 for five-year age groups, for males and females and two time periods, the early 1960s  
46  
47 (1958-67) and the early 2000s (1998-07). The number of years behind the comparators  
48  
49 the US was for five-year age groups is also presented in figure A.2 (Supplementary  
50  
51 Appendix). In the early 1960s, the US and the comparators presented similar age  
52  
53 distributions for the number of years behind the leader, for males and females. Males  
54  
55 presented a larger number of years behind than females across almost all age groups;  
56  
57  
58  
59  
60

1  
2  
3 females in both the US and the comparators presented almost identical age distributions  
4  
5 for years behind the leader. The situation in the early 2000s was very different for the US.  
6  
7 For females, the comparators presented a pattern similar to the early 1960s, between 10  
8  
9 and 20 years behind the leader across all age groups; the US presented a larger number of  
10  
11 years behind the leader but most significantly the number of years behind the leader had  
12  
13 increased substantially between age 15 and age 50 (about 30 years behind the  
14  
15 comparators; figure A.2). For males, the comparators had substantially reduced the  
16  
17 number of years behind the leader beyond age 45, but increased the number of years  
18  
19 behind the leader from age 15 to age 40; the US had also substantially reduced the  
20  
21 number of years behind the leader after age 45, and like the comparators, had increased  
22  
23 the number of years behind the leader between age 10 and age 45 (about 30 years behind  
24  
25 the comparators; figure A.2).  
26  
27  
28  
29  
30  
31  
32  
33

34 FIGURE 2 AROUND HERE  
35  
36  
37

38 Figure 3.a shows time trends in the probability of dying between age birth and age  
39  
40 15 (15q0) for the leader, the US and the comparators. Tables A.3 and A.4 in the  
41  
42 Supplementary Appendix show values for 15q0 across countries. In a given year, the  
43  
44 leader, the US and the comparators had higher mortality rates for males than for females.  
45  
46 For both males and females, from the early 1960s to the early 2000s, the differential of  
47  
48 15q0 between the US and the comparators stayed similar (slightly increasing), and the  
49  
50 differential of 15q0 between the US and the leader also stayed similar (slightly  
51  
52 decreasing). The US 15q0 started lower than the comparators' 15q0 for both males and  
53  
54 females; in the 1970s, the US and the comparators crossed. For both males and females,  
55  
56  
57  
58  
59  
60

1  
2  
3 the comparators' 15q0 was converging toward the leader throughout the entire time  
4  
5 period.  
6  
7  
8  
9

10  
11  
12  
13  
14  
15  
16  
17  
18  
19  
20  
21  
22  
23  
24  
25  
26  
27  
28  
29  
30  
31  
32  
33  
34  
35  
36  
37  
38  
39  
40  
41  
42  
43  
44  
45  
46  
47  
48  
49  
50  
51  
52  
53  
54  
55  
56  
57  
58  
59  
60

FIGURE 3 AROUND HERE

Figure 4.a shows time trends for the probability of dying between age 15 and age 50 (35q15) for the leader, the US and the comparators. Tables A.5 and A.6 in the Supplementary Appendix show values for 35q15 across countries. In a given year, the leader, the US and the comparators had substantially higher mortality rates for males than for females. For both males and females, the US 35q15 was always higher than the comparators' 35q15; the differential of 35q15 between the US and the comparators and between the US and the leader stayed about the same from 1958 to 2007, for males. However, for females, the US was slightly diverging from both the comparators and the leader from 1980 onward.

FIGURE 4 AROUND HERE

Figures 3.b and 4.b show the number of years behind the leader the US and the comparators were for the 0-14 and 15-49 age groups, for males and females, over the 1958-2007 period. The number of years behind the comparators the US was, for the mortality rates in the 0-14 and 15-49 age groups, is also presented in figures A.3 and A.4 (Supplementary Appendix). Figures A.6 and A.7 (Supplementary Appendix) also report, for males and females, the gap in 15q0 and 35q15 between the US and the comparators, and between the US and the leader. For the 0-14 age group, up to the late 1970s, the US



1  
2  
3 and the comparators showed somewhat similar trajectories, between 10 and 20 years  
4  
5 behind the leader (both males and females); on average, the US was slightly ahead of the  
6  
7 comparators then. Afterwards, while the comparators consistently kept pace about 10  
8  
9 years behind the leader, the US saw an increase up to 15 years behind the comparators  
10  
11 (figure A.3) and up to between 20 and 30 years behind the leader through 2007 (both  
12  
13 males and females). For the 15-49 age group, the US was always behind the comparators  
14  
15 over the whole period; the US consistently diverged from the leader. The male trajectory,  
16  
17 for the US and the comparators, was similar until the early 1990s, when the comparators  
18  
19 started converging on the leader, dropping from about 40 to 15 years behind the leader in  
20  
21 2007; meanwhile, the US kept diverging with years behind the comparators increasing  
22  
23 from about 10 years in 1990 to about 45 years in 2007 (figure A.4), a corresponding  
24  
25 increase in years behind the leader from about 45 years in 1990 to about 55 years. The  
26  
27 female trajectory, for the US and the comparators, was somewhat similar until the mid-  
28  
29 1970s (20-25 years behind the leader then), when the comparators kept the distance  
30  
31 behind the leader below 20 years (below 10 years behind the leader in 2007), while the  
32  
33 US continued diverging, being about 40 years behind the comparators and about 50 years  
34  
35 behind the leader in 2007.  
36  
37  
38  
39  
40  
41  
42  
43  
44

## 45 Discussion

46  
47 This paper applies a sensitive measure of national performance – years behind – to  
48  
49 comparison of US mortality rates with those of other high-income countries. As has been  
50  
51 well documented,<sup>1,8</sup> US life expectancy is lower and mortality rates are higher than in  
52  
53 other high-income or comparator countries. Life expectancy results summarize and  
54  
55 aggregate an heterogeneous combination of distinct age-specific mortality measures and  
56  
57  
58  
59  
60

1  
2  
3 patterns, hence we further examined mortality rates across different age groups. Most  
4  
5 strikingly, for both males and females, the typical high-income country had achieved, by  
6  
7 the 1970s, a mortality rate in the age group 15-49 that the US failed to achieve until about  
8  
9 2007: i.e., the US, in 2007 fell about 40 years behind the average (and 50 years behind  
10  
11 the leader). A similar if less pronounced pattern appears for life expectancy and for  
12  
13 mortality under age 15. The US now lies far behind other high-income countries, but this  
14  
15 was not always so. The detailed results of this paper allow for tracking the magnitude of  
16  
17 US divergence and for (approximate) timing of when it began. Although our results  
18  
19 contain noise a key result emerges: sometime in the late 1970s the US stopped tracking  
20  
21 its comparators and began to fall behind (table 1). At different rates for different  
22  
23 indicators the US fell further and further behind over subsequent three decades. The  
24  
25 finding is remarkably striking for US females.  
26  
27  
28  
29  
30  
31  
32  
33

34 TABLE 1 AROUND HERE  
35  
36  
37

38 The analysis presents several strengths. It uses full life tables, for males and  
39  
40 females, for seventeen high-income countries for an extended time series, and it allows  
41  
42 for tracking the timing of US divergence. This provides a specific criterion for assessing  
43  
44 the explanatory power of causes proposed for poor performance, and narrows the range  
45  
46 of potentially important determinants. In particular, trends in mortality rates provide a  
47  
48 starting point for assessing the importance of the determinants of health.<sup>9,10</sup> The analysis  
49  
50 also has limitations. For instance, it does not aim at fully explaining in detail why the US  
51  
52 mortality gap emerged and grew, as it essentially proposes a tool for others making those  
53  
54 assessments. In addition, while the results highlight a particular period in time when the  
55  
56  
57  
58  
59  
60

1  
2  
3 US fell behind other countries, one should be cautious in interpretation as there may be a  
4  
5 lag time between any determinant change and its population-level effect on mortality.  
6  
7 The timing of effects is delicate as different policies may have different temporal spans  
8  
9 (e.g. tobacco control). It may take a long time to reduce mortality gaps, if appropriate  
10  
11 interventions are not implemented rapidly. Some diseases may be amenable to both  
12  
13 immediate curative and preventive interventions (e.g. reduction of blood pressure)  
14  
15 whereas certain habits/conditions independent of the current state of things, such as  
16  
17 tobacco consumption<sup>11</sup> and obesity,<sup>12,13</sup> can affect mortality many decades later. Finally,  
18  
19 the years behind results may be more stable when the comparator is the average of all the  
20  
21 other countries rather than the leading country as there may be rapid changes in the  
22  
23 leading country (tables A.1-4, Supplementary Appendix). Hence, we also presented  
24  
25 results for years behind the comparators (figures A.1-4; Supplementary Appendix).  
26  
27  
28  
29  
30

31 Concern for the poor US performance on mortality prompted major investigations  
32  
33 by the US National Academy of Sciences<sup>1,8</sup> into its nature (in terms of age groups and  
34  
35 conditions) and its causes. Major potential causes that have been explored include cross-  
36  
37 country differences in the level and equality of income, in level of education, in social  
38  
39 cohesion, in a broad range of specific risk factors, and in the level and quality of  
40  
41 expenditures on the health care system. The National Research Council (NRC) examined  
42  
43 the diverging trends in mortality between the US and others with high income, looking at  
44  
45 specific causes of deaths. NRC researchers estimated that a large part of the life  
46  
47 expectancy difference was attributable to smoking, amounting to 80 and 40% of the  
48  
49 difference for females and males, respectively.<sup>11</sup> Less dramatically, they suggested that  
50  
51 20 to 33% of the life expectancy gap could be attributable to higher rates of obesity.<sup>12</sup>  
52  
53  
54  
55 They argued that smoking and obesity could well explain the rise of mortality recorded in  
56  
57  
58  
59  
60

1  
2  
3 adult men and women over the last decades.<sup>14</sup> Other research has shown that chronically  
4  
5 ill US patients tend to have less access to care, and benefit from less efficient and  
6  
7 organized care, compared to counterparts in other high-income countries.<sup>15</sup> Beyond  
8  
9 substantial healthcare spending, social welfare spending is a strong determinant for  
10  
11 population health.<sup>16</sup> Overemphasizing individual risk factors can obscure the importance  
12  
13 of key determinants of health such as financing and delivery.<sup>17</sup> Constructively, these  
14  
15 determinants offer the possibility that political commitment inside and outside the health  
16  
17 sector can make real improvements in population health.<sup>16,17</sup> Finally, the “compression”  
18  
19 of older age mortality from 1958-67 to 1998-07 in the US may be attributable to the  
20  
21 Medicare program introduced in 1965.  
22  
23  
24  
25

26  
27 It is not our purpose to reiterate the conclusions of the National Academies’  
28  
29 assessments. Rather our conclusions point to an additional and quite specific criterion for  
30  
31 judging the explanatory power of potential explanations for poor performance in the US.  
32  
33 Since we conclude divergence to have begun in the late 1970s, potential explanations like  
34  
35 racial diversity, lack of health insurance and high income inequality in the US become  
36  
37 less plausible. Racial diversity and income inequality were high, and insurance coverage  
38  
39 low in the US in the 1970s when the US was performing well on health. Establishing a  
40  
41 time for the beginning of the US divergence helps in identifying the effects of the broader  
42  
43 social policy arena on health,<sup>18</sup> and in narrowing the range of potentially important  
44  
45 determinants, and remedies.  
46  
47  
48  
49

50  
51 Seeking potential explanations, we examined whether the more advantaged  
52  
53 population groups presented similar trends to the average of comparator countries while  
54  
55 looking at the maximum and minimum life expectancy (by county) and the average white  
56  
57 and black life expectancy (by county) in the US<sup>19</sup> (figure A.8, Supplementary Appendix).  
58  
59  
60

1  
2  
3 We found however that maximum male/female and white male/female life expectancy  
4 followed a somewhat distinct trajectory in recent decades. Likewise, the divergence from  
5 the 1970s could be related to a lack of universal coverage with unequal treatment access  
6 and coverage at a time when many treatments for cardiovascular disease (CVD) (e.g.  
7 anti-hypertensives, statins) became available. Using OECD data,<sup>20</sup> we examined whether  
8 this divergence was following declines in CVD mortality. We found on the contrary that  
9 US CVD mortality reduced more rapidly in the late 1970s compared to comparator  
10 countries (figure A.9, Supplementary Appendix). Recent research<sup>21</sup> showed that from  
11 1983 to 1999, life expectancy declined significantly in 11 US counties for men and in 180  
12 counties for women. These declines were caused by increased mortality from lung  
13 cancer, chronic obstructive pulmonary disease, diabetes, and were no longer compensated  
14 for by the CVD mortality decline.<sup>21</sup>

15  
16  
17 Measuring health system performance will remain difficult: health outcomes  
18 depend on the health system together with non-medical socio-economic and geographical  
19 determinants, and can be affected by favorable risk factors. Assessing performance in  
20 health in terms of “years behind” enables identifying trends and rapid changes in  
21 outcomes, for which researchers can then try to identify explanations. The years behind  
22 measure offers an intuitive and generalizable approach to measuring country performance  
23 in health, as well as convergent and divergent patterns, and can be readapted to various  
24 health indicators, for diverse disease- and condition-related outcomes. We suggest that  
25 this approach would also be valuable for the evaluation of US performance on specific  
26 causes of death and conditions, facilitating the design of policies that impact health and  
27 social risk factors for the most burdened populations.

## Acknowledgements

The authors received valuable comments from Laudy Aron. We thank Anna Peeters and Goodarz Danaei for their constructive and valuable contributions on our work.

## Contributors

SV and DTJ designed the study, conducted the analysis, interpreted the data and drafted the original manuscript.

## Funding

This work was supported by the Bill & Melinda Gates Foundation through the Disease Control Priorities Network grant to the University of Washington, and by the National Research Council of the United States National Academies.

## Competing interests

None declared

## Data sharing statement

There is no additional data available.

## References

1. Crimmins EM, Preston SH, Cohen B, editors. *Explaining divergent levels of longevity in high-income countries*. Washington, DC: National Academies Press, 2011.
2. Sicherl P. Time-distance as a dynamic measure of disparities in social and economic development. *Kyklos* 1973; 26(3):559-575.
3. Kulkarni SC, Levin-Rector A, Ezzati M, et al. Falling behind: life expectancy in US counties from 2000 to 2007 in an international context. *Population Health Metrics* 2011; 9(1):16.
4. Human Mortality database. <http://www.mortality.org/> (accessed 30 Aug 2011).
5. Ho JH, Preston SH. US mortality in an international context: age variations. *Population and Development Review* 2010; 36(4):749-773.
6. Oeppen J, Vaupel JW. Broken limits to life expectancy. *Science* 2002; 296:1029-31.
7. Vallin J, Meslé F. The segmented trend line of highest life expectancies, *Population and Development Review* 2009; 35(1):159-187.
8. Woolf S, Aron L, editors. *US health in international perspectives: shorter lives, poorer health*. Washington, DC: National Academies Press, 2013.
9. Verguet S, Jamison DT. Performance in rate of decline of adult mortality in the OECD, 1970-2010. *Health Policy* 2013; 109(2):137-42.
10. Verguet S, Jamison DT. Estimates of performance in the rate of decline of under-five mortality for 113 low- and middle-income countries, 1970-2010. *Health Policy and Planning* 2013; doi:10.1093/heapol/czs143.
11. Preston SH, Gleij DA, Wilmoth JR. Contribution of smoking to international differences in life expectancy. In: Crimmins EM, Preston SH, Cohen B (eds). *International Differences in Mortality at Older Ages: Dimensions and Sources*. Washington, DC: The National Academies Press, 2010.
12. Alley DE, Lloyd J, Shardell M. Can obesity account for cross-national differences in life-expectancy trends? In: Crimmins EM, Preston SH, Cohen B (eds).

- 1  
2  
3 International Differences in Mortality at Older Ages: Dimensions and Sources.  
4 Washington, DC: The National Academies Press, 2010.  
5  
6  
7 13. Comanor WS, Frech HE III, Miller RD Jr. Is the United States an outlier in health  
8 care and health outcomes? *International Journal of Health Care Finance and*  
9 *Economics* 2006; 6:3-23.  
10  
11  
12 14. Preston S, Ho J. Low life expectancy in the United States: is the health care  
13 system at fault? In: Crimmins EM, Preston SH, Cohen B (eds). *International*  
14 *Differences in Mortality at Older Ages: Dimensions and Sources*. Washington,  
15 DC: The National Academies Press, 2010.  
16  
17  
18 15. Schoen C, Osborn R, How SKH, et al. In chronic condition: experiences of  
19 patients with complex health care needs, in eight countries, 2008. *Health Affairs*  
20 2009; 28(1):w1-w16.  
21  
22  
23 16. Stuckler D, Basu S, McKee M. Budget crises, health, and social welfare  
24 programmes. *British Medical Journal* 2010; 340: doi.10.1136/bmj.c3311.  
25  
26  
27 17. Geneau R, Stuckler D, Stachenko S, et al. Raising the priority of preventing  
28 chronic diseases: a political process. *Lancet* 2010; 376:1689-1698.  
29  
30  
31 18. Dow WH, Rehkopf DH. Socioeconomic gradients in health in international and  
32 historical context. *Annals of the New York Academy of Sciences* 2010; 1186:24-  
33 36.  
34  
35  
36 19. Institute for Health Metrics and Evaluation. Life expectancy in US counties 1989-  
37 2009. [http://www.healthmetricsandevaluation.org/news-events/event/ihme-](http://www.healthmetricsandevaluation.org/news-events/event/ihme-release-county-life-expectancy-results-14th-annual-health-journalism-conferen#/data-methods)  
38 [release-county-life-expectancy-results-14th-annual-health-journalism-](http://www.healthmetricsandevaluation.org/news-events/event/ihme-release-county-life-expectancy-results-14th-annual-health-journalism-conferen#/data-methods)  
39 [conferen#/data-methods](http://www.healthmetricsandevaluation.org/news-events/event/ihme-release-county-life-expectancy-results-14th-annual-health-journalism-conferen#/data-methods) (accessed 30 Apr 2013).  
40  
41  
42 20. Organisation for Economic Co-operation and Development. OECD.StatExtracts.  
43 <http://stats.oecd.org/> (accessed 30 Apr 2013).  
44  
45  
46 21. Ezzati M, Friedman AB, Kulkarni SC, et al. The reversal of fortunes: trends in  
47 county mortality and cross-county mortality disparities in the United States. *PloS*  
48 *Medicine* 2008; 5(4):e66.  
49  
50  
51  
52  
53  
54  
55  
56  
57  
58  
59  
60



**Figure 1.** Evolution of life expectancy and years behind the leader for the leader, the US, and the average of sixteen comparator high-income countries, males and females, 1958-2007

(a) Life expectancy



(b) Years behind the leader

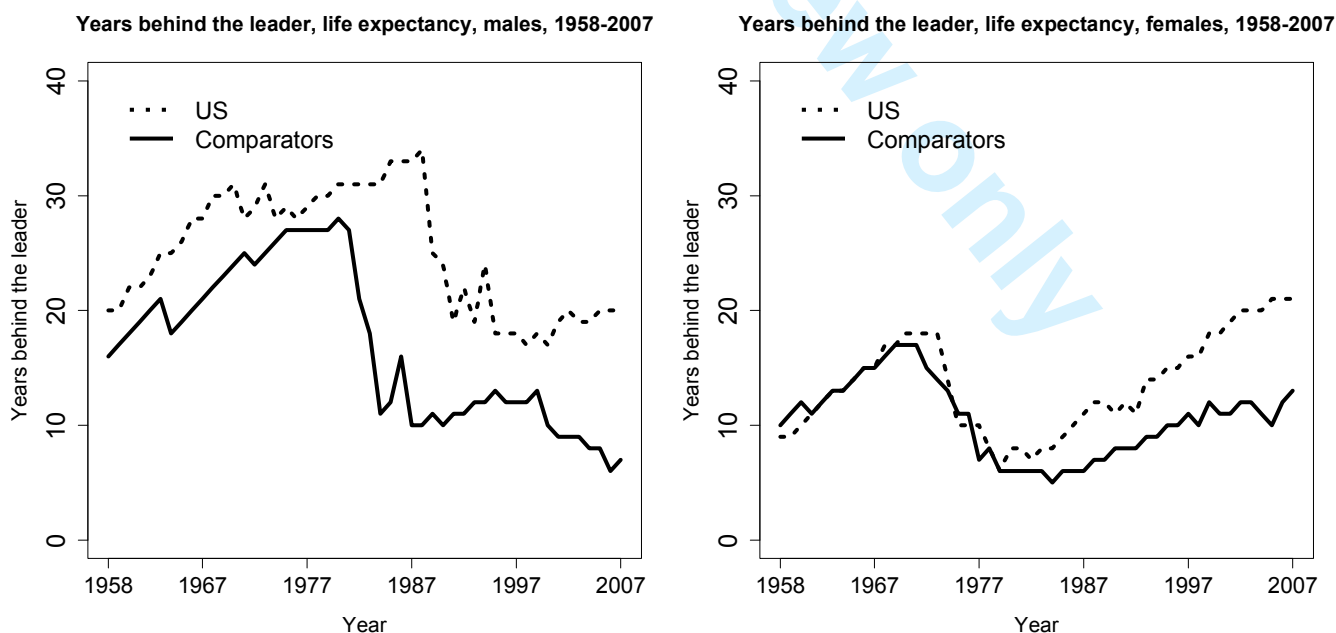

**Figure 2.** Number of years behind the leader for mortality rates across age groups, for the US and the average of sixteen comparator high-income countries, males and females, early 1960s and early 2000s

(a) Males

Years behind the leader, mortality rates, males, early 1960s

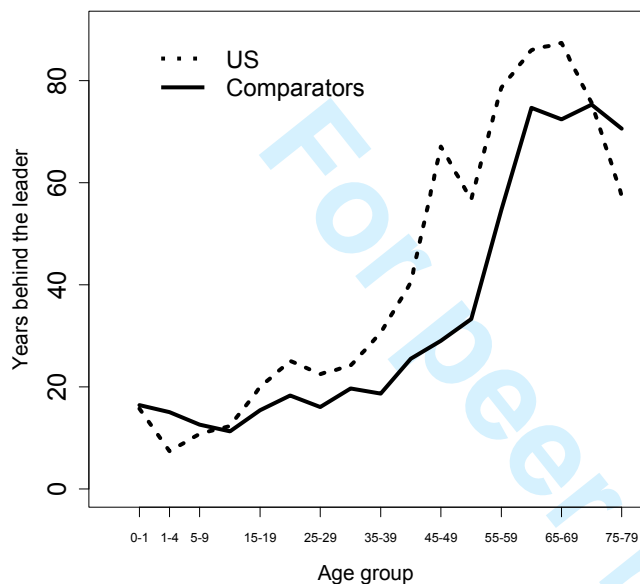

Years behind the leader, mortality rates, males, early 2000s

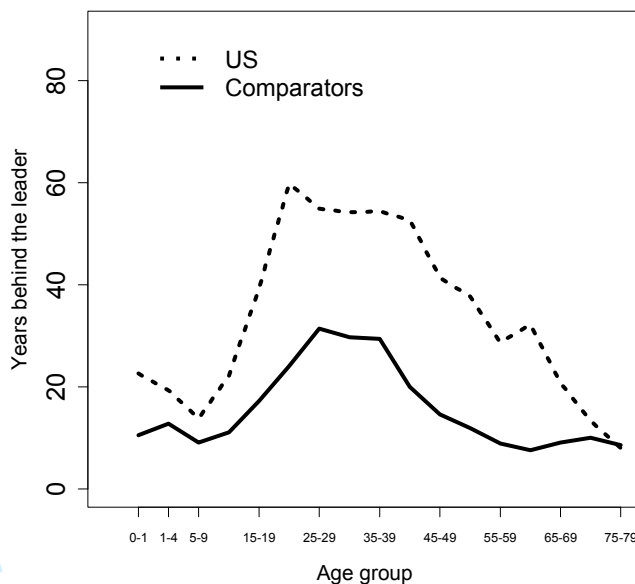

(b) Females

Years behind the leader, mortality rates, females, early 1960s

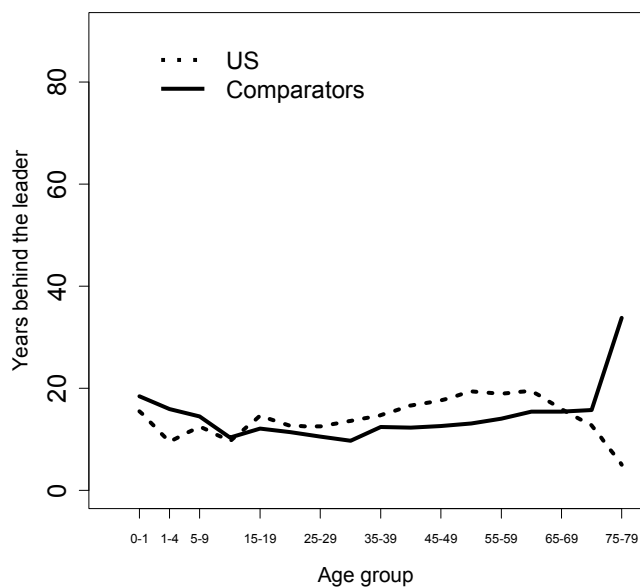

Years behind the leader, mortality rates, females, early 2000s

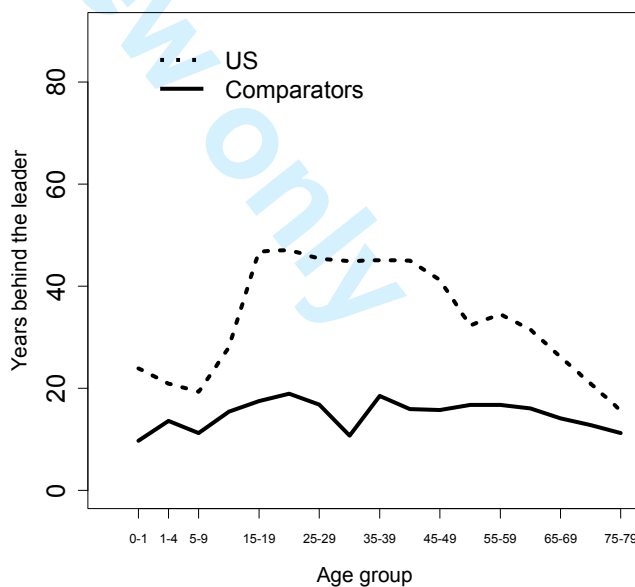

Note: Early 1960s refers to the period 1958-67 and early 2000s refers to 1998-2007.

**Figure 3.** Evolution of mortality rates and years behind the leader in the 0-14 age group, for the leader, the US, and the average of sixteen comparator high-income countries, males and females, 1958-2007

(a) Mortality rates

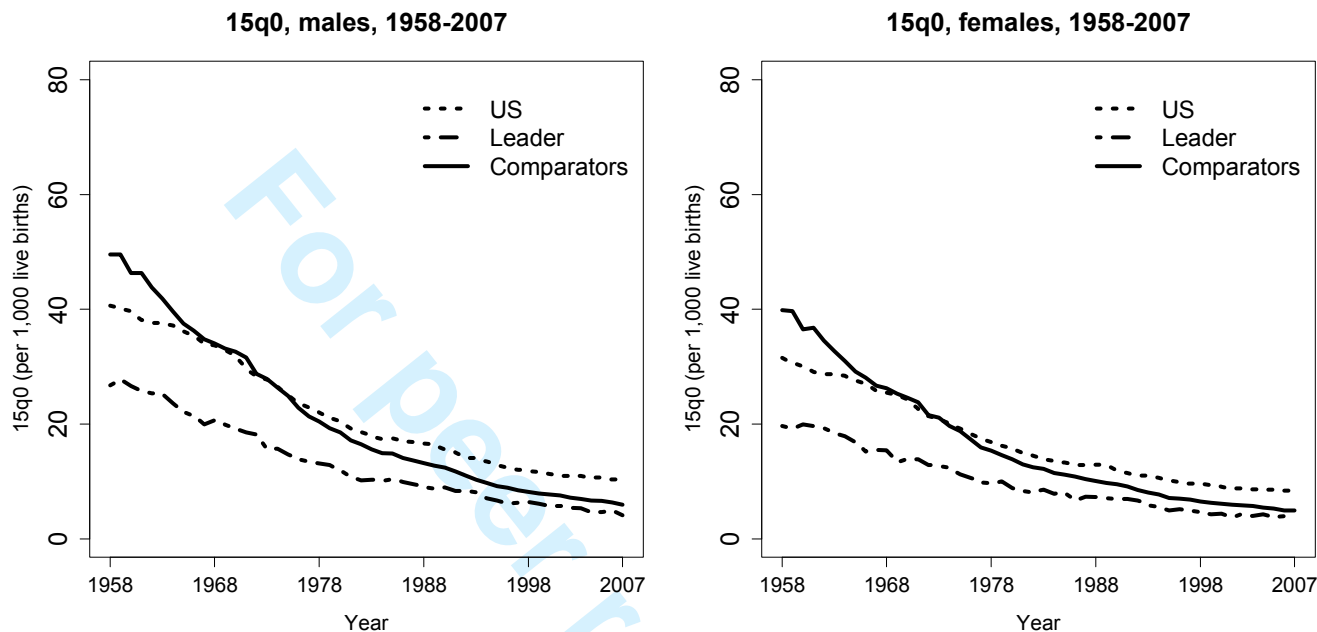

(b) Years behind the leader

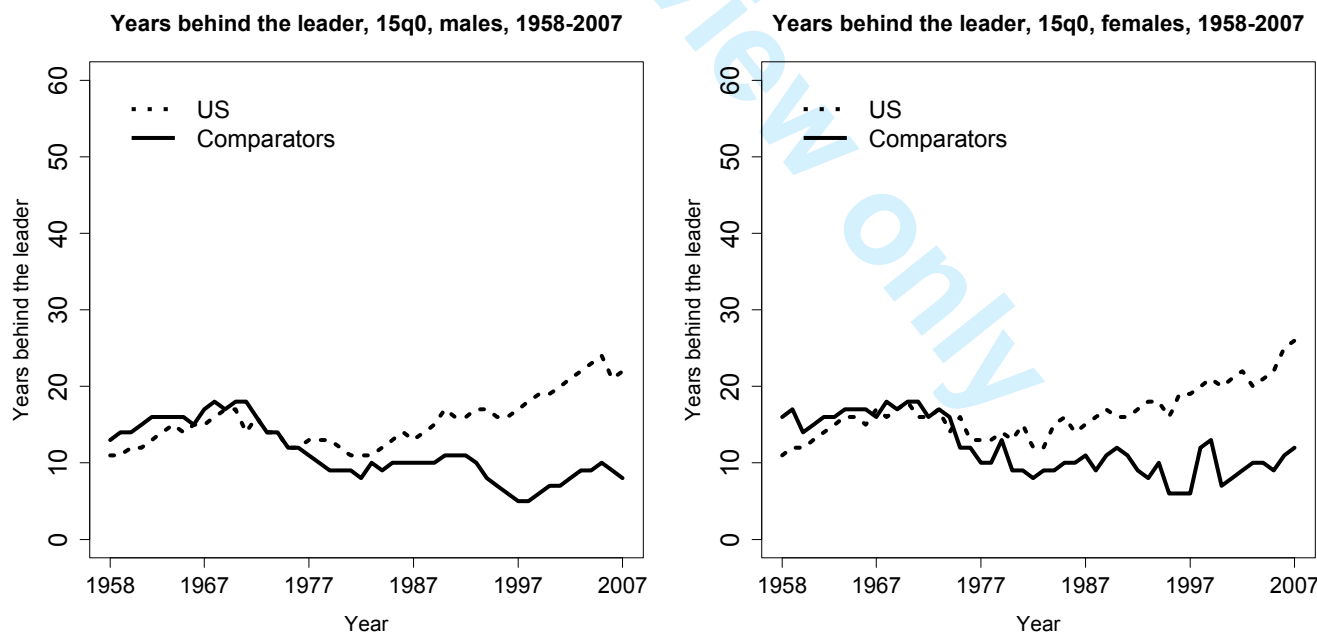

Note: 15q0 is defined as the probability of dying from birth through age 14 at then prevailing age-specific mortality rates.

**Figure 4.** Evolution of mortality rates and years behind the leader in the 15-49 age group, for the leader, the US, and the average of sixteen comparator high-income countries, males and females, 1958-2007

(a) Mortality rates

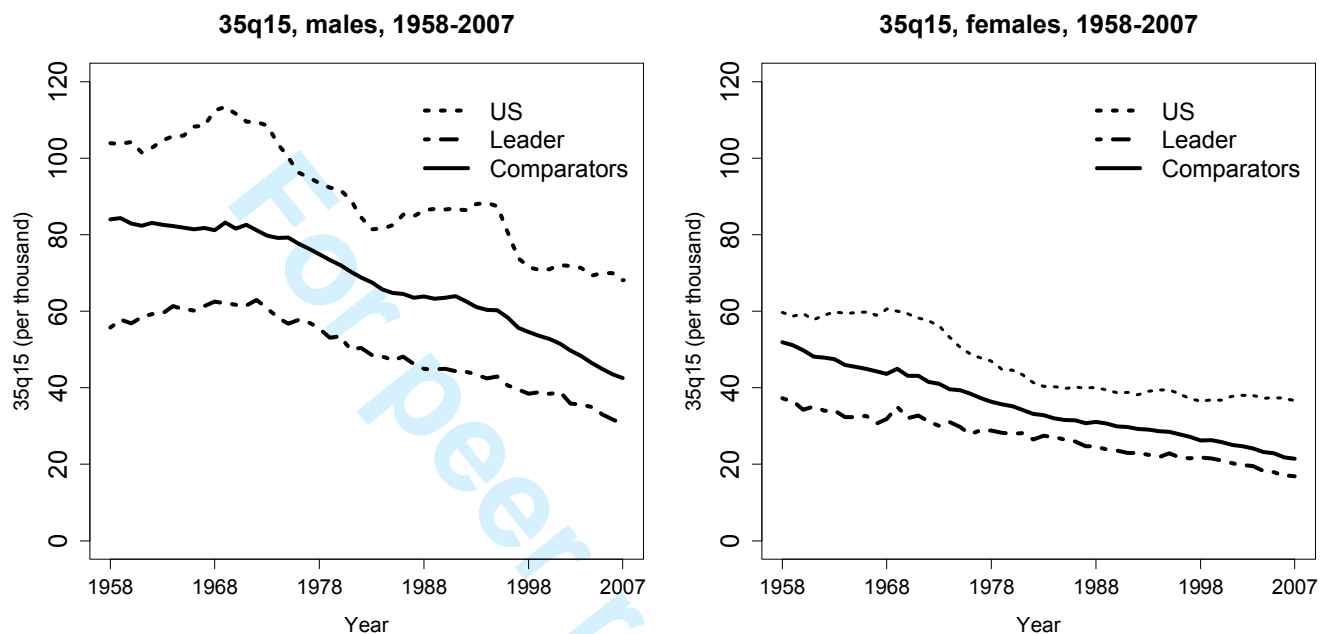

(b) Years behind the leader

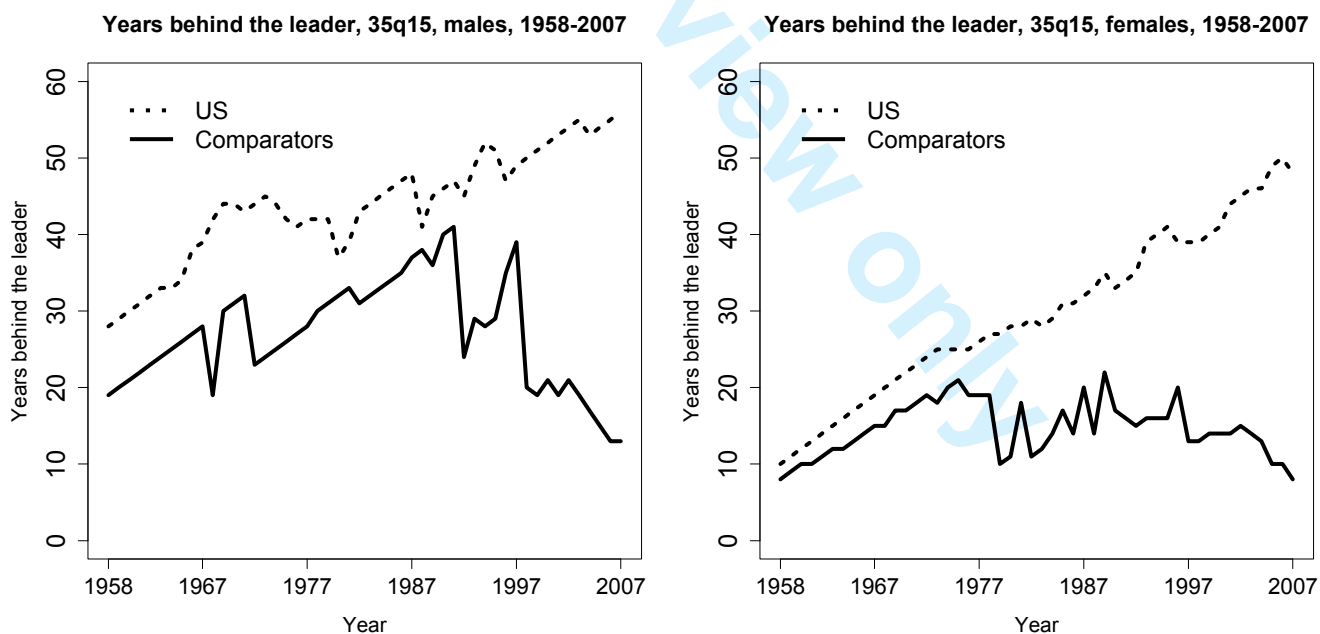

Note: 35q15 is defined as the probability of dying from age 15 through age 49 at then prevailing age-specific mortality rates.

**Table 1.** Timing of US divergence from the average of sixteen comparator high-income countries, for life expectancy, 15q0, and 35q15, males and females, 1958-2007

| Indicator       | Males                                                                         | Females                                                             |
|-----------------|-------------------------------------------------------------------------------|---------------------------------------------------------------------|
| Life expectancy | Late 1970s<br>(temporary reconvergence late '80s to late '90s)                | Late 1970s                                                          |
| 15q0            | Late 1970s<br>(US had lower mortality than comparators before 1965)           | Late 1970s<br>(US had lower mortality than comparators before 1965) |
| 35q15           | About 1990<br>(US already substantially behind comparators before divergence) | Late 1970s<br>(more rapid divergence after about 1990)              |

Note: 15q0 is defined as the probability of dying from birth through age 14 at then prevailing age-specific mortality rates; 35q15 is defined as the probability of dying from age 15 through age 49 at then prevailing age-specific mortality rates.

**Title**

Improving life expectancy: how many years behind has the US fallen? [A cross-national comparison among high-income countries, 1958-2007](#)

**Authors**

Stéphane Verguet, Dean T Jamison

**Affiliation**

Department of Global Health, University of Washington, Seattle, WA, USA

**Correspondence to**

Stéphane Verguet, Department of Global Health, University of Washington, 325, 9<sup>th</sup> Avenue, Box 359931, Seattle, WA, 98104. Ph: +1-206-[221-2147](#). Fax: +1-206-744-3694. Email: [verguet@uw.edu](mailto:verguet@uw.edu).

**Keywords**

Life expectancy; population health; high-income countries; US; years behind.

## Abstract

*Objective:* many studies have documented higher mortality levels in the United States compared to other high-income nations. We add to this discussion by quantifying how many years behind comparison countries the US has fallen and by identifying when US mortality rates began to diverge.

*Design:* We use full life tables, for males and females, for seventeen high-income countries including the US. We extract the life expectancy at birth and compute the mortality rates for each five-year age group from birth up to age 80. Using the metric of how many “years behind” a country has fallen, we compare US mortality levels with those in the other high-income countries (“comparators”).

*Results:* We report life expectancy for seventeen high-income countries, for the period 1958-2007. Up to the late 1970s, US men and especially women closely tracked comparators in life expectancy. In the late 1970s the US, most strikingly women, began to diverge from comparators so that the US female life expectancy in 2007 corresponded to that of the comparators’ average 10 years earlier. Mortality rates also began to diverge from the late 1970s, and the largest mortality gap was in the 15-49 age group, for both males and females, where the US had fallen about 40 years behind the comparators by 2007.

*Conclusions:* Some causes proposed for high relative US mortality today – racial differences, lack of universal health insurance, US exceptionalism – changed little while the mortality gap emerged and grew. This suggests that explanations for the growing gap lie elsewhere. Quantification of how many years behind the US has fallen can help provide clues about where to look for potential causes and remedies.

## Article summary

### *Article focus*

- Many studies have documented higher mortality levels in the US compared to other high-income nations of Europe and Australasia.
- This study quantifies how many years behind comparison countries the US has fallen and explores whether there was a particular time when US mortality rates began to diverge from comparators.

### *Key messages*

- Since the late 1970s, the US life expectancy, most strikingly women's, began to diverge from comparators so that the US female life expectancy in 2007 corresponded to that of the comparators' average 10 years earlier.
- Mortality rates also began to diverge from the late 1970s, and the largest mortality gap was in the 15-49 age group, for both males and females, where by 2007 the US had fallen about 40 years behind the comparators.
- Identification of when US mortality rates began to diverge from comparators provides clues about where to look for potential causes and remedies.

### *Strengths and limitations of this study*

- The strength of this study is that it uses full life tables, for males and females, for seventeen high-income countries for an extended time series. The detailed results allow for tracking the magnitude and timing of US divergence. This provides a specific criterion for assessing the explanatory power of causes proposed for poor performance, and narrows the range of potentially important determinants.



- 1  
2  
3  
4  
5  
6  
7  
8  
9  
10  
11  
12  
13  
14  
15  
16  
17  
18  
19  
20  
21  
22  
23  
24  
25  
26  
27  
28  
29  
30  
31  
32  
33  
34  
35  
36  
37  
38  
39  
40  
41  
42  
43  
44  
45  
46  
47  
48  
49  
50  
51  
52  
53  
54  
55  
56  
57  
58  
59  
60
- The main limitation of this study is that it does not propose **comprehensive** explanations for high relative US mortality today and why the mortality gap emerged and grew, as it is instead a tool for others making those assessments. Concern for the poor US performance on mortality prompted major investigations by the US National Academy of Sciences into its causes, and it **is** not our purpose to reiterate the conclusions of the US National Academies' assessments.
  - This paper adds to the National Academies' assessments by identifying rapid changes on the path to improvement in life expectancy and a particular point in time marking the US deterioration relative to its comparators.

## Introduction

Much has been said and debated about the differences in health outcomes among high-income countries. Using different measures of health, mortality and disability, many studies have documented that the population of the United States is less healthy than those of the high-income nations in Europe and Australasia. This finding of poorer US health outcomes relative to other nations plays a significant part in public debate over improving US health outcomes.<sup>1</sup> This paper adds to the previous discussion by quantifying how many years behind its comparators the US has fallen and by exploring whether there was a particular time when US mortality rates began to diverge from the others. Identification of such a time would provide clues about where to look for potential causes and remedies.

The metric used to assess performance must be able to capture variation across countries and over time. In this paper we apply a long-established approach to performance measurement that lends itself readily to graphic depiction: the assessment of how many “years behind” a country has fallen, relative to other countries.<sup>2,3</sup> We compare the life expectancy (and age-specific mortality rates) for men and women in the US with the best country life expectancy (“leader”) and figures from sixteen other high-income countries in the Organisation for Economic Co-operation and Development (OECD) (“comparators”), from 1958-2007, using data primarily from the Human Mortality Database.<sup>4</sup> This dynamic depiction also captures the magnitude of the effort needed to catch-up with other participants. Evolution over time of years behind enables sensitive identification of divergent and convergent trends, and the ability to flag rapid changes on the path to improvement in life expectancy. This capacity underpins an important purpose

1  
2  
3 of this paper, which is to identify whether there is a point in time marking the beginning  
4  
5 of US deterioration relative to its comparators.  
6  
7  
8

## 9 10 **Design**

### 11 12 13 *Data*

14  
15 We use full life tables encompassing the years 1850 through 2007,<sup>4</sup> for males and  
16  
17 females, for the following seventeen countries: Australia, Austria, Canada, Denmark,  
18  
19 Finland, France, Germany (West Germany), Italy, Japan, Netherlands, Norway, Portugal,  
20  
21 Spain, Sweden, Switzerland, the United Kingdom, and the United States. This set of  
22  
23 countries is a subset of high-income OECD countries chosen for best comparability to the  
24  
25 US. The selection criteria were of sufficient population size to ensure stability of  
26  
27 estimates, high development achieved for a long time period, data quality and  
28  
29 availability, and were described elsewhere.<sup>5</sup> We extract the life expectancy at birth for  
30  
31 males and females, and the mortality rates for each five-year age group from birth up to  
32  
33 age 80 (0-4, 5-9, 10-14, ..., 70-74, 75-79), and additionally for the specific age ranges 0-  
34  
35 14 and 15-49.  
36  
37  
38  
39  
40  
41  
42  
43  
44  
45

### 46 *Approach*

47  
48 We report life expectancy at birth for males and females for all seventeen countries, for  
49  
50 the period 1958-2007.<sup>a</sup> In keeping with published methodology, for each year we identify  
51  
52 the highest recorded life expectancy i.e. the leader.<sup>1,6,7</sup> These point estimates define a  
53  
54  
55

---

56  
57 <sup>a</sup> The latest year available for the United States was 2007. The earliest available year for West Germany  
58 was 1956. We retained the years 1958 to 2007 in order to have five 10-year periods.  
59  
60

1  
2  
3 | “maximum frontier.” We also estimate the average life expectancy recorded for the  
4  
5 sixteen countries (arithmetic average), besides the US, i.e. the comparators. Finally, we  
6  
7 compare the US life expectancy to both the leader and the comparators. We do this by  
8  
9 calculating how many years behind the leader the US and the comparators fall in a given  
10  
11 year. For instance, if in 2007 the US had a life expectancy which was closest to the life  
12  
13 expectancy of the leader in 1986, then the US is said to have been 21 years behind the  
14  
15 leader in 2007.  
16  
17

18  
19  
20 In order to investigate to what extent the health gap varies across different age  
21  
22 groups, we analyze mortality rates for males and females for the age groups described  
23  
24 above, for the period 1958-2007. Similarly, we identify the country with the lowest  
25  
26 recorded mortality rates in a given year (leader), which defines a “minimum frontier,”  
27  
28 and we compute the comparators’ average observed mortality rates per age group. Note  
29  
30 that this leader is not necessarily the same as the leader in life expectancy. Finally, we  
31  
32 calculate how many years behind the US and the comparators are for each age group and  
33  
34 each year of the period 1958-2007.  
35  
36  
37  
38  
39

## 40 41 **Results**

### 42 43 44 45 *Years behind for life expectancy*

46  
47 Figure 1.a shows, over the period 1958-2007, for male and female life expectancy, the  
48  
49 evolution of the leader, the US and the comparators. In any given year, the leader, the US  
50  
51 and the comparators had higher life expectancies for females than for males. The US life  
52  
53 expectancy for males was lower than the comparators’ life expectancy for males; the  
54  
55 differential of life expectancy between the US and the leader diminished from the late  
56  
57  
58  
59  
60

1  
2  
3 1950s to the late 1970s, and then stayed about the same after the late 1970s, while the  
4 differential of life expectancy between the US and the comparators slightly increased  
5 after the late 1970s. For females, the US life expectancy was about the same as the  
6 comparators from the late 1950s to the late 1970s, and both converged slightly toward the  
7 leader. Notably, after the late 1970s, the life expectancy for US females started to diverge  
8 substantially from both the comparators and the leader; the US presented a rate of  
9 increase of about 1 year per decade, far below the 2-3 years per decade of the leader.  
10 Tables A.1 and A.2 in the Supplementary Appendix show, for males and females, the life  
11 expectancy across countries for each decade from 1958.

12  
13  
14  
15  
16  
17  
18  
19  
20  
21  
22  
23  
24  
25  
26  
27  
28  
29  
30  
31  
32  
33  
34  
35  
36  
37  
38  
39  
40  
41  
42  
43  
44  
45  
46  
47  
48  
49  
50  
51  
52  
53  
54  
55  
56  
57  
58  
59  
60

FIGURE 1 AROUND HERE

The number of years behind the leader, for male and female life expectancy, for the US and the comparators, is presented in figure 1.b. In addition, the number of years behind the comparators for the US is also presented in figure A.1 (Supplementary Appendix). Because the same quantity of years behind may correspond to different absolute gaps in life expectancy depending on the trends in the comparator countries, figure A.5 (Supplementary Appendix) also reports, for males and females, the gap in life expectancy between the US and the comparators, and between the US and the leader. Over the period 1958-2007, for male life expectancy, the US always fell behind the comparators, up to 25 years behind the comparators (figure A.1), and fell between 15 and 35 years behind the leader. Up to about the late 1970s, both the US and the comparators presented a similar trend in increasing years behind the leader. Then, over the course of only a few years, the comparators narrowed the distance from 25 to 10 years behind,

1  
2  
3 followed by a slightly decreasing trend until 2007 where it was about 5 years behind the  
4  
5 leader. In contrast, the US narrowed the distance with the leader abruptly in the late  
6  
7 1980s (slightly delayed relative to the comparators), and then remained at about the same  
8  
9 level of 20 years behind the leader through 2007 leading to substantial divergence from  
10  
11 the comparators ([about 15 years behind the comparators in 2007](#)).

12  
13  
14 Over the period 1958-2007, the life expectancy for US females was [up to 10 years](#)  
15  
16 [behind the comparators and](#) between 10 and 20 years behind the leader, which was better  
17  
18 than US male life expectancy but hid a disturbing trend (figure 1.b). Up to about the late  
19  
20 1970s, US females and the comparators presented similar trajectories: starting around 10  
21  
22 years behind the leader, they trailed to around 20, but made a comeback to where they  
23  
24 were, again, about 10 years behind the leader. Then, the US substantially diverged from  
25  
26 the comparators, falling further and further behind at a steady pace (figure 1.b; [figure](#)  
27  
28 [A.1](#)). In 1998-07, the US was about [10](#) years behind the [comparators and about 20 years](#)  
29  
30 [behind the leader, with a life expectancy of](#) 79.9 years (Supplementary Appendix, table  
31  
32 A.2).  
33  
34  
35  
36  
37  
38  
39  
40

#### 41 *Years behind in age-specific mortality rates*

42  
43 Figure 2 shows the number of years behind the leader the US and the comparators were  
44  
45 for [five](#)-year age groups, for males and females and two time periods, the early 1960s  
46  
47 (1958-67) and the early 2000s (1998-07). [The number of years behind the comparators](#)  
48  
49 [the US was for five-year age groups is also presented in figure A.2 \(Supplementary](#)  
50  
51 [Appendix](#)). In the early 1960s, the US and the comparators presented similar age  
52  
53 distributions for the number of years behind the leader, for males and females. Males  
54  
55 presented a larger number of years behind than females across almost all age groups;  
56  
57  
58  
59  
60

1  
2  
3 females in both the US and the comparators presented almost identical age distributions  
4  
5 for years behind the leader. The situation in the early 2000s was very different for the US.  
6  
7 For females, the comparators presented a pattern similar to the early 1960s, between 10  
8  
9 and 20 years behind the leader across all age groups; the US presented a larger number of  
10  
11 years behind the leader but most significantly the number of years behind the leader had  
12  
13 increased substantially between age 15 and age 50 (about 30 years behind the  
14  
15 comparators; figure A.2). For males, the comparators had substantially reduced the  
16  
17 number of years behind the leader beyond age 45, but increased the number of years  
18  
19 behind the leader from age 15 to age 40; the US had also substantially reduced the  
20  
21 number of years behind the leader after age 45, and like the comparators, had increased  
22  
23 the number of years behind the leader between age 10 and age 45 (about 30 years behind  
24  
25 the comparators; figure A.2).

26  
27  
28  
29  
30  
31  
32  
33  
34  
35  
36  
37  
38  
39  
40  
41  
42  
43  
44  
45  
46  
47  
48  
49  
50  
51  
52  
53  
54  
55  
56  
57  
58  
59  
60

FIGURE 2 AROUND HERE

Figure 3.a shows time trends in the probability of dying between age birth and age 15 (15q0) for the leader, the US and the comparators. Tables A.3 and A.4 in the Supplementary Appendix show values for 15q0 across countries. In a given year, the leader, the US and the comparators had higher mortality rates for males than for females. For both males and females, from the early 1960s to the early 2000s, the differential of 15q0 between the US and the comparators stayed similar (slightly increasing), and the differential of 15q0 between the US and the leader also stayed similar (slightly decreasing). The US 15q0 started lower than the comparators' 15q0 for both males and females; in the 1970s, the US and the comparators crossed. For both males and females,

1  
2  
3 the comparators' 15q0 was converging toward the leader throughout the entire time  
4  
5 period.  
6  
7

8  
9  
10 **FIGURE 3 AROUND HERE**  
11

12  
13  
14  
15 Figure 4.a shows time trends for the probability of dying between age 15 and age  
16  
17 50 (35q15) for the leader, the US and the comparators. Tables A.5 and A.6 in the  
18  
19 Supplementary Appendix show values for 35q15 across countries. In a given year, the  
20  
21 leader, the US and the comparators had substantially higher mortality rates for males than  
22  
23 for females. For both males and females, the US 35q15 was always higher than the  
24  
25 comparators' 35q15; the differential of 35q15 between the US and the comparators and  
26  
27 between the US and the leader stayed about the same from 1958 to 2007, for males.  
28  
29 However, for females, the US was slightly diverging from both the comparators and the  
30  
31 leader from 1980 onward.  
32  
33  
34  
35  
36  
37  
38  
39  
40  
41  
42

43 **FIGURE 4 AROUND HERE**  
44

45  
46 Figures 3.b and 4.b show the number of years behind the leader the US and the  
47  
48 comparators were for the 0-14 and 15-49 age groups, for males and females, over the  
49  
50 1958-2007 period. The number of years behind the comparators the US was, for the  
51  
52 mortality rates in the 0-14 and 15-49 age groups, is also presented in figures A.3 and A.4  
53  
54 (Supplementary Appendix). Figures A.6 and A.7 (Supplementary Appendix) also report,  
55  
56 for males and females, the gap in 15q0 and 35q15 between the US and the comparators,  
57  
58 and between the US and the leader. For the 0-14 age group, up to the late 1970s, the US  
59  
60



1  
2  
3 and the comparators showed somewhat similar trajectories, between 10 and 20 years  
4  
5 behind the leader (both males and females); on average, the US was slightly ahead of the  
6  
7 comparators then. Afterwards, while the comparators consistently kept pace about 10  
8  
9 years behind the leader, the US saw an increase up to 15 years behind the comparators  
10  
11 (figure A.3) and up to between 20 and 30 years behind the leader through 2007 (both  
12  
13 males and females). For the 15-49 age group, the US was always behind the comparators  
14  
15 over the whole period; the US consistently diverged from the leader. The male trajectory,  
16  
17 for the US and the comparators, was similar until the early 1990s, when the comparators  
18  
19 started converging on the leader, dropping from about 40 to 15 years behind the leader in  
20  
21 2007; meanwhile, the US kept diverging with years behind the comparators increasing  
22  
23 from about 10 years in 1990 to about 45 years in 2007 (figure A.4), a corresponding  
24  
25 increase in years behind the leader from about 45 years in 1990 to about 55 years. The  
26  
27 female trajectory, for the US and the comparators, was somewhat similar until the mid-  
28  
29 1970s (20-25 years behind the leader then), when the comparators kept the distance  
30  
31 behind the leader below 20 years (below 10 years behind the leader in 2007), while the  
32  
33 US continued diverging, being about 40 years behind the comparators and about 50 years  
34  
35 behind the leader in 2007.  
36  
37  
38  
39  
40  
41  
42  
43  
44

## 45 Discussion

46  
47 This paper applies a sensitive measure of national performance – years behind – to  
48  
49 comparison of US mortality rates with those of other high-income countries. As has been  
50  
51 well documented,<sup>1,8</sup> US life expectancy is lower and mortality rates are higher than in  
52  
53 other high-income or comparator countries. Life expectancy results summarize and  
54  
55 aggregate an heterogeneous combination of distinct age-specific mortality measures and  
56  
57  
58  
59  
60

1  
2  
3 patterns, hence we further examined mortality rates across different age groups. Most  
4  
5 strikingly, for both males and females, the typical high-income country had achieved, by  
6  
7 the 1970s, a mortality rate in the age group 15-49 that the US failed to achieve until about  
8  
9 2007: i.e., the US, in 2007 fell about 40 years behind the average (and 50 years behind  
10  
11 the leader). A similar if less pronounced pattern appears for life expectancy and for  
12  
13 mortality under age 15. The US now lies far behind other high-income countries, but this  
14  
15 was not always so. The detailed results of this paper allow for tracking the magnitude of  
16  
17 US divergence and for (approximate) timing of when it began. Although our results  
18  
19 contain noise a key result emerges: sometime in the late 1970s the US stopped tracking  
20  
21 its comparators and began to fall behind (table 1). At different rates for different  
22  
23 indicators the US fell further and further behind over subsequent three decades. The  
24  
25 finding is remarkably striking for US females.  
26  
27  
28  
29  
30  
31  
32  
33

#### 34 TABLE 1 AROUND HERE

35  
36  
37  
38 The analysis presents several strengths. It uses full life tables, for males and  
39  
40 females, for seventeen high-income countries for an extended time series, and it allows  
41  
42 for tracking the timing of US divergence. This provides a specific criterion for assessing  
43  
44 the explanatory power of causes proposed for poor performance, and narrows the range  
45  
46 of potentially important determinants. In particular, trends in mortality rates provide a  
47  
48 starting point for assessing the importance of the determinants of health.<sup>9,10</sup> The analysis  
49  
50 also has limitations. For instance, it does not aim at fully explaining in detail why the US  
51  
52 mortality gap emerged and grew, as it essentially proposes a tool for others making those  
53  
54 assessments. In addition, while the results highlight a particular period in time when the  
55  
56  
57  
58  
59  
60

1  
2  
3 US fell behind other countries, one should be cautious in interpretation as there may be a  
4 lag time between any determinant change and its population-level effect on mortality.  
5  
6 The timing of effects is delicate as different policies may have different temporal spans  
7 (e.g. tobacco control). It may take a long time to reduce mortality gaps, if appropriate  
8 interventions are not implemented rapidly. Some diseases may be amenable to both  
9 immediate curative and preventive interventions (e.g. reduction of blood pressure)  
10 whereas certain habits/conditions independent of the current state of things, such as  
11 tobacco consumption<sup>11</sup> and obesity,<sup>12,13</sup> can affect mortality many decades later. Finally,  
12 the years behind results may be more stable when the comparator is the average of all the  
13 other countries rather than the leading country as there may be rapid changes in the  
14 leading country (tables A.1-4, Supplementary Appendix). Hence, we also presented  
15 results for years behind the comparators (figures A.1-4; Supplementary Appendix).  
16  
17  
18  
19  
20  
21  
22  
23  
24  
25  
26  
27  
28  
29  
30

31 Concern for the poor US performance on mortality prompted major investigations  
32 by the US National Academy of Sciences<sup>1,8</sup> into its nature (in terms of age groups and  
33 conditions) and its causes. Major potential causes that have been explored include cross-  
34 country differences in the level and equality of income, in level of education, in social  
35 cohesion, in a broad range of specific risk factors, and in the level and quality of  
36 expenditures on the health care system. The National Research Council (NRC) examined  
37 the diverging trends in mortality between the US and others with high income, looking at  
38 specific causes of deaths. NRC researchers estimated that a large part of the life  
39 expectancy difference was attributable to smoking, amounting to 80 and 40% of the  
40 difference for females and males, respectively.<sup>11</sup> Less dramatically, they suggested that  
41 20 to 33% of the life expectancy gap could be attributable to higher rates of obesity.<sup>12</sup>  
42 They argued that smoking and obesity could well explain the rise of mortality recorded in  
43  
44  
45  
46  
47  
48  
49  
50  
51  
52  
53  
54  
55  
56  
57  
58  
59  
60

1  
2  
3 adult men and women over the last decades.<sup>14</sup> Other research has shown that chronically  
4 ill US patients tend to have less access to care, and benefit from less efficient and  
5 organized care, compared to counterparts in other high-income countries.<sup>15</sup> Beyond  
6 substantial healthcare spending, social welfare spending is a strong determinant for  
7 population health.<sup>16</sup> Overemphasizing individual risk factors can obscure the importance  
8 of key determinants of health such as financing and delivery.<sup>17</sup> Constructively, these  
9 determinants offer the possibility that political commitment inside and outside the health  
10 sector can make real improvements in population health.<sup>16,17</sup> Finally, the “compression”  
11 of older age mortality from 1958-67 to 1998-07 in the US may be attributable to the  
12 Medicare program introduced in 1965.  
13  
14  
15  
16  
17  
18  
19  
20  
21  
22  
23  
24  
25

26  
27 It is not our purpose to reiterate the conclusions of the National Academies’  
28 assessments. Rather our conclusions point to an additional and quite specific criterion for  
29 judging the explanatory power of potential explanations for poor performance in the US.  
30 Since we conclude divergence to have begun in the late 1970s, potential explanations like  
31 racial diversity, lack of health insurance and high income inequality in the US become  
32 less plausible. Racial diversity and income inequality were high, and insurance coverage  
33 low in the US in the 1970s when the US was performing well on health. Establishing a  
34 time for the beginning of the US divergence helps in identifying the effects of the broader  
35 social policy arena on health,<sup>18</sup> and in narrowing the range of potentially important  
36 determinants, and remedies.  
37  
38  
39  
40  
41  
42  
43  
44  
45  
46  
47  
48  
49

50 Seeking potential explanations, we examined whether the more advantaged  
51 population groups presented similar trends to the average of comparator countries while  
52 looking at the maximum and minimum life expectancy (by county) and the average white  
53 and black life expectancy (by county) in the US<sup>19</sup> (figure A.8, Supplementary Appendix).  
54  
55  
56  
57  
58  
59  
60

1  
2  
3 We found however that maximum male/female and white male/female life expectancy  
4 followed a somewhat distinct trajectory in recent decades. Likewise, the divergence from  
5 the 1970s could be related to a lack of universal coverage with unequal treatment access  
6 and coverage at a time when many treatments for cardiovascular disease (CVD) (e.g.  
7 anti-hypertensives, statins) became available. Using OECD data,<sup>20</sup> we examined whether  
8 this divergence was following declines in CVD mortality. We found on the contrary that  
9 US CVD mortality reduced more rapidly in the late 1970s compared to comparator  
10 countries (figure A.9, Supplementary Appendix). Recent research<sup>21</sup> showed that from  
11 1983 to 1999, life expectancy declined significantly in 11 US counties for men and in 180  
12 counties for women. These declines were caused by increased mortality from lung  
13 cancer, chronic obstructive pulmonary disease, diabetes, and were no longer compensated  
14 for by the CVD mortality decline.<sup>21</sup>

15  
16  
17 Measuring health system performance will remain difficult: health outcomes  
18 depend on the health system together with non-medical socio-economic and geographical  
19 determinants, and can be affected by favorable risk factors. Assessing performance in  
20 health in terms of “years behind” enables identifying trends and rapid changes in  
21 outcomes, for which researchers can then try to identify explanations. The years behind  
22 measure offers an intuitive and generalizable approach to measuring country performance  
23 in health, as well as convergent and divergent patterns, and can be readapted to various  
24 health indicators, for diverse disease- and condition-related outcomes. We suggest that  
25 this approach would also be valuable for the evaluation of US performance on specific  
26 causes of death and conditions, facilitating the design of policies that impact health and  
27 social risk factors for the most burdened populations.

### **Acknowledgements**

The authors received valuable comments from Laudy Aron. We thank Anna Peeters and Goodarz Danaei for their constructive and valuable contributions on our work.

### **Contributors**

SV and DTJ designed the study, conducted the analysis, interpreted the data and drafted the original manuscript.

### **Funding**

This work was supported by the Bill & Melinda Gates Foundation through the Disease Control Priorities Network grant to the University of Washington, and by the National Research Council of the United States National Academies.

### **Competing interests**

None declared

### **Data sharing statement**

There is no additional data available.

## References

1. Crimmins EM, Preston SH, Cohen B, editors. *Explaining divergent levels of longevity in high-income countries*. Washington, DC: National Academies Press, 2011.
2. Sicherl P. Time-distance as a dynamic measure of disparities in social and economic development. *Kyklos* 1973; 26(3):559-575.
3. Kulkarni SC, Levin-Rector A, Ezzati M, Murray CJL. Falling behind: life expectancy in US counties from 2000 to 2007 in an international context. *Population Health Metrics* 2011; 9(1):16.
4. Human Mortality database. <http://www.mortality.org/> (accessed 30 Aug 2011).
5. Ho JH, Preston SH. US mortality in an international context: age variations. *Population and Development Review* 2010; 36(4):749-773.
6. Oeppen J, Vaupel JW. Broken limits to life expectancy. *Science* 2002; 296:1029-31.
7. Vallin J, Meslé F. The segmented trend line of highest life expectancies. *Population and Development Review* 2009; 35(1):159-187.
8. Woolf S, Aron L, editors. *US health in international perspectives: shorter lives, poorer health*. Washington, DC: National Academies Press, 2013.
9. Verguet S, Jamison DT. Performance in rate of decline of adult mortality in the OECD, 1970-2010. *Health Policy* 2013; 109(2):137-42.
10. Verguet S, Jamison DT. Estimates of performance in the rate of decline of under-five mortality for 113 low- and middle-income countries, 1970-2010. *Health Policy and Planning* 2013; doi:10.1093/heapol/czs143.
11. Preston SH, Gleij DA, Wilmoth JR. Contribution of smoking to international differences in life expectancy. In: Crimmins EM, Preston SH, Cohen B (eds). *International Differences in Mortality at Older Ages: Dimensions and Sources*. Washington, DC: The National Academies Press, 2010.
12. Alley DE, Lloyd J, Shardell M. Can obesity account for cross-national differences in life-expectancy trends? In: Crimmins EM, Preston SH, Cohen B (eds).

- 1  
2  
3 International Differences in Mortality at Older Ages: Dimensions and Sources.  
4 Washington, DC: The National Academies Press, 2010.  
5  
6
- 7 13. Comanor WS, Frech HE III, Miller RD Jr. Is the United States an outlier in health  
8 care and health outcomes? *International Journal of Health Care Finance and*  
9 *Economics* 2006; 6:3-23.  
10  
11
- 12 14. Preston S, Ho J. Low life expectancy in the United States: is the health care  
13 system at fault? In: Crimmins EM, Preston SH, Cohen B (eds). *International*  
14 *Differences in Mortality at Older Ages: Dimensions and Sources.* Washington,  
15 DC: The National Academies Press, 2010.  
16  
17
- 18 15. Schoen C, Osborn R, How SKH, Doty MM, Peugh J. In chronic condition:  
19 experiences of patients with complex health care needs, in eight countries, 2008.  
20 *Health Affairs* 2009; 28(1):w1-w16.  
21  
22
- 23 16. Stuckler D, Basu S, McKee M. Budget crises, health, and social welfare  
24 programmes. *British Medical Journal* 2010; 340: doi.10.1136/bmj.c3311.  
25  
26
- 27 17. Geneau R, Stuckler D, Stachenko S, et al. Raising the priority of preventing  
28 chronic diseases: a political process. *Lancet* 2010; 376:1689-1698.  
29  
30
- 31 18. Dow WH, Rehkopf DH. Socioeconomic gradients in health in international and  
32 historical context. *Annals of the New York Academy of Sciences* 2010; 1186:24-  
33 36.  
34  
35
- 36 19. Institute for Health Metrics and Evaluation. Life expectancy in US counties 1989-  
37 2009. [http://www.healthmetricsandevaluation.org/news-events/event/ihme-](http://www.healthmetricsandevaluation.org/news-events/event/ihme-release-county-life-expectancy-results-14th-annual-health-journalism-conferen#/data-methods)  
38 [release-county-life-expectancy-results-14th-annual-health-journalism-](http://www.healthmetricsandevaluation.org/news-events/event/ihme-release-county-life-expectancy-results-14th-annual-health-journalism-conferen#/data-methods)  
39 [conferen#/data-methods](http://www.healthmetricsandevaluation.org/news-events/event/ihme-release-county-life-expectancy-results-14th-annual-health-journalism-conferen#/data-methods) (accessed 30 Apr 2013).  
40  
41
- 42 20. Organisation for Economic Co-operation and Development. OECD.StatExtracts.  
43 <http://stats.oecd.org/> (accessed 30 Apr 2013).  
44  
45
- 46 21. Ezzati M, Friedman AB, Kulkarni SC, Murray CJL. The reversal of fortunes:  
47 trends in county mortality and cross-county mortality disparities in the United  
48 States. *PloS Medicine* 2008; 5(4):e66.  
49  
50  
51  
52  
53  
54  
55  
56  
57  
58  
59  
60



**Figure 1.** Evolution of life expectancy and years behind the leader for the leader, the US, and the average of sixteen comparator high-income countries, males and females, 1958-2007

(a) Life expectancy

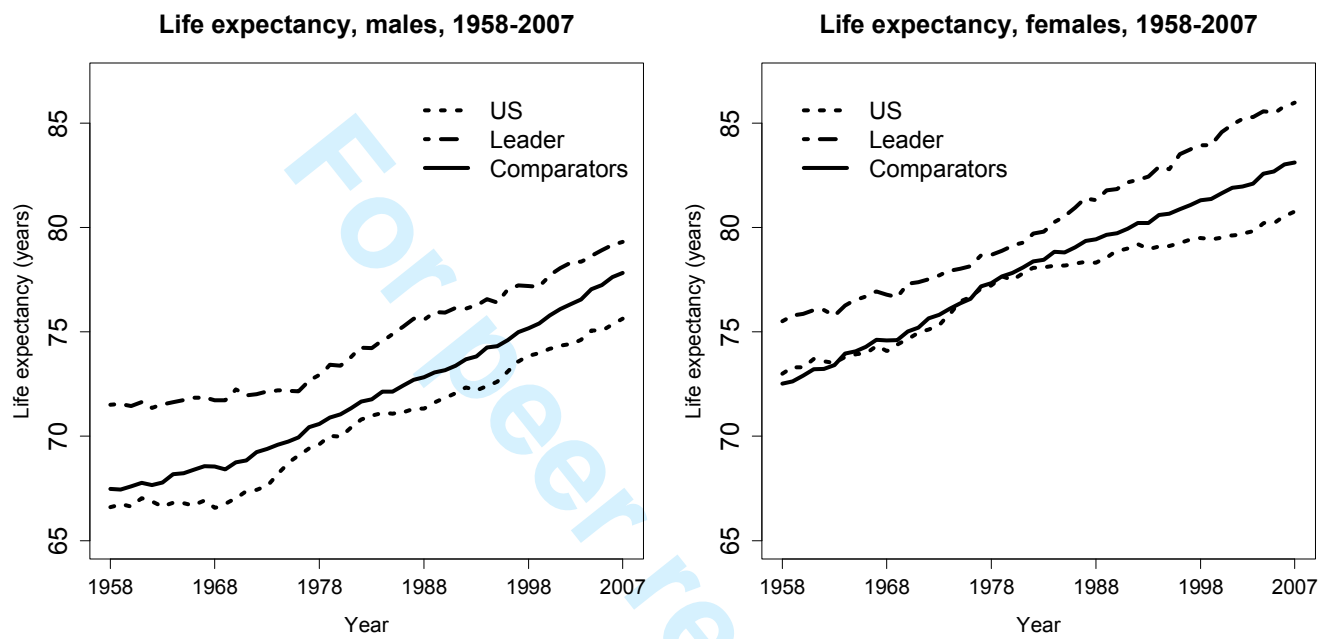

(b) Years behind the leader

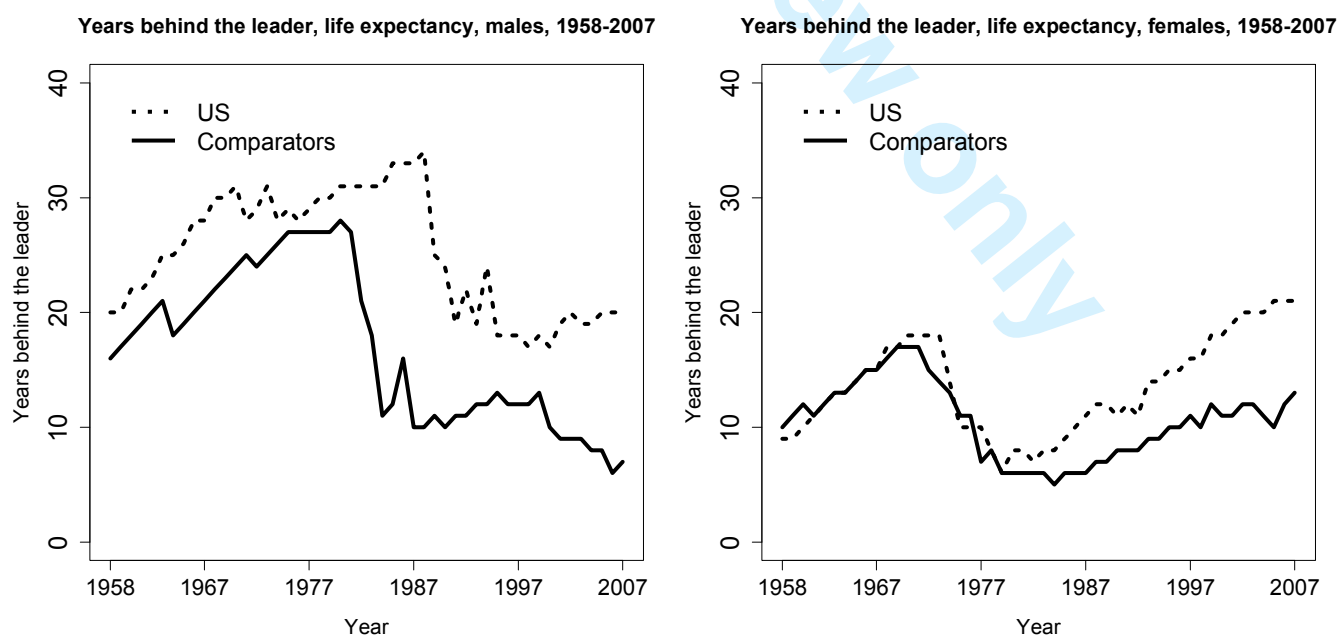

**Figure 2.** Number of years behind the leader for mortality rates across age groups, for the US and the average of sixteen comparator high-income countries, males and females, early 1960s and early 2000s

(a) Males

Years behind the leader, mortality rates, males, early 1960s



Years behind the leader, mortality rates, males, early 2000s

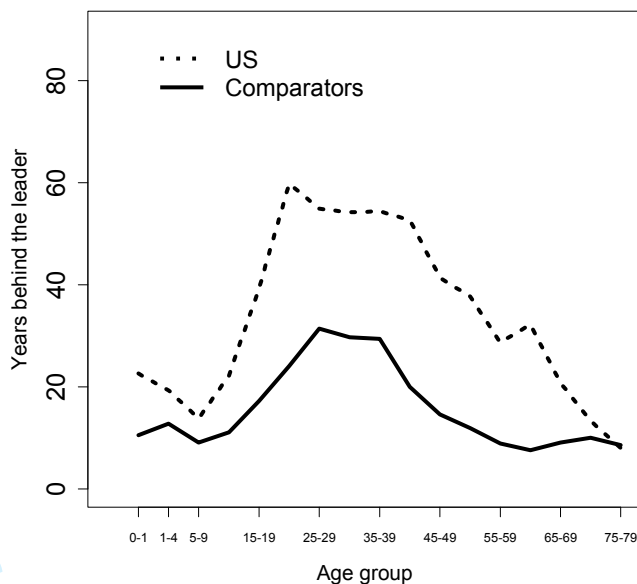

(b) Females

Years behind the leader, mortality rates, females, early 1960s

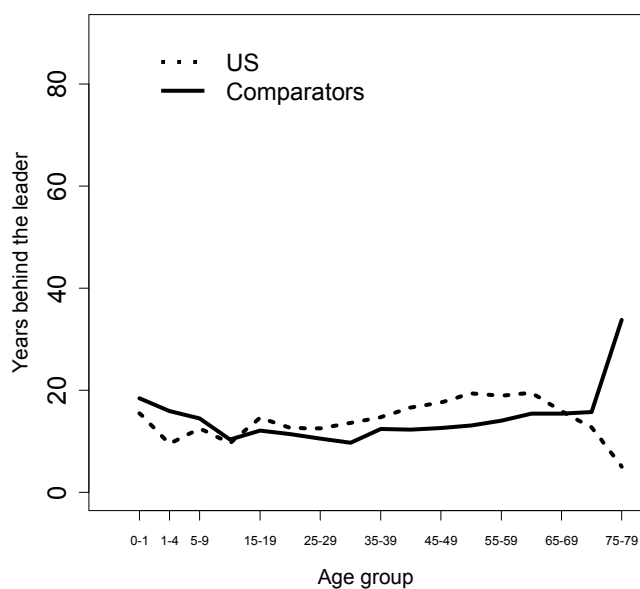

Years behind the leader, mortality rates, females, early 2000s

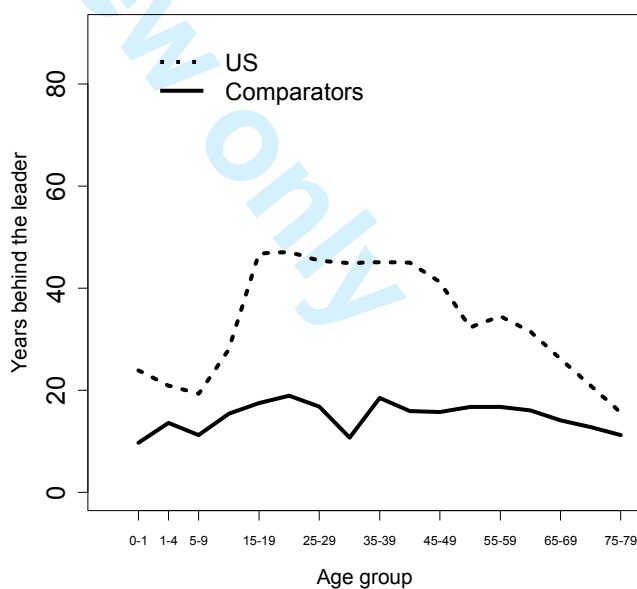

Note: Early 1960s refers to the period 1958-67 and early 2000s refers to 1998-2007.

**Figure 3.** Evolution of mortality rates and years behind the leader in the 0-14 age group, for the leader, the US, and the average of sixteen comparator high-income countries, males and females, 1958-2007

(a) Mortality rates



(b) Years behind the leader



Note: 15q0 is defined as the probability of dying from birth through age 14 at then prevailing age-specific mortality rates.

**Figure 4.** Evolution of mortality rates and years behind the leader in the 15-49 age group, for the leader, the US, and the average of sixteen comparator high-income countries, males and females, 1958-2007

(a) Mortality rates

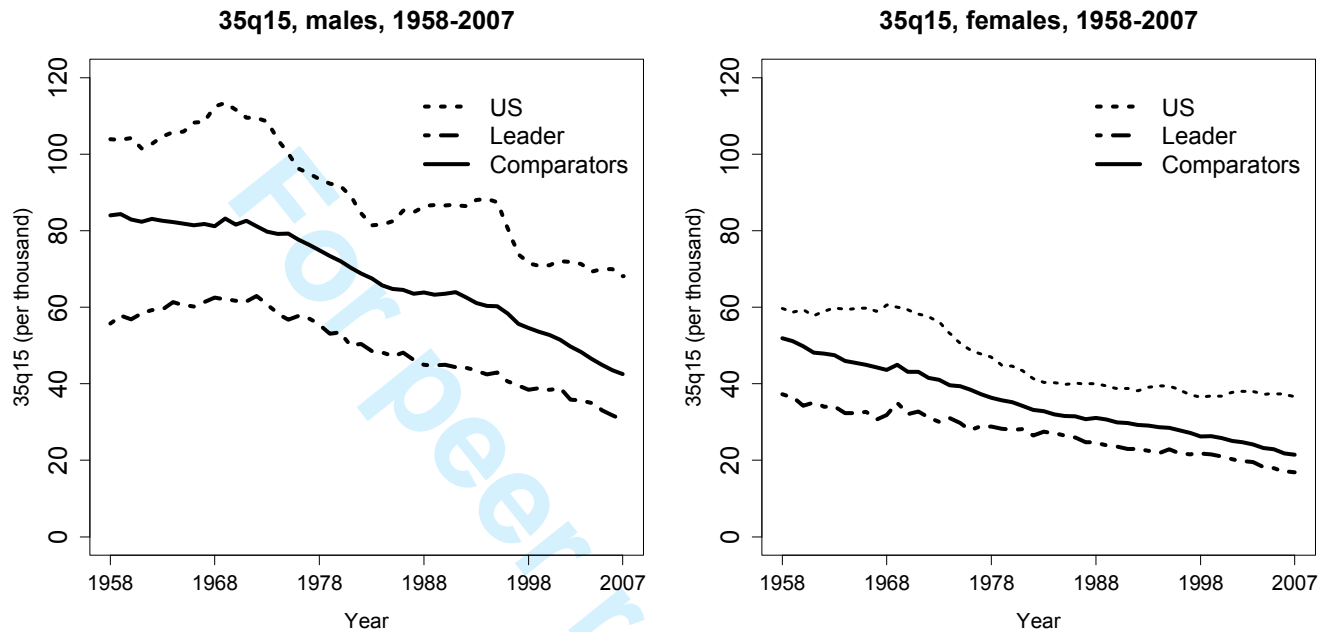

(b) Years behind the leader

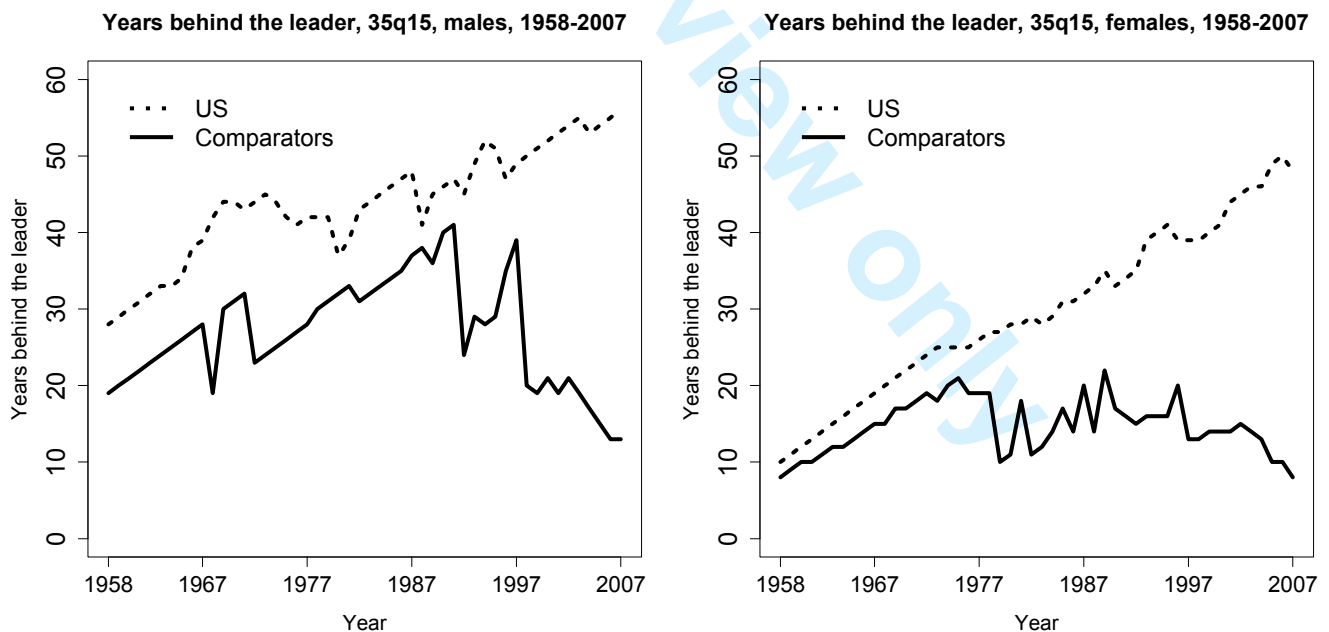

Note: 35q15 is defined as the probability of dying from age 15 through age 49 at then prevailing age-specific mortality rates.

**Table 1.** Timing of US divergence from the average of sixteen comparator high-income countries, for life expectancy, 15q0, and 35q15, males and females, 1958-2007

| Indicator       | Males                                                                         | Females                                                             |
|-----------------|-------------------------------------------------------------------------------|---------------------------------------------------------------------|
| Life expectancy | Late 1970s<br>(temporary reconvergence late '80s to late '90s)                | Late 1970s                                                          |
| 15q0            | Late 1970s<br>(US had lower mortality than comparators before 1965)           | Late 1970s<br>(US had lower mortality than comparators before 1965) |
| 35q15           | About 1990<br>(US already substantially behind comparators before divergence) | Late 1970s<br>(more rapid divergence after about 1990)              |

Note: 15q0 is defined as the probability of dying from birth through age 14 at then prevailing age-specific mortality rates; 35q15 is defined as the probability of dying from age 15 through age 49 at then prevailing age-specific mortality rates.

## Supplementary Appendix

**Table A.1.** Evolution of male life expectancy for the US, and sixteen other high-income countries, 1958-67 to 1998-2007

**Table A.2.** Evolution of female life expectancy for the US, and sixteen other high-income countries, 1958-67 to 1998-2007

**Table A.3.** Evolution of male 15q0 for the US, and sixteen other high-income countries, 1958-67 to 1998-2007

**Table A.4.** Evolution of female 15q0 for the US, and sixteen other high-income countries, 1958-67 to 1998-2007

**Table A.5.** Evolution of male 35q15 for the US, and sixteen other high-income countries, 1958-67 to 1998-2007

**Table A.6.** Evolution of female 35q15 for the US, and sixteen other high-income countries, 1958-67 to 1998-2007

**Figure A.1.** Evolution of years behind the average of sixteen comparator high-income countries for US life expectancy, males and females, 1958-2007

**Figure A.2.** Evolution of years behind the average of sixteen comparator high-income countries for US mortality rates across age groups, males and females, early 1960s and early 2000s

**Figure A.3.** Evolution of years behind the average of sixteen comparator high-income countries for US mortality rates in the 0-14 age group, males and females, 1958-2007

**Figure A.4.** Evolution of years behind the average of sixteen comparator high-income countries for US mortality rates in the 15-49 age group, males and females, 1958-2007

**Figure A.5.** Gap in life expectancy between the US and the leader, and between the US and the average of sixteen comparator high-income countries, males and females, 1958-2007

**Figure A.6.** Gap in mortality rates in the 0-14 age group between the US and the leader, and between the US and the average of sixteen comparator high-income countries, males and females, 1958-2007

**Figure A.7.** Gap in mortality rates in the 15-49 age group between the US and the leader, and between the US and the average of sixteen comparator high-income countries, males and females, 1958-2007

**Figure A.8.** Evolution of life expectancy for the leader, the US, and the average of sixteen comparator high-income countries, males and females, 1958-2007

**Figure A.9.** Evolution of mortality rates (per 100,000) for diseases of the circulatory system and ischemic heart disease for the US, and the average of sixteen comparator high-income countries, males and females, 1960-2010

For peer review only

1  
2  
3  
4  
5  
6  
7  
8  
9  
10  
11  
12  
13  
14  
15  
16  
17  
18  
19  
20  
21  
22  
23  
24  
25  
26  
27  
28  
29  
30  
31  
32  
33  
34  
35  
36  
37  
38  
39  
40  
41  
42  
43  
44  
45  
46  
47  
48  
49  
50  
51  
52  
53  
54  
55  
56  
57  
58  
59  
60

**Table A.1.** Evolution of male life expectancy for the US, and sixteen other high-income countries, 1958-67 to 1998-2007

| Life expectancy (years) | 1958-67    | 1966-77    | 1978-87    | 1988-97    | 1998-07    |
|-------------------------|------------|------------|------------|------------|------------|
| Above 80                |            |            |            |            |            |
| 75 to 80                |            |            |            | JPN (76.3) | JPN (78.2) |
|                         |            |            |            |            | AUS (77.9) |
|                         |            |            |            |            | SWE (77.9) |
|                         |            |            |            |            | CHE (77.9) |
|                         |            |            |            |            | ITA (77.3) |
|                         |            |            |            |            | CAN (77.2) |
|                         |            |            |            |            | NOR (76.8) |
|                         |            |            |            |            | ESP (76.4) |
|                         |            |            |            |            | NLD (76.4) |
|                         |            |            |            |            | UK (76.1)  |
|                         |            |            |            |            | FRA (76.0) |
|                         |            |            |            |            | DEU (76.0) |
|                         |            |            |            |            | AUT (75.9) |
|                         |            |            |            |            | DNK (75.0) |
| 70 to 75                | SWE (71.6) | SWE (72.1) | JPN (74.2) | SWE (75.5) | FIN (74.8) |
|                         | NLD (71.2) | NOR (71.4) | SWE (73.4) | CHE (74.8) | USA (74.7) |
|                         | NOR (71.2) | NLD (71.3) | CHE (72.9) | AUS (74.6) | PRT (74.1) |
|                         | DNK (70.4) | DNK (71.0) | NLD (72.8) | CAN (74.6) |            |
|                         |            | CHE (70.8) | ESP (72.7) | NLD (74.2) |            |
|                         |            | JPN (70.7) | NOR (72.5) | NOR (74.2) |            |
|                         |            |            | CAN (72.4) | ITA (74.2) |            |
|                         |            |            | AUS (71.8) | ESP (74.0) |            |
|                         |            |            | ITA (71.6) | UK (73.5)  |            |
|                         |            |            | DNK (71.5) | FRA (73.3) |            |
|                         |            |            | UK (71.1)  | DEU (73.2) |            |
|                         |            |            | FRA (70.8) | AUT (72.8) |            |
|                         |            |            | DEU (70.7) | DNK (72.6) |            |
|                         |            |            | USA (70.7) | USA (72.3) |            |
|                         |            |            |            | FIN (72.0) |            |
|                         |            |            |            | PRT (71.3) |            |
| 65 to 70                | CHE (68.9) | ESP (69.8) | FIN (69.9) |            |            |
|                         | CAN (68.4) | CAN (69.7) | AUT (69.7) |            |            |
|                         | UK (68.1)  | ITA (69.1) | PRT (69.0) |            |            |
|                         | AUS (67.8) | UK (69.1)  |            |            |            |
|                         | ESP (67.4) | FRA (68.6) |            |            |            |
|                         | FRA (67.3) | AUS (68.5) |            |            |            |
|                         | ITA (67.2) | DEU (67.9) |            |            |            |
|                         | DEU (67.2) | USA (67.8) |            |            |            |
|                         | USA (66.8) | AUT (67.3) |            |            |            |
|                         | JPN (66.7) | FIN (66.7) |            |            |            |
|                         | AUT (66.2) |            |            |            |            |
|                         | FIN (65.5) |            |            |            |            |
| Below 65                | PRT (61.6) | PRT (64.9) |            |            |            |

AUS = Australia, AUT = Austria, CAN = Canada, CHE = Switzerland, DEU = West Germany, DNK = Denmark, ESP = Spain, FIN = Finland, FRA = France, ITA = Italy, JPN = Japan, NLD = Netherlands, NOR = Norway, PRT = Portugal, SWE = Sweden, UK = United Kingdom, USA = United States.

Source: Human Mortality Database.



**Table A.2.** Evolution of female life expectancy for the US, and sixteen other high-income countries, 1958-67 to 1998-2007

| Life expectancy (years) | 1958-67                                                                                                                                                                           | 1968-77                                                                                                                                                                                         | 1978-87                                                                                                                                                                                                                                   | 1988-97                                                                                                                                  | 1998-07                                                                                                                                                                                                       |
|-------------------------|-----------------------------------------------------------------------------------------------------------------------------------------------------------------------------------|-------------------------------------------------------------------------------------------------------------------------------------------------------------------------------------------------|-------------------------------------------------------------------------------------------------------------------------------------------------------------------------------------------------------------------------------------------|------------------------------------------------------------------------------------------------------------------------------------------|---------------------------------------------------------------------------------------------------------------------------------------------------------------------------------------------------------------|
| Above 80                |                                                                                                                                                                                   |                                                                                                                                                                                                 |                                                                                                                                                                                                                                           | JPN (82.5)<br>FRA (81.4)<br>CHE (81.4)<br>ESP (81.2)<br>SWE (80.9)<br>CAN (80.8)<br>ITA (80.8)<br>AUS (80.6)<br>NLD (80.2)<br>NOR (80.2) | JPN (85.1)<br>FRA (83.3)<br>CHE (83.2)<br>ESP (83.2)<br>ITA (83.1)<br>AUS (82.9)<br>SWE (82.4)<br>CAN (82.2)<br>NOR (81.9)<br>FIN (81.8)<br>AUT (81.7)<br>DEU (81.6)<br>NLD (81.1)<br>PRT (80.9)<br>UK (80.7) |
| 75 to 80                | NOR (76.1)<br>NLD (75.8)<br>SWE (75.6)                                                                                                                                            | NOR (77.6)<br>SWE (77.5)<br>NLD (77.2)<br>CHE (77.0)<br>CAN (76.8)<br>DNK (76.4)<br>FRA (76.3)<br>JPN (75.9)<br>ESP (75.5)<br>USA (75.5)<br>AUS (75.4)<br>UK (75.3)<br>ITA (75.2)<br>FIN (75.1) | JPN (79.8)<br>CHE (79.6)<br>SWE (79.4)<br>NLD (79.4)<br>CAN (79.3)<br>NOR (79.2)<br>ESP (79.0)<br>FRA (79.0)<br>AUS (78.6)<br>FIN (78.3)<br>ITA (78.2)<br>USA (77.9)<br>DNK (77.5)<br>DEU (77.3)<br>UK (77.0)<br>AUT (76.7)<br>PRT (75.9) | DEU (79.6)<br>FIN (79.6)<br>AUT (79.4)<br>USA (79.0)<br>UK (78.9)<br>PRT (78.5)<br>DNK (77.9)                                            | USA (79.9)<br>DNK (79.7)                                                                                                                                                                                      |
| 70 to 75                | CAN (74.6)<br>CHE (74.6)<br>DNK (74.5)<br>FRA (74.2)<br>AUS (74.2)<br>UK (74.1)<br>USA (73.6)<br>DEU (72.8)<br>FIN (72.6)<br>ITA (72.5)<br>AUT (72.5)<br>ESP (72.5)<br>JPN (71.7) | DEU (74.3)<br>AUT (74.2)<br>PRT (71.5)                                                                                                                                                          |                                                                                                                                                                                                                                           |                                                                                                                                          |                                                                                                                                                                                                               |
| 65 to 70                | PRT (67.5)                                                                                                                                                                        |                                                                                                                                                                                                 |                                                                                                                                                                                                                                           |                                                                                                                                          |                                                                                                                                                                                                               |

AUS = Australia, AUT = Austria, CAN = Canada, CHE = Switzerland, DEU = West Germany, DNK = Denmark, ESP = Spain, FIN = Finland, FRA = France, ITA = Italy, JPN = Japan, NLD = Netherlands, NOR = Norway, PRT = Portugal, SWE = Sweden, UK = United Kingdom, USA = United States.

Source: Human Mortality Database.

**Table A.3.** Evolution of male 15q0 for the US, and sixteen other high-income countries, 1958-67 to 1998-2007 (per 1,000 live births)

|  | 1958-67   | 1968-77  | 1978-87  | 1988-97  | 1998-07  |
|--|-----------|----------|----------|----------|----------|
|  | SWE (24)  | SWE (17) | SWE (11) | SWE (8)  | SWE (5)  |
|  | NLD (28)  | NLD (21) | FIN (12) | JPN (8)  | JPN (6)  |
|  | NOR (29)  | NOR (21) | JPN (12) | FIN (9)  | FIN (6)  |
|  | DNK (31)  | FIN (21) | DNK (14) | DEU (10) | NOR (6)  |
|  | AUS (31)  | DNK (21) | CHE (14) | NOR (10) | ITA (6)  |
|  | FIN (32)  | JPN (22) | NOR (14) | CHE (10) | DEU (7)  |
|  | UK (32)   | CHE (23) | NLD (14) | NLD (10) | AUT (7)  |
|  | CHE (33)  | FRA (25) | CAN (16) | CAN (11) | FRA (7)  |
|  | FRA (37)  | UK (26)  | FRA (16) | DNK (11) | ESP (7)  |
|  | USA (38)  | AUS (26) | AUS (17) | AUT (11) | DNK (7)  |
|  | CAN (39)  | CAN (27) | UK (17)  | FRA (11) | CHE (7)  |
|  | JPN (43)  | USA (28) | DEU (18) | AUS (11) | NLD (8)  |
|  | DEU (43)  | DEU (32) | ESP (18) | UK (11)  | AUS (8)  |
|  | AUT (47)  | ESP (34) | USA (19) | ESP (11) | CAN (8)  |
|  | ITA (56)  | AUT (34) | ITA (19) | ITA (11) | UK (8)   |
|  | ESP (59)  | ITA (36) | AUT (20) | USA (14) | PRT (9)  |
|  | PRT (116) | PRT (69) | PRT (33) | PRT (18) | USA (11) |

AUS = Australia, AUT = Austria, CAN = Canada, CHE = Switzerland, DEU = West Germany, DNK = Denmark, ESP = Spain, FIN = Finland, FRA = France, ITA = Italy, JPN = Japan, NLD = Netherlands, NOR = Norway, PRT = Portugal, SWE = Sweden, UK = United Kingdom, USA = United States.

Source: Human Mortality Database.

Note: 15q0 is defined as the probability of dying from birth through age 14 at then prevailing age-specific mortality rates.

**Table A.4.** Evolution of female 15q0 for the US, and sixteen other high-income countries, 1958-67 to 1998-2007 (per 1,000 live births)

|  | 1958-67   | 1968-77  | 1978-87  | 1988-97  | 1998-07 |
|--|-----------|----------|----------|----------|---------|
|  | SWE (18)  | SWE (13) | FIN (9)  | SWE (6)  | SWE (4) |
|  | NLD (21)  | NOR (15) | SWE (9)  | JPN (7)  | FIN (5) |
|  | NOR (21)  | DNK (15) | JPN (9)  | FIN (7)  | JPN (5) |
|  | DNK (22)  | FIN (15) | CHE (10) | NOR (8)  | NOR (5) |
|  | FIN (24)  | NLD (15) | DNK (10) | DEU (8)  | FRA (5) |
|  | AUS (24)  | JPN (16) | NOR (11) | CHE (8)  | ITA (6) |
|  | CHE (24)  | CHE (17) | NLD (11) | NLD (8)  | DEU (6) |
|  | UK (25)   | FRA (19) | FRA (12) | FRA (8)  | AUT (6) |
|  | FRA (29)  | UK (19)  | CAN (12) | DNK (8)  | DNK (6) |
|  | USA (29)  | AUS (20) | AUS (13) | CAN (8)  | CHE (6) |
|  | CAN (30)  | CAN (20) | UK (13)  | AUT (9)  | ESP (6) |
|  | DEU (33)  | USA (21) | DEU (13) | UK (9)   | NLD (6) |
|  | JPN (34)  | DEU (24) | ESP (14) | AUS (9)  | AUS (6) |
|  | AUT (37)  | AUT (25) | USA (14) | ESP (9)  | UK (7)  |
|  | ITA (47)  | ESP (26) | AUT (15) | ITA (9)  | CAN (7) |
|  | ESP (47)  | ITA (28) | ITA (15) | USA (11) | PRT (7) |
|  | PRT (100) | PRT (55) | PRT (25) | PRT (13) | USA (9) |

AUS = Australia, AUT = Austria, CAN = Canada, CHE = Switzerland, DEU = West Germany, DNK = Denmark, ESP = Spain, FIN = Finland, FRA = France, ITA = Italy, JPN = Japan, NLD = Netherlands, NOR = Norway, PRT = Portugal, SWE = Sweden, UK = United Kingdom, USA = United States.

Source: Human Mortality Database.

Note: 15q0 is defined as the probability of dying from birth through age 14 at then prevailing age-specific mortality rates.

**Table A.5.** Evolution of male 35q15 for the US, and sixteen other high-income countries, 1958-67 to 1998-2007 (per 1,000)

| 1958-67   | 1968-77   | 1978-87  | 1988-97  | 1998-07  |
|-----------|-----------|----------|----------|----------|
| NLD (59)  | NLD (60)  | NLD (50) | JPN (44) | SWE (36) |
| SWE (62)  | SWE (66)  | JPN (55) | NLD (44) | NLD (37) |
| DNK (63)  | NOR (66)  | UK (57)  | SWE (47) | JPN (40) |
| NOR (66)  | UK (67)   | SWE (59) | UK (51)  | CHE (41) |
| UK (71)   | DNK (68)  | NOR (61) | NOR (53) | ITA (41) |
| CHE (78)  | CHE (69)  | ITA (61) | AUS (55) | CAN (44) |
| ESP (79)  | ESP (67)  | CHE (62) | CAN (56) | NOR (45) |
| ITA (79)  | JPN (73)  | ESP (64) | ITA (56) | AUS (46) |
| CAN (84)  | ITA (75)  | AUS (66) | CHE (60) | DEU (46) |
| DEU (85)  | CAN (84)  | CAN (66) | DEU (60) | UK (47)  |
| AUS (87)  | AUS (84)  | DNK (69) | DNK (64) | AUT (50) |
| AUT (94)  | DEU (87)  | DEU (73) | AUT (69) | DNK (52) |
| JPN (95)  | AUT (97)  | FIN (85) | ESP (72) | ESP (53) |
| FRA (97)  | FRA (97)  | USA (87) | FRA (79) | FRA (62) |
| USA (105) | PRT (104) | FRA (87) | FIN (81) | FIN (64) |
| PRT (106) | USA (106) | AUT (87) | USA (85) | USA (71) |
| FIN (115) | FIN (113) | PRT (93) | PRT (90) | PRT (76) |

AUS = Australia, AUT = Austria, CAN = Canada, CHE = Switzerland, DEU = West Germany, DNK = Denmark, ESP = Spain, FIN = Finland, FRA = France, ITA = Italy, JPN = Japan, NLD = Netherlands, NOR = Norway, PRT = Portugal, SWE = Sweden, UK = United Kingdom, USA = United States.

Source: Human Mortality Database.

Note: 35q15 is defined as the probability of dying from age 15 through age 49 at then prevailing age-specific mortality rates.

**Table A.6.** Evolution of female 35q15 for the US, and sixteen other high-income countries, 1958-67 to 1998-2007 (per 1,000)

|  | 1958-67  | 1968-77  | 1978-87  | 1988-97  | 1998-07  |
|--|----------|----------|----------|----------|----------|
|  | NOR (34) | NOR (31) | NOR (28) | JPN (23) | ITA (20) |
|  | NLD (37) | CHE (35) | JPN (28) | ITA (25) | JPN (20) |
|  | SWE (39) | NLD (36) | ESP (29) | SWE (26) | SWE (20) |
|  | CHE (41) | SWE (36) | ITA (29) | NOR (27) | CHE (21) |
|  | DNK (45) | ITA (39) | NLD (30) | AUS (27) | ESP (22) |
|  | CAN (46) | ESP (39) | SWE (30) | ESP (27) | AUS (23) |
|  | UK (46)  | FIN (40) | FIN (31) | CAN (28) | AUT (24) |
|  | ITA (48) | JPN (42) | CHE (31) | CHE (28) | NOR (24) |
|  | FIN (50) | UK (42)  | AUS (33) | NLD (28) | DEU (24) |
|  | DEU (51) | CAN (43) | CAN (34) | UK (29)  | CAN (24) |
|  | AUT (51) | DNK (44) | UK (34)  | FIN (30) | NLD (26) |
|  | AUS (51) | AUT (45) | DEU (36) | DEU (31) | UK (26)  |
|  | ESP (51) | FRA (46) | FRA (37) | AUT (31) | FIN (26) |
|  | FRA (51) | AUS (46) | AUT (38) | FRA (32) | FRA (27) |
|  | PRT (59) | DEU (46) | PRT (41) | PRT (36) | DNK (28) |
|  | USA (59) | PRT (50) | DNK (41) | DNK (37) | PRT (29) |
|  | JPN (65) | USA (55) | USA (42) | USA (39) | USA (37) |

AUS = Australia, AUT = Austria, CAN = Canada, CHE = Switzerland, DEU = West Germany, DNK = Denmark, ESP = Spain, FIN = Finland, FRA = France, ITA = Italy, JPN = Japan, NLD = Netherlands, NOR = Norway, PRT = Portugal, SWE = Sweden, UK = United Kingdom, USA = United States.

Source: Human Mortality Database.

Note: 35q15 is defined as the probability of dying from age 15 through age 49 at then prevailing age-specific mortality rates.

**Figure A.1.** Evolution of years behind the average of sixteen comparator high-income countries for US life expectancy, males and females, 1958-2007

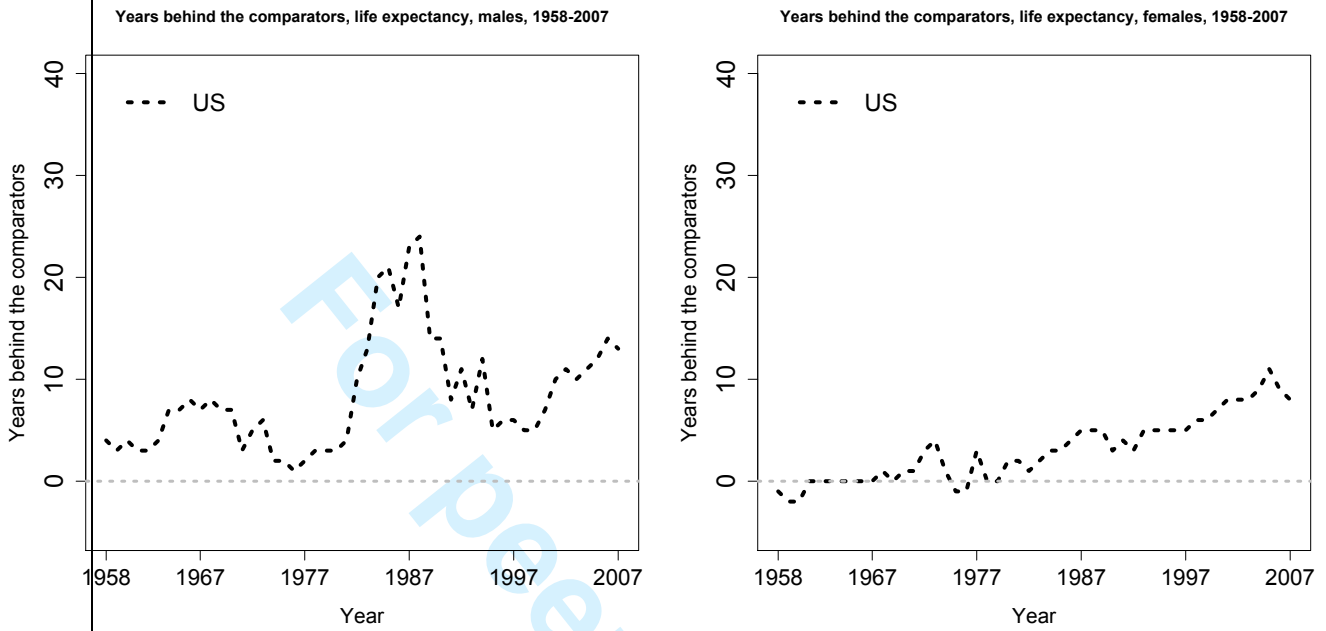

**Figure A.2.** Evolution of years behind the average of sixteen comparator high-income countries for US mortality rates across age groups, males and females, early 1960s and early 2000s

**(a) Males**

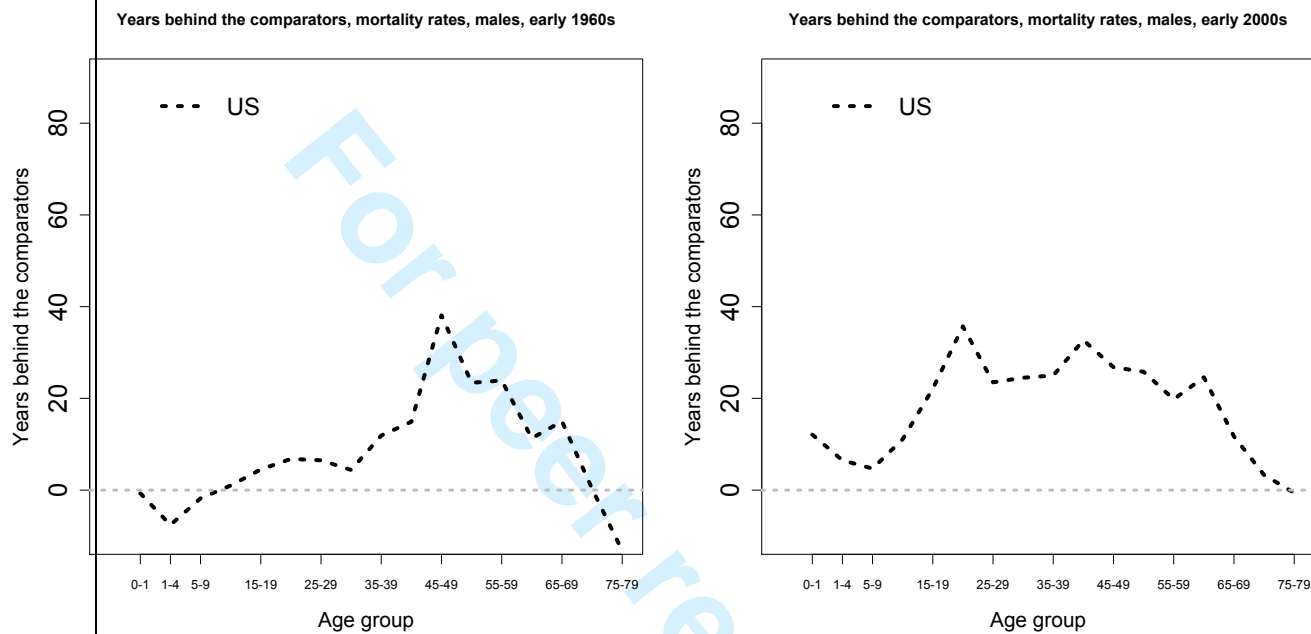

**(b) Females**

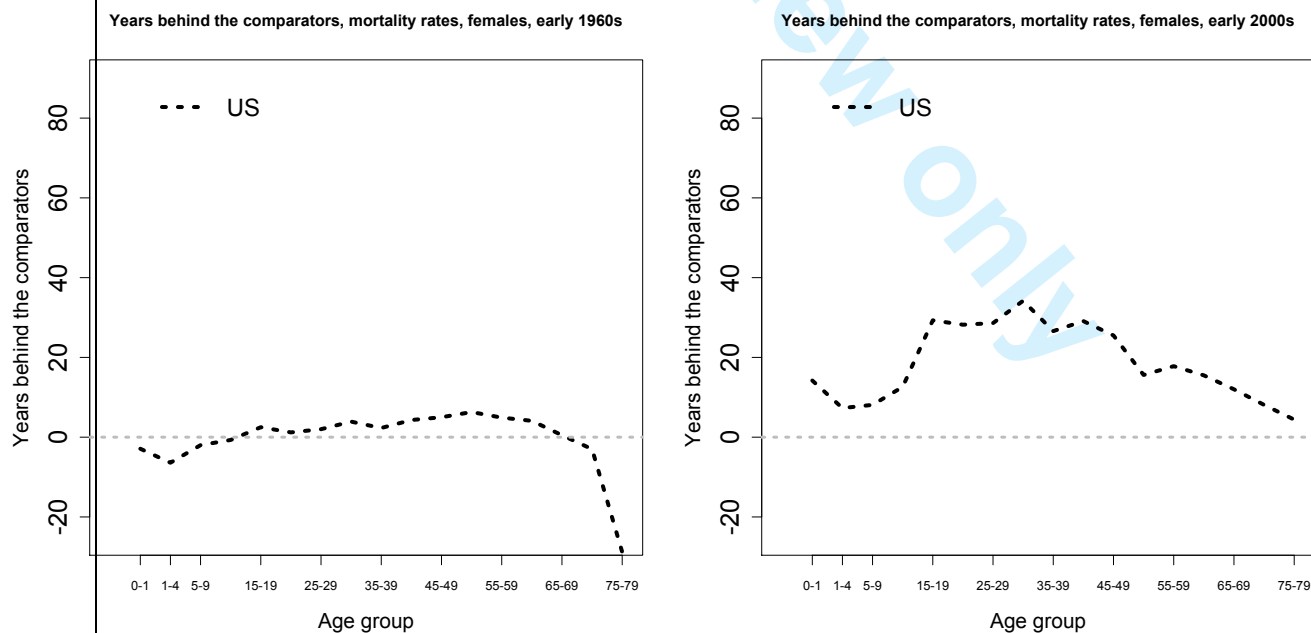

**Note:** Early 1960s refers to the period 1958-67 and early 2000s refers to 1998-2007.

**Figure A.3.** Evolution of years behind the average of sixteen comparator high-income countries for US mortality rates in the 0-14 age group, males and females, 1958-2007

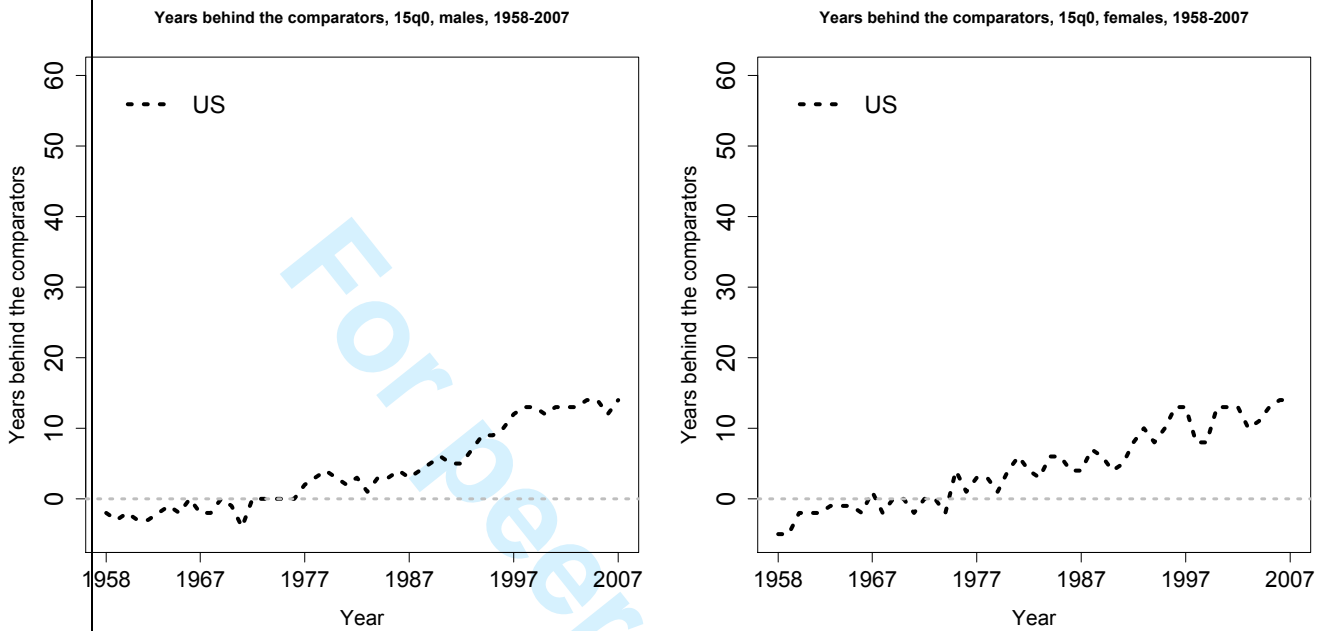

Note: 15q0 is defined as the probability of dying from birth through age 14 at then prevailing age-specific mortality rates.



**Figure A.4.** Evolution of years behind the average of sixteen comparator high-income countries for US mortality rates in the 15-49 age group, males and females, 1958-2007

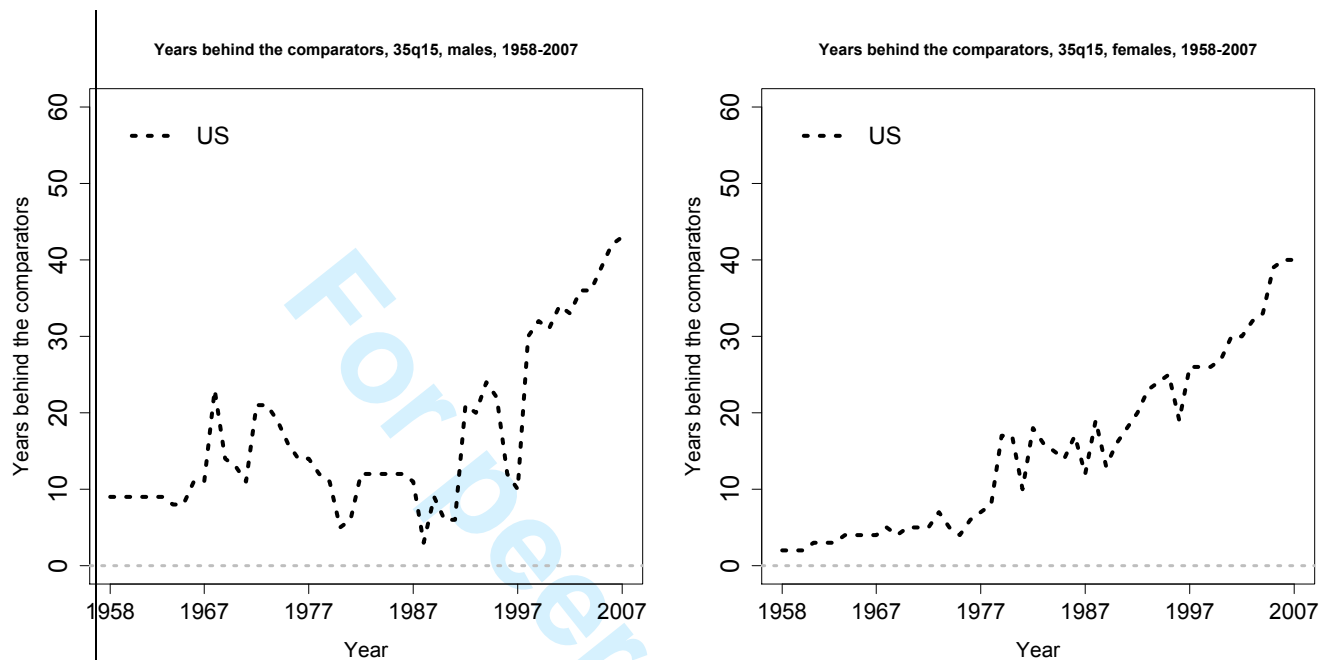

Note: 35q15 is defined as the probability of dying from age 15 through age 49 at then prevailing age-specific mortality rates.

**Figure A.5.** Gap in life expectancy between the US and the leader, and between the US and the average of sixteen comparator high-income countries, males and females, 1958-2007

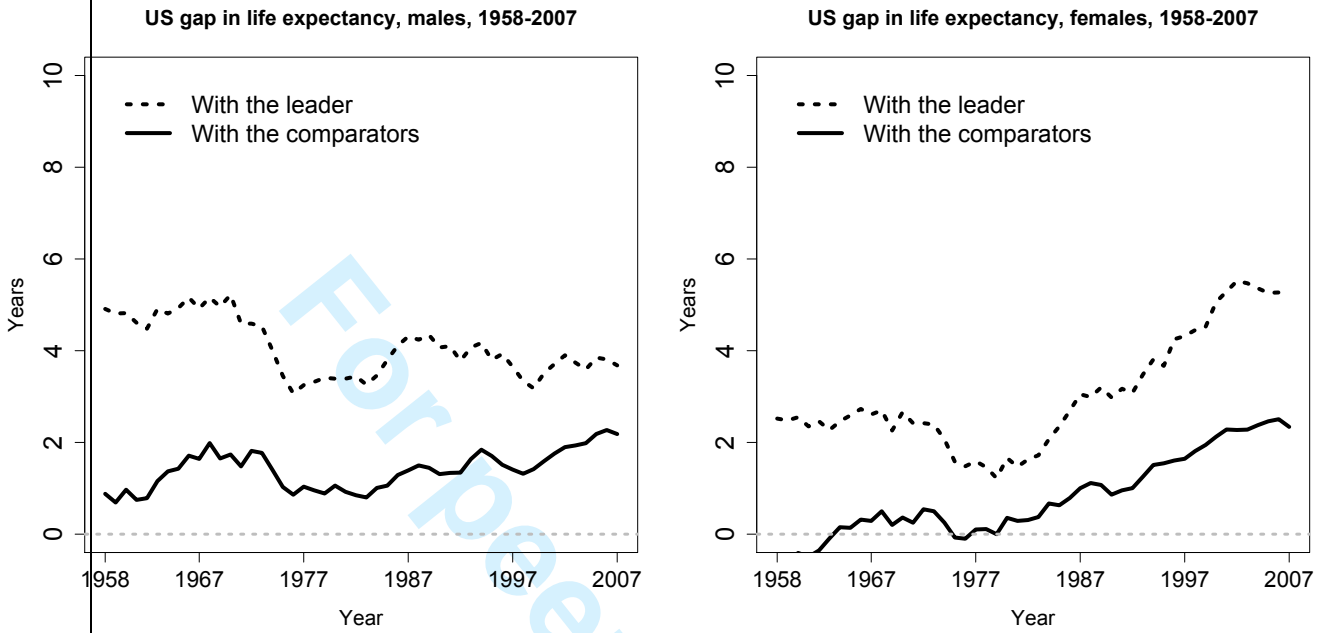

**Figure A.6.** Gap in mortality rates in the 0-14 age group between the US and the leader, and between the US and the average of sixteen comparator high-income countries, males and females, 1958-2007

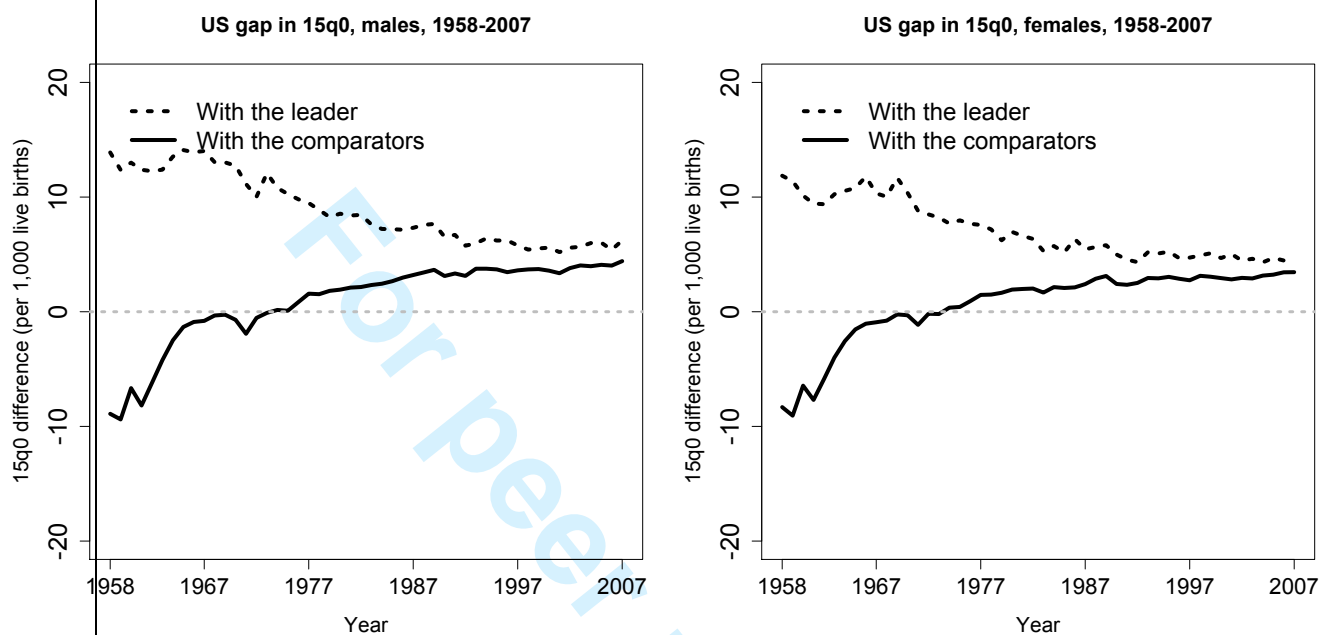

Note: 15q0 is defined as the probability of dying from birth through age 14 at then prevailing age-specific mortality rates.

**Figure A.7.** Gap in mortality rates in the 15-49 age group between the US and the leader, and between the US and the average of sixteen comparator high-income countries, males and females, 1958-2007

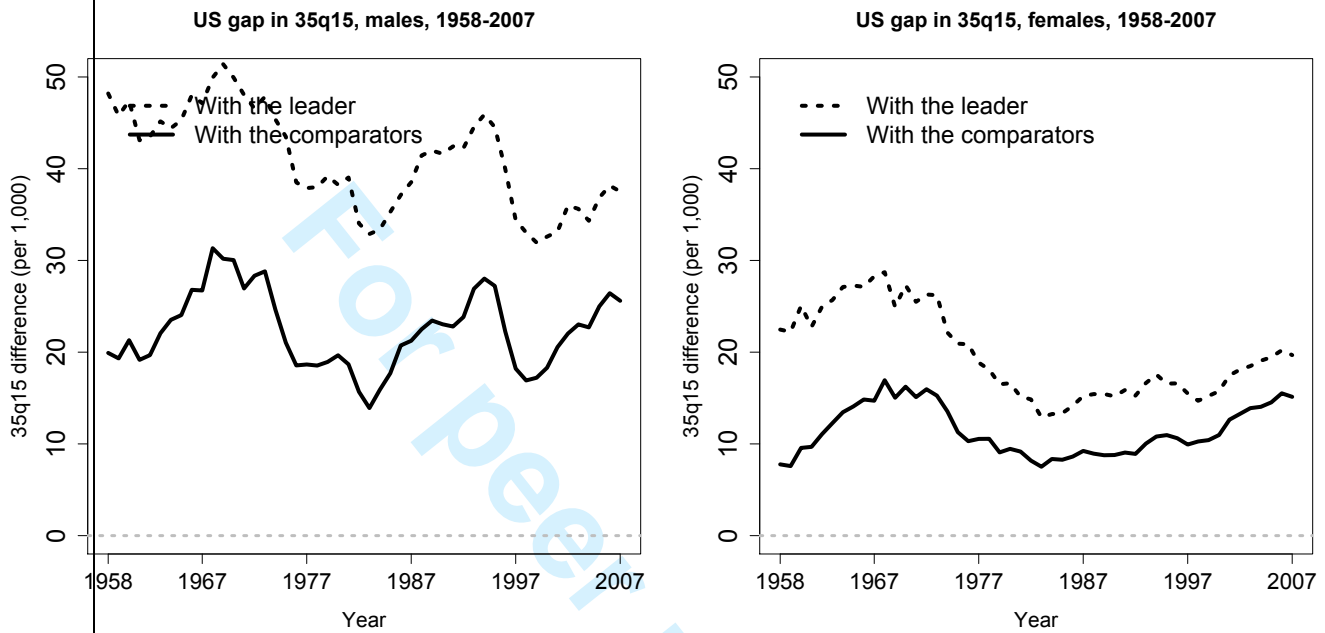

Note: 35q15 is defined as the probability of dying from age 15 through age 49 at then prevailing age-specific mortality rates.

**Figure A.8.** Evolution of life expectancy for the leader, the US, and the average of sixteen comparator high-income countries, males and females, 1958-2007

**Life expectancy, males, 1958-2007**

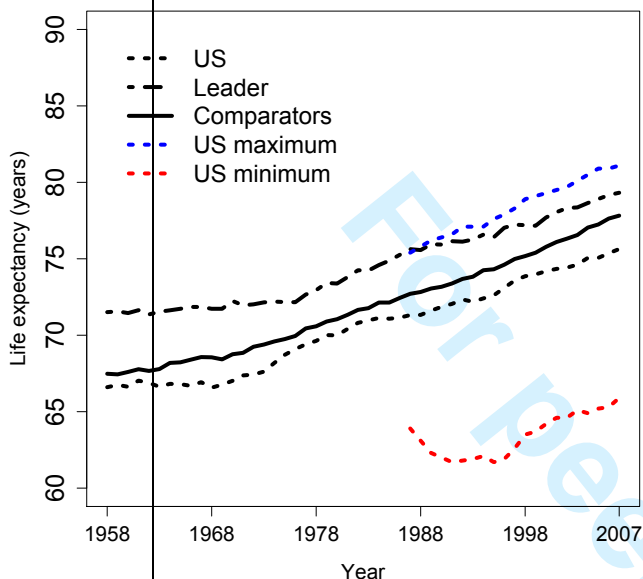

**Life expectancy, males, 1958-2007**

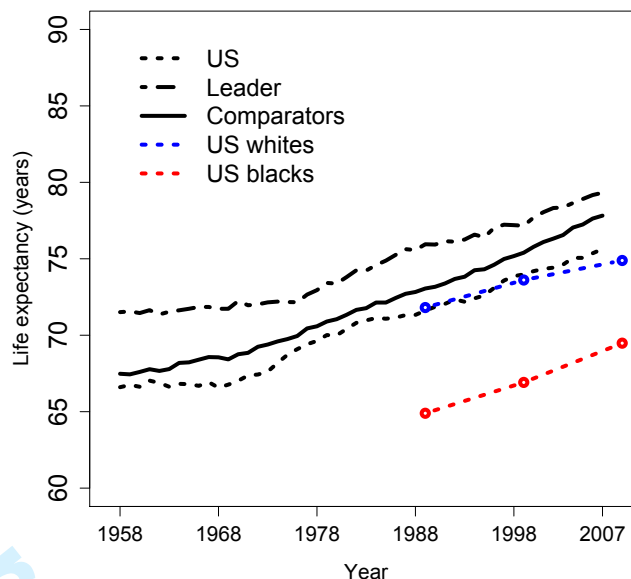

**Life expectancy, females, 1958-2007**

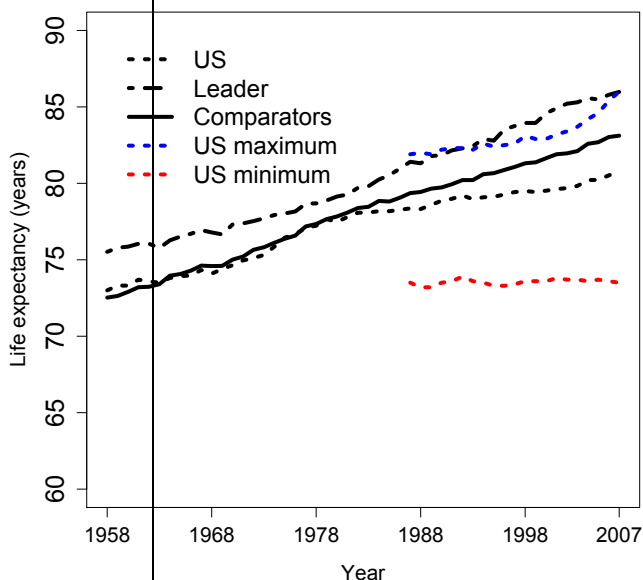

**Life expectancy, females, 1958-2007**

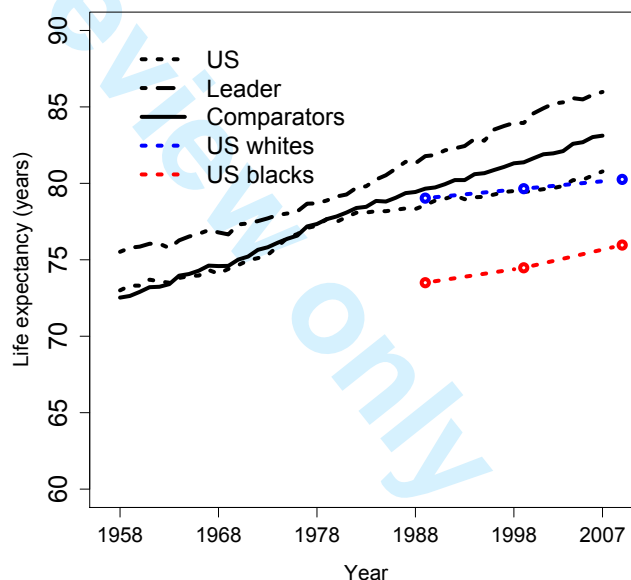

US maximum = maximum life expectancy (by county); US minimum = minimum life expectancy (by county); US whites = average life expectancy for white individuals (by county); US blacks = average life expectancy for black individuals (by county).

Source: Institute for Health Metrics and Evaluation, University of Washington.

**Figure A.9.** Evolution of mortality rates (per 100,000) for diseases of the circulatory system and ischemic heart disease for the US and the average of sixteen comparator high-income countries, males and females, 1960-2010

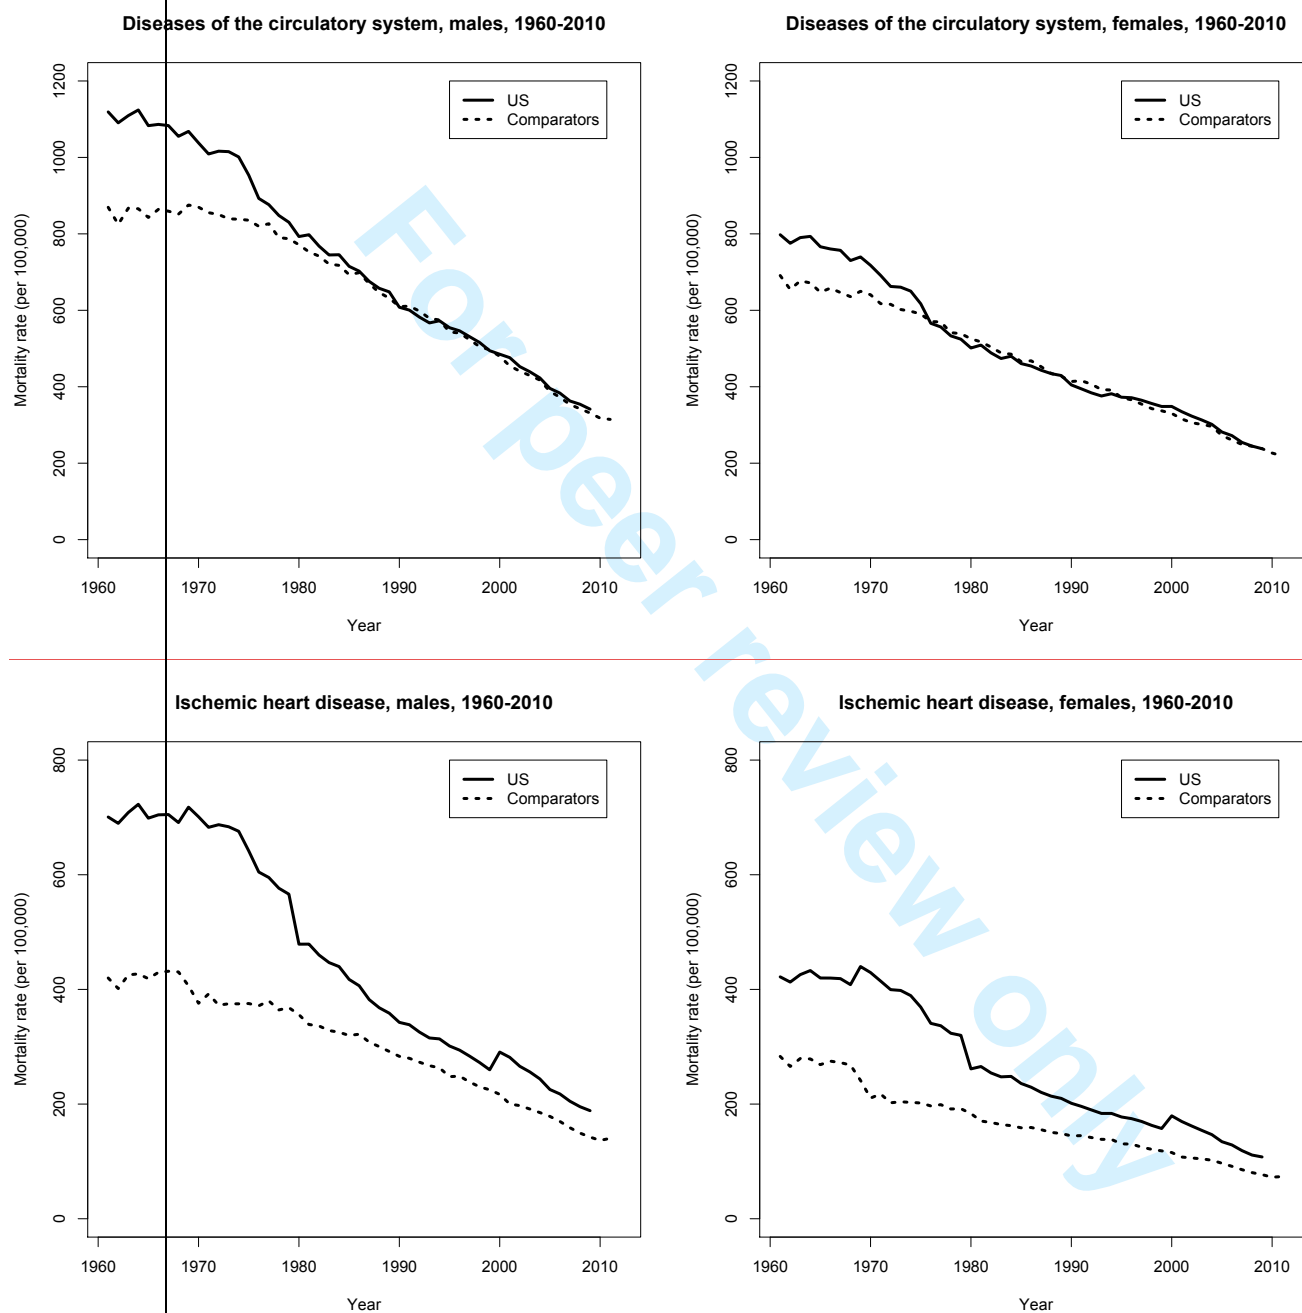

Source: Organisation for Economic Co-operation and Development.

Note: Diseases of the circulatory system include: acute rheumatic fever; chronic rheumatic heart diseases; hypertensive diseases; ischemic heart diseases; pulmonary heart disease and diseases of pulmonary circulation; other forms of heart disease; cerebrovascular diseases; diseases of arteries, arterioles, and capillaries; diseases of veins, lymphatic vessels and lymph nodes, not elsewhere classified; other unspecified diseases of the circulatory system.
